# Supplementary material for: Trends in gender and socioeconomic inequalities in mental health following the Great Recession and subsequent austerity policies: a repeat cross-sectional analysis of the Health Surveys for England
Source: PubMed Central journal article supplement (PMC6119415; doi:10.1136/bmjopen-2018-022924), 2018-08-30
Supplement: bmjopen-2018-022924.draft_revisions.pdf [file bmjopen-2018-022924.draft_revisions.pdf]

# BMJ Open

BMJ Open is committed to open peer review. As part of this commitment we make the peer review history of every article we publish publicly available.

When an article is published we post the peer reviewers' comments and the authors' responses online. We also post the versions of the paper that were used during peer review. These are the versions that the peer review comments apply to.

The versions of the paper that follow are the versions that were submitted during the peer review process. They are not the versions of record or the final published versions. They should not be cited or distributed as the published version of this manuscript.

BMJ Open is an open access journal and the full, final, typeset and author-corrected version of record of the manuscript is available on our site with no access controls, subscription charges or pay-per-view fees (<http://bmjopen.bmj.com>).

If you have any questions on BMJ Open's open peer review process please email [info.bmjopen@bmj.com](mailto:info.bmjopen@bmj.com)

# BMJ Open

## Trends in gender and socioeconomic inequalities in mental health in England following the Great Recession and subsequent austerity policies

|                               |                                                                                                                                                                                                                                                                                                                       |
|-------------------------------|-----------------------------------------------------------------------------------------------------------------------------------------------------------------------------------------------------------------------------------------------------------------------------------------------------------------------|
| Journal:                      | <i>BMJ Open</i>                                                                                                                                                                                                                                                                                                       |
| Manuscript ID                 | bmjopen-2018-022924                                                                                                                                                                                                                                                                                                   |
| Article Type:                 | Research                                                                                                                                                                                                                                                                                                              |
| Date Submitted by the Author: | 16-Mar-2018                                                                                                                                                                                                                                                                                                           |
| Complete List of Authors:     | Thomson, Rachel; MRC/CSO Social & Public Health Sciences Unit, University of Glasgow; NHS Ayrshire and Arran, Public Health<br>Niedzwiedz, Claire; MRC/CSO Social & Public Health Sciences Unit, University of Glasgow<br>Katikireddi, Srinivasa; MRC/CSO Social & Public Health Sciences Unit, University of Glasgow |
| Keywords:                     | MENTAL HEALTH, PUBLIC HEALTH, SOCIAL MEDICINE, EPIDEMIOLOGY                                                                                                                                                                                                                                                           |
|                               |                                                                                                                                                                                                                                                                                                                       |

SCHOLARONE™  
Manuscripts

View Only

1  
2  
3 **Trends in gender and socioeconomic inequalities in mental health in England**  
4  
5 **following the Great Recession and subsequent austerity policies**  
6

7 Rachel M Thomson\*<sup>[1, 2]</sup>, Claire L Niedzwiedz<sup>[1]</sup>, Srinivasa Vittal Katikireddi<sup>[1]</sup>  
8

9  
10 [1] MRC/CSO Social & Public Health Sciences Unit, University of Glasgow, UK

11 [2] Public Health Department, NHS Ayrshire & Arran, UK  
12

13 \*Corresponding author  
14

15 Postal address:

16  
17 Dr Rachel Thomson  
18 Public Health Dept, Afton House  
19 Ailsa Hospital Campus  
20 Dalmellington Road  
21 Ayr KA6 6AB  
22

23 Email [rachel.thomson8@nhs.net](mailto:rachel.thomson8@nhs.net)

24 Phone: 01292 885 858  
25  
26  
27  
28

29 **Word count** (excl. title page, abstract, references, figures and tables, declarations): 3015 words  
30  
31  
32  
33  
34  
35  
36  
37  
38  
39  
40  
41  
42  
43  
44  
45  
46  
47  
48  
49  
50  
51  
52  
53  
54  
55  
56  
57  
58  
59  
60

**ABSTRACT**

**Objective:** It is known that mental health deteriorated following the 2008 global financial crisis, and that subsequent UK austerity policies post-2010 disproportionately impacted women and those in deprived areas. We aimed to assess whether gender and socioeconomic inequalities in poor mental health have changed since the onset of austerity policies.

**Design:** Repeat cross-sectional analysis of survey data.

**Setting:** England.

**Participants:** Nationally and regionally representative samples of the working age population (25-64 years) from the Health Survey for England (1991-2014).

**Outcome Measures:** Population-level poor mental health was measured by General Health Questionnaire-12 (GHQ) caseness, stratified by gender and socioeconomic position (area-level deprivation and highest educational attainment).

**Results:** The prevalence of age-adjusted male GHQ caseness increased by 5.9% (percentage points; 95% CI 3.2%-8.5%,  $P<0.001$ ) from 2008 to 2009 in the immediate post-recession period, but recovered to pre-recession levels after 2010. In women, there was little change in 2009 or 2010, but an increase of 3.0% (95% CI 1.0%-5.1%,  $p=0.004$ ) in 2012 compared to 2008 following the onset of austerity. Estimates were largely unchanged after further adjustment for socioeconomic position, employment status, and household income as potential mediators. Relative socioeconomic inequalities in GHQ caseness narrowed from 2008 to 2010 immediately following the recession, with relative index of inequality (RII) falling from 2.28 (95% CI 1.89-2.76,  $p<0.001$ ) to 1.85 (95% CI 1.43-2.38,  $p<0.001$ ), but returned to pre-recession levels during austerity.

**Conclusions:** Gender inequalities in poor mental health narrowed following the Great Recession but widened during austerity, creating the widest gender gap since 1994. Socioeconomic inequalities in poor mental health narrowed immediately post-recession, but this trend may be now reversing. Austerity policies may contribute to widening mental health inequalities.

**Keywords:** mental health; public health; social medicine; epidemiology

**ARTICLE SUMMARY***What is already known on this subject?*

- The 2008 recession was associated with worsening population mental health, with an increase in the prevalence of poor mental health in men but not women in the UK.
- In the UK (and many other countries), austerity policies which include substantial welfare and public sector reforms have been implemented since 2010.

*What this study adds?*

- Since the onset of austerity policies, there has been a widening of gender inequalities in poor mental health due to worsening mental health among women in 2012, while men's mental health has recovered following the Great Recession.
- Socioeconomic inequalities in poor mental health narrowed immediately following the recession but returned to pre-recession highs by 2014, with those without formal qualifications emerging as a high risk group.
- The potential for adverse mental health consequences of austerity policies should be considered by government policymakers.

*Strengths and limitations of this study*

- Data are from a large nationally and regionally representative survey, and our study considered trends over a long period of time using a validated measure of poor mental health.
- Inequalities in poor mental health were explored by both socioeconomic status (using two measures to demonstrate consistency of trends) and gender, rarely explicitly done in current literature.
- Lack of available data meant it was not possible to categorise individuals according to whether they were subject to specific austerity measures; further research with such data and a clear control group would strengthen arguments for causality.
- The use of cross-sectional rather than longitudinal data mean the ability to derive causal inferences is limited and further longitudinal work may be required.

## INTRODUCTION

The health and social repercussions of the 2008 Great Recession are still being felt today.[1, 2] Much existing research has focused on the relationship between the economic downturn, rises in unemployment, and worsening mental health outcomes.[3, 4] Mirroring historical trends, in the aftermath of the recession there was an improvement in all-cause mortality across Europe,[5] paradoxically accompanied by a sharp rise in suicide rates which disproportionately impacted men.[6]

There has been a growing call to interpret trends in mental health outcomes in the context of the political decisions that followed,[7, 8] particularly given that there was marked cross-national variation in these outcomes.[9] It has been argued that the pursuit of austerity policies in response to the recession, usually involving large-scale public sector reforms, may actually have worsened health outcomes and delayed economic recovery.[10-12] It has also been postulated that austerity policies may worsen inequalities in health outcomes, as they frequently result in cutbacks to programs aiming to address inequitable distribution of the social determinants of health such as housing and education.[13]

The package of austerity measures implemented by the UK Government in 2010 was the third largest in Europe, with substantial cuts especially to welfare, health and social care.[14] Between 2010 and 2015, £26 billion worth of cuts were made to benefits, tax credits, pay and pensions in the UK,[15] with local authorities serving more deprived communities seeing greater financial losses.[16] 85% of financial savings from welfare reforms have been taken from the incomes of women, largely due to the fact that they make up the majority of lone parents and unpaid carers.[17] Women also form a large proportion of the public sector workforce, two-thirds in 2012-13,[18] so are more likely to have been impacted by the two year public sector pay freeze in 2010 and subsequent 1% pay cap that has led to a pay cut in real terms.[14]

Our previous research demonstrated an increase in poor mental health in men but not women following the Great Recession, with no clear evidence for an increase in socioeconomic inequalities.[19]

We aimed for the first time to investigate trends in both gender inequalities and socioeconomic inequalities in poor mental health in the UK following the onset of austerity, and compare these to the immediate aftermath of the 2008 recession.

## METHODS

### Dataset

Following our previous approach, we used the Health Survey for England (HSE; 1991-2014), a multi-stage stratified random sample designed to be nationally and regionally representative, to construct a repeat cross-sectional dataset. Details of the HSE have been published elsewhere.[20] Response levels have fallen over time but plateaued recently, remaining reasonably high at 62% in 2014 compared with 64% in 2007.[21] Weights for non-response were available from 2003. The rationale for choosing this dataset was the lengthy time period over which it has run using standardised methods, allowing consideration of very long-term trends.

### Population

The HSE general population samples were used for all analyses, restricted to those between 25 and 64 years of age to minimise misclassification of employment status among students. Those missing data on age, gender, measure of socioeconomic position (SEP), employment status or outcome were excluded. Sensitivity analysis was performed using the population aged 25-59 years to ensure inclusion of early retirees was not impacting results.

From 1991-2014 there were 128,003 potential participants. 7,774 participants (6.1%) missing outcome data, 109 (0.1%) missing educational attainment, 2964 (2.3%) with foreign or other qualifications which could not be categorised, and 37 (0.03%) missing employment status were excluded, leaving 117,119 participants (91.5%) for inclusion. For analysis using area-level deprivation from 2001 onwards where there were 73,682 potential participants, 5,317 participants (7.2%) missing outcome data, 562 participants (0.7%) missing deprivation score, and 25 (0.03%) missing employment status were excluded, leaving 67,778 participants for inclusion (92.0%).

### Exposure Measurement and Covariates

The SEP exposure measures considered were educational attainment and area-level deprivation. Highest educational attainment was available for all years except 1995 and 1996, coded into four categories: degree-level or equivalent, A-level or equivalent, GCSE or equivalent, and no formal qualifications. A marker of small area-level deprivation based on postcode (Index of Multiple Deprivation [IMD] scored in quintiles) was available from 2001.

Covariates considered were employment status and total household income. Employment status was recorded as self-reported activity within the preceding week, coded in six categories: in

1  
2  
3 employment, unemployed, retired through ill health, retired, looking after home, or in education.  
4 Total household income was available from 1997, coded into quintiles.  
5

6  
7 The UK economy did not enter recession until the last quarter of 2008 (defined by two successive  
8 quarters of negative growth in GDP),[22, 23] and while austerity policies were announced in mid-  
9 2010[14] it is unlikely that health consequences would have manifested within this year. We  
10 therefore defined in advance all years up to and including 2008 'pre-recession', the years 2009 and  
11 2010 the 'recession period' and from 2012 onwards the 'austerity period' (outcome data were  
12 unavailable for 2011).  
13  
14  
15

### 16 **Outcome Measurement**

17  
18 Poor mental health was assessed using the General Health Questionnaire-12 (GHQ-12), a validated  
19 screening tool for common mental health problems used widely in epidemiological research, which  
20 scores self-reported symptoms of anxiety and depression.[24] The GHQ-12 formed part of the core  
21 questions in each sweep of the HSE except 1996 and 2007, though from 2010 has only been included  
22 every second year. A GHQ-12 score of four or greater indicates a strong likelihood of a common  
23 mental disorder,[25] and therefore defined a 'case'.  
24  
25  
26  
27  
28

### 29 **Statistical Analysis**

30  
31 Directly age-standardised prevalence estimates of GHQ caseness were calculated for each year,  
32 stratified by gender and both measures of SEP. The 2013 WHO European Standard Population was  
33 used for all direct standardisations, and estimates were displayed graphically.  
34  
35

36  
37 To quantify any potential impact of the recession and austerity on mental health by gender,  
38 multivariable logistic regression modelling was performed. First, data from each year were regressed  
39 separately to determine long-term trends in the difference between male and female caseness,  
40 adjusting for age, education, and employment status. In a combined dataset of all years, models for  
41 men and women separately were then created using 2008 as the baseline/pre-recession year, and  
42 adjusted for age, SEP, employment status, and total household income. As the main time period of  
43 interest was following the point at which IMD was recorded routinely, we focused on this as the  
44 primary measure of SEP, given marked changes in the distribution of educational attainment over  
45 the study period. In addition to odds ratios, adjusted prevalence differences were derived from the  
46 logistic regression models to give a measure of change on the absolute scale.  
47  
48  
49  
50  
51

52  
53 Long-term trends in socioeconomic inequalities in mental health over time were analysed using the  
54 relative index of inequality (RII), a regression-based index comparing the prevalence of the outcome  
55 of the theoretically lowest and highest SEP. Analysis was performed using both SEP measures.  
56  
57  
58  
59  
60



1  
2  
3  
4  
5  
6  
7  
8  
9  
10  
11  
12  
13  
14  
15  
16  
17  
18  
19  
20  
21  
22  
23  
24  
25  
26  
27  
28  
29  
30  
31  
32  
33  
34  
35  
36  
37  
38  
39  
40  
41  
42  
43  
44  
45  
46  
47  
48  
49  
50  
51  
52  
53  
54  
55  
56  
57  
58  
59  
60

Poisson regression was used to generate prevalence risk ratios with 95% confidence intervals,[26] which were then plotted to view trends. All models were adjusted for age and sex.

**Patient and Public Involvement**

There was no patient or public involvement in the design of this study.

For peer review only

## RESULTS

Characteristics of included individuals are displayed in supplementary appendix 1. Over the study period there was a marked increase in women reporting degree-level education, and for both genders the number reporting no formal qualifications fell. During the main time period of interest (2005 onwards) there was little change in gender distribution.

### Mental Health Trends by Gender

The prevalence of GHQ caseness was consistently higher in women than men over the study period (Figure 1). There were three clear points of deviation from secular trends for both genders which may be explained by periods of macroeconomic disruption: the late 1990s, early 2000s, and the period following the 2008 recession. The former two may represent the impact of smaller economic downturns during which the UK economy declined but avoided entering recession,[22, 23] and corresponding increases in prevalence were patterned similarly between genders. Conversely, in 2009 there was a marked increase in age-standardised GHQ caseness in men and a more modest increase in women, with only a slight improvement for men in 2010. During the austerity period this patterning altered. While in 2012 male GHQ caseness continued to decrease, female GHQ caseness increased to 18.7% (95% CI 17.2-20.2), its highest observed value since 2002.

[INSERT FIGURE 1]

Between 1991 and 2004 the difference between male and female prevalence, adjusted for age, education and employment status, narrowed from 7.9% (95% CI 4.3-11.4) to 3.3% (95% CI 1.1-5.6). Despite a marked further narrowing of this gender gap in the recession period with a fall to 1.1% (95% CI -1.8-4.0) in 2009, by 2012 it had sharply widened again to 6.8% (95% CI 4.6-8.9), the largest adjusted difference between male and female prevalence since 1994. Values for all years are provided in supplementary appendices 2 and 3.

Table 1 presents logistic regression models from the period of interest for each gender, with tables for the whole time period 2001-2014 available in supplementary appendix 4.

Table 1: Multiple logistic regression models (with odds ratios and % point difference) for participants of each gender, 2005-2014 (2008 as pre-recession reference year)

| Regression models for men (n=24,930)   |                                |         |              |              |                                            |         |              |              |                                                    |         |              |              |
|----------------------------------------|--------------------------------|---------|--------------|--------------|--------------------------------------------|---------|--------------|--------------|----------------------------------------------------|---------|--------------|--------------|
|                                        | Model 1: Adjusted for age, IMD |         |              |              | Model 2: Adjusted for age, IMD, employment |         |              |              | Model 3: Adjusted for age, IMD, employment, income |         |              |              |
| Year                                   | Odds Ratio                     | p-value | Lower 95% CI | Upper 95% CI | Odds Ratio                                 | p-value | Lower 95% CI | Upper 95% CI | Odds Ratio                                         | p-value | Lower 95% CI | Upper 95% CI |
| 2005                                   | 1.03                           | 0.722   | 0.86         | 1.24         | 0.92                                       | 0.400   | 0.76         | 1.12         | 0.90                                               | 0.303   | 0.74         | 1.10         |
| 2006                                   | 1.06                           | 0.476   | 0.91         | 1.24         | 1.04                                       | 0.676   | 0.88         | 1.22         | 1.03                                               | 0.765   | 0.87         | 1.21         |
| 2008                                   | 1.00                           | -       | -            | -            | 1.00                                       | -       | -            | -            | 1.00                                               | -       | -            | -            |
| 2009                                   | 1.64                           | <0.001  | 1.34         | 2.00         | 1.55                                       | <0.001  | 1.25         | 1.93         | 1.53                                               | <0.001  | 1.24         | 1.91         |
| 2010                                   | 1.28                           | 0.009   | 1.06         | 1.53         | 1.26                                       | 0.021   | 1.04         | 1.52         | 1.26                                               | 0.018   | 1.04         | 1.53         |
| 2012                                   | 1.15                           | 0.147   | 0.95         | 1.38         | 1.10                                       | 0.340   | 0.91         | 1.33         | 1.10                                               | 0.342   | 0.91         | 1.33         |
| 2014                                   | 1.13                           | 0.215   | 0.93         | 1.37         | 1.17                                       | 0.126   | 0.96         | 1.43         | 1.18                                               | 0.108   | 0.96         | 1.44         |
| Year                                   | % Diff.                        | p-value | Lower 95% CI | Upper 95% CI | % Diff.                                    | p-value | Lower 95% CI | Upper 95% CI | % Diff.                                            | p-value | Lower 95% CI | Upper 95% CI |
| 2005                                   | 0.34                           | 0.723   | -1.53        | 2.20         | -0.75                                      | 0.396   | -2.50        | 0.99         | -0.93                                              | 0.298   | -2.67        | 0.82         |
| 2006                                   | 0.58                           | 0.477   | -1.01        | 2.17         | 0.33                                       | 0.676   | -1.21        | 1.86         | 0.23                                               | 0.765   | -1.30        | 1.77         |
| 2008                                   | 0.00                           | -       | -            | -            | 0.00                                       | -       | -            | -            | 0.00                                               | -       | -            | -            |
| 2009                                   | 5.88                           | <0.001  | 3.24         | 8.52         | 4.72                                       | <0.001  | 2.20         | 7.23         | 4.62                                               | <0.001  | 2.11         | 7.12         |
| 2010                                   | 2.67                           | 0.012   | 0.60         | 4.73         | 2.29                                       | 0.024   | 0.30         | 4.28         | 2.37                                               | 0.021   | 0.36         | 4.38         |
| 2012                                   | 1.44                           | 0.154   | -0.54        | 3.42         | 0.89                                       | 0.344   | -0.95        | 2.73         | 0.89                                               | 0.346   | -0.96        | 2.74         |
| 2014                                   | 1.26                           | 0.223   | -0.77        | 3.30         | 1.53                                       | 0.134   | -0.47        | 3.52         | 1.63                                               | 0.115   | -0.40        | 3.65         |
| Regression models for women (n=31,413) |                                |         |              |              |                                            |         |              |              |                                                    |         |              |              |
|                                        | Model 1: Adjusted for age, IMD |         |              |              | Model 2: Adjusted for age, IMD, employment |         |              |              | Model 3: Adjusted for age, IMD, employment, income |         |              |              |
| Year                                   | Odds Ratio                     | p-value | Lower 95% CI | Upper 95% CI | Odds Ratio                                 | p-value | Lower 95% CI | Upper 95% CI | Odds Ratio                                         | p-value | Lower 95% CI | Upper 95% CI |
| 2005                                   | 1.06                           | 0.426   | 0.92         | 1.22         | 1.05                                       | 0.531   | 0.91         | 1.21         | 1.02                                               | 0.762   | 0.88         | 1.18         |
| 2006                                   | 0.91                           | 0.153   | 0.81         | 1.03         | 0.90                                       | 0.102   | 0.80         | 1.02         | 0.89                                               | 0.077   | 0.79         | 1.01         |
| 2008                                   | 1.00                           | -       | -            | -            | 1.00                                       | -       | -            | -            | 1.00                                               | -       | -            | -            |
| 2009                                   | 1.06                           | 0.537   | 0.89         | 1.25         | 1.07                                       | 0.429   | 0.90         | 1.28         | 1.07                                               | 0.431   | 0.90         | 1.28         |
| 2010                                   | 1.00                           | 0.980   | 0.86         | 1.15         | 0.99                                       | 0.849   | 0.85         | 1.14         | 0.99                                               | 0.922   | 0.86         | 1.15         |
| 2012                                   | 1.24                           | 0.003   | 1.08         | 1.42         | 1.24                                       | 0.003   | 1.07         | 1.43         | 1.25                                               | 0.002   | 1.09         | 1.45         |
| 2014                                   | 1.10                           | 0.208   | 0.95         | 1.27         | 1.11                                       | 0.171   | 0.96         | 1.28         | 1.12                                               | 0.138   | 0.97         | 1.29         |
| Year                                   | % Diff.                        | p-value | Lower 95% CI | Upper 95% CI | % Diff.                                    | p-value | Lower 95% CI | Upper 95% CI | % Diff.                                            | p-value | Lower 95% CI | Upper 95% CI |
| 2005                                   | 0.79                           | 0.429   | -1.16        | 2.74         | 0.60                                       | 0.533   | -1.29        | 2.50         | 0.29                                               | 0.762   | -1.60        | 2.18         |
| 2006                                   | -1.16                          | 0.153   | -2.74        | 0.43         | -1.28                                      | 0.102   | -2.82        | 0.25         | -1.39                                              | 0.077   | -2.94        | 0.15         |
| 2008                                   | 0.00                           | -       | -            | -            | 0.00                                       | -       | -            | -            | 0.00                                               | -       | -            | -            |
| 2009                                   | 0.73                           | 0.541   | -1.61        | 3.07         | 0.93                                       | 0.435   | -1.40        | 3.25         | 0.93                                               | 0.436   | -1.41        | 3.27         |
| 2010                                   | -0.02                          | 0.98    | -1.96        | 1.91         | -0.18                                      | 0.848   | -2.07        | 1.70         | -0.10                                              | 0.922   | -2.00        | 1.81         |

|      |      |       |       |      |      |       |       |      |      |       |       |      |
|------|------|-------|-------|------|------|-------|-------|------|------|-------|-------|------|
| 2012 | 3.04 | 0.004 | 0.99  | 5.08 | 2.90 | 0.004 | 0.93  | 4.88 | 3.11 | 0.002 | 1.11  | 5.11 |
| 2014 | 1.27 | 0.213 | -0.73 | 3.28 | 1.34 | 0.176 | -0.60 | 3.29 | 1.47 | 0.142 | -0.49 | 3.44 |

GHQ caseness in men was higher in both 2009 and 2010 after adjusting for age and IMD, with prevalence predicted to have increased in the population by 5.9% (95% CI 3.2-8.5,  $p<0.001$ ) percentage points from 2008 to 2009. This increase remained largely unchanged (4.6%, 95% CI 2.1-7.1,  $p<0.001$ ) after adjustment for the potential mediating effect of employment status and household income. For men, there was no evidence of significant worsening of population mental health in either 2012 or 2014 when compared with 2008 in any model.

For women, after adjusting for age and IMD there was no evidence of an increase in GHQ caseness during the recessionary period. However, in 2012 the predicted increase in the population compared with 2008 was 3.0% (95% CI 1.0-5.1,  $p=0.004$ ), and after further adjustment for employment status and household income this remained largely unchanged at 3.1% (95% CI 1.1-5.1,  $p=0.002$ ). There was a smaller adjusted increase in 2014 compared with 2008 of 1.5% (95% CI -0.5-3.4,  $p=0.142$ ).

#### **Mental Health Trends by Socioeconomic Position**

[INSERT FIGURE 2]

There was a clear socioeconomic gradient in GHQ caseness throughout the study period (Figure 2). The absolute difference between the most and least deprived quintiles was amongst the highest recorded during the austerity period (13.5% in 2012, 11.2% in 2014) compared with smaller differences during the recession period (9.2% in 2009, 8.6% in 2010). All values are provided in supplementary appendix 5.

[INSERT FIGURE 3]

Stratification by highest educational attainment produced similar trends during the recession and austerity periods (Figure 3), with the exception of those with no formal qualifications. This group experienced worsening of GHQ caseness throughout the study period, rising from 15.7% (95% CI 12.8-18.5) in 1991 to 23.7% (95% CI 20.0-27.4) by 2014 without seeing the recovery experienced by other groups during austerity. All values are provided in supplementary appendix 6. To explore the marked worsening for the least educated during austerity, further stratification by gender was performed for the period 2012-2014: the increase in this group was predominantly among men, with age-standardised prevalence rising from 16.0% (95% CI 11.5-20.5) in 2012 to 22.8% (95% CI 17.3-28.3) in 2014, while for women the increase was smaller from 22.7% (95% CI 17.9-27.5) in 2012 to 24.7% (95% CI 19.8-29.5) in 2014.

1  
2  
3 [INSERT FIGURE 4]

4 Relative socioeconomic inequalities in GHQ caseness have been consistently observed since 1999  
5 (Figure 4). Inequalities in GHQ caseness have increased from the late 1990s to the immediate pre-  
6 recession period, with inequalities generally larger by area-level deprivation. During the recession  
7 period there was a slight reduction in socioeconomic inequalities, with RII by education falling from  
8 1.8 (95% CI 1.5-2.2,  $p<0.001$ ) in 2008 to 1.6 (95% CI 1.2-2.1,  $p=0.001$ ) in 2010 and by IMD quintile  
9 from 2.3 (95% CI 1.9-2.8,  $p<0.001$ ) in 2008 to 1.9 (95% CI 1.4-2.4,  $p<0.001$ ) in 2010. However, these  
10 trends reversed during the austerity period, and by 2014 both RIIs had returned to pre-recession  
11 levels. All values are provided in supplementary appendix 7.

12  
13  
14  
15  
16  
17  
18 For all analyses, sensitivity analysis excluding those aged 60-64 years did not affect trends.  
19  
20  
21  
22  
23  
24  
25  
26  
27  
28  
29  
30  
31  
32  
33  
34  
35  
36  
37  
38  
39  
40  
41  
42  
43  
44  
45  
46  
47  
48  
49  
50  
51  
52  
53  
54  
55  
56  
57  
58  
59  
60

## DISCUSSION

In this large repeat cross-sectional study of a representative sample of the English population, we found mental health worsened for women following the onset of austerity policies, while men saw a recovery to pre-recession levels. As a result of the changes, gender inequalities in poor mental health widened during the austerity period, reversing the trend from 1991-2004 of gradual improvement. We also found that socioeconomic inequalities in poor mental health narrowed in the immediate years following the 2008 recession but widened during austerity.

There is conflicting evidence in existing literature around whether mental health inequalities by gender or socioeconomic position have widened in the UK since the recession. Our previous work suggested males saw the sharpest worsening of mental health, and found no evidence of widening socioeconomic inequalities when existing trends were taken into account.[19] However, this was prior to the onset of austerity. More recent evidence showed a more marked worsening of mental health for women in 2014 compared with 2007, but did not take into account intervening years.[27] A large study of pan-European data including the UK found no systematic influence of the recession on socioeconomic inequalities in depression up to 2014,[28] but did not differentiate between the immediate recessionary period and the period following any economic policy response. Work by Barr et al suggested that from 2009 to 2013 there may have been a widening of socioeconomic inequalities in mental health in the UK.[29] However, this used self-reported diagnoses and only two broad categories of socioeconomic group. Our study adds clarity to both areas.

There is no consensus around what factors are responsible for the gender gap in poor mental health. There is little evidence it results from purely genetic or biological differences, with sociocultural roles, adverse life events and learned psychological attributes thought more likely contributing factors.[30] Our findings of a reversal in trend direction echo those of others who have begun to raise concerns about the mental health of UK women in recent years, particularly young women.[27, 31] The timing of this reversal in relation to austerity reforms, and the differential gender patterning of austerity,[17] could indicate that the change for women may be secondary to the policy response rather than the economic crisis itself.

The finding of a reversal in trend towards widening socioeconomic inequalities following the onset of austerity adds to the evidence base arguing such measures may mediate the link between macroeconomic change and mental health.[2, 10] Ecological studies using pan-European data suggest the direct effect of unemployment on suicide rates was greater in countries with lower social spending,[32] and conversely, higher government spending on unemployment support may mitigate adverse impacts on self-rated health.[33] On a relative scale the widening of socioeconomic

1  
2  
3 inequalities post-austerity is small in the context of long-term trends, possibly explaining the current  
4 lack of consensus.[28, 29]  
5

6 The marked divergence for those with no formal qualifications by 2014 may support the hypothesis  
7 that those in low-skilled jobs (who are known to experience poorer health outcomes[34]) may be  
8 worst affected by reduced in-work financial support or worsening job conditions such as increased  
9 insecure work.[35] Their divergence may also be partly attributable to changes in demographics over  
10 the study period, with the group achieving no qualifications becoming smaller and more  
11 homogenous over time. Regardless, they are notable outliers in 2014, identifying this group as  
12 particularly high risk for poor mental health.  
13  
14  
15  
16  
17

### 18 **Strengths and Limitations**

19  
20 Our study has a number of important strengths. The HSE is a large, nationally and regionally  
21 representative survey which has used standard protocols over a long period of time. The GHQ-12 is a  
22 validated and commonly used measure, and outcome data were available for most years allowing  
23 detailed consideration of trends. The use and comparison of two measures of SEP is useful in  
24 demonstrating consistency of trends between SEP and poor mental health.  
25  
26  
27  
28

29 Our study also has some limitations which must be considered. The use of cross-sectional rather  
30 than individual longitudinal data mean the ability to derive causal inferences is limited; however, it  
31 does overcome attrition bias in cohort studies which can commonly lead to an underestimation of  
32 inequalities.[36] As data were not collected on whether individuals were subject to specific austerity  
33 measures, this could not be included as an explanatory variable. Household income was felt to be a  
34 reasonable proxy given that most reforms were associated with financial loss.[16] It is unfortunate  
35 that outcome data were not available from 2007, 2011, 2013 or 2015, as this would have  
36 strengthened the evidence for the assessment of trends.  
37  
38  
39  
40  
41

42 Further research using longitudinal data would add strength to any argument for causality, as would  
43 replication using alternative outcome measures, such as antidepressant prescriptions. Distinguishing  
44 between the impact of different components of austerity measures, e.g. public sector employment  
45 terms, welfare reforms, or access to community services, could add further nuance to our reporting  
46 of their potential combined impact. Furthermore, increasing devolution provides the opportunity to  
47 study differences in policy approaches within the UK.[37] Cross-national comparisons would also be  
48 useful in determining whether observed trends are replicated elsewhere, and whether impacts are  
49 dependent on levels of austerity, and natural experiment approaches could strengthen causal  
50 inference.[38] Finally, it is clearly important to see whether the observed trajectories in mental  
51  
52  
53  
54  
55  
56  
57  
58  
59  
60

1  
2  
3 health inequalities have continued following 2014, particularly given that more severe welfare  
4 reforms were initiated in 2015.[16]  
5

## 6 **Conclusions**

7  
8  
9 This study adds to what the European Psychiatric Association in 2016 described as an emerging  
10 'broad consensus about the deleterious consequences of economic crises on mental health'.[39] The  
11 gender gap in mental health, which had been improving prior to the recession, appears to be sharply  
12 widening again following the onset of austerity policies which have largely focused on women. Those  
13 in the most deprived groups have been shown to be at potentially heightened risk of poor mental  
14 health following the onset of austerity, with the least educated at highest risk.  
15  
16  
17

18  
19 These findings are alarming, particularly given that since the time period studied there have been  
20 further cuts to mental health provision which mean the issue may now be worse.[40] Labonté and  
21 Stuckler argue in strong terms that, based on current evidence of economic, health and social harms,  
22 austerity policies threaten to 'imperil the world's population' without radical reform.[2]  
23 Policymakers in the UK, and those considering embarking on or continuing austerity measures  
24 elsewhere in the world, should be aware that these may have adverse health impacts for their  
25 populations.  
26  
27  
28  
29  
30  
31  
32  
33  
34  
35  
36  
37  
38  
39  
40  
41  
42  
43  
44  
45  
46  
47  
48  
49  
50  
51  
52  
53  
54  
55  
56  
57  
58  
59  
60



## DECLARATIONS

### Acknowledgements

We would like to thank Frank Popham for providing feedback on drafts of the manuscript. We are extremely grateful to the individuals who took part in all cycles of the Health Survey for England, and all those involved in its administration over the years. We would like to acknowledge the assistance of the UK Data Archive for providing access to the data; the Information Centre for health and social care and Department of Health for sponsoring the Health Survey for England; and the Principal Investigators of the Health Survey for England, Natcen Social Research and the Department of Epidemiology and Public Health at the Royal Free and University College Medical School. The responsibility for the analysis presented here lies solely with the authors.

### Competing Interests

The authors declare no conflicts of interest.

### Funding

SVK is funded by a NRS Senior Clinical Fellowship (SCAF/15/02), the Medical Research Council (MC\_UU\_12017/13 & MC\_UU\_12017/15) and Scottish Government Chief Scientist Office (SPHSU13 & SPHSU15). CLN is funded by the Medical Research Council (MR/R024774/1).

### Contributors

RT serves as guarantor for this article. RT and SVK conceived the idea for the study, and RT performed the statistical analysis and wrote the first draft of the article. CN, FP and SVK assisted in research design, interpretation of findings and critical revision of the manuscript.

### Ethics Approval

Ethical approval was not required for this study as it used previously collected data. Ethical approval for each year of the survey was obtained by the Health Survey for England team.

### Data Sharing Statement

Supplementary files are provided.

## REFERENCES

1. Stuckler D, Basu S, Suhrcke M, et al. The public health effect of economic crises and alternative policy responses in Europe: an empirical analysis. *Lancet* 2009;374(9686):315-23. doi: 10.1016/S0140-6736(09)61124-7
2. Labonte R, Stuckler D. The rise of neoliberalism: how bad economics imperils health and what to do about it. *J Epidemiol Community Health* 2016;70(3):312-18. doi: 10.1136/jech-2015-206295
3. Frasquilho D, Matos MG, Salonna F, et al. Mental health outcomes in times of economic recession: a systematic literature review. *BMC Public Health* 2016;16:115. doi: 10.1186/s12889-016-2720-y [published Online First: 2016/02/06]
4. Katikireddi SV, Niedzwiedz CL, Popham F. Employment status and income as potential mediators of educational inequalities in population mental health. *Eur J Public Health* 2016;26(5):814-16. doi: 10.1093/eurpub/ckw126
5. Tapia Granados JA, Ionides EL. Population health and the economy: Mortality and the Great Recession in Europe. *Health Econ* 2017 doi: 10.1002/hec.3495 [published Online First: 2017/03/28]
6. Toffolutti V, Suhrcke M. Assessing the short term health impact of the Great Recession in the European Union: a cross-country panel analysis. *Prev Med* 2014;64:54-62. doi: 10.1016/j.ypmed.2014.03.028 [published Online First: 2014/04/11]
7. Karanikolos M, Heino P, McKee M, et al. Effects of the Global Financial Crisis on Health in High-Income Oecd Countries: A Narrative Review. *Int J Health Serv* 2016;46(2):208-40. doi: 10.1177/0020731416637160
8. Stuckler D, Basu S. *The Body Economic: Eight experiments in economic recovery, from Iceland to Greece*. London: Penguin 2013.
9. Reeves A, McKee M, Stuckler D. Economic suicides in the Great Recession in Europe and North America. *Br J Psychiatry* 2014;205(3):246-7. doi: 10.1192/bjp.bp.114.144766 [published Online First: 2014/06/14]
10. Karanikolos M, Mladovsky P, Cylus J, et al. Financial crisis, austerity, and health in Europe. *Lancet* 2013;381(9874):1323-31. doi: 10.1016/s0140-6736(13)60102-6 [published Online First: 2013/04/02]
11. De Vogli R. The financial crisis, health and health inequities in Europe: the need for regulations, redistribution and social protection. *Int J Equity Health* 2014;13:58. doi: 10.1186/s12939-014-0058-6 [published Online First: 2014/07/26]

- 1  
2  
3 12. Loopstra R, McKee M, Katikireddi SV, et al. Austerity and old-age mortality in England: a  
4 longitudinal cross-local area analysis, 2007-2013. *J R Soc Med* 2016;109(3):109-16. doi:  
5 10.1177/0141076816632215  
6  
7  
8 13. Ruckert A, Labonte R. The global financial crisis and health equity: early experiences from  
9 Canada. *Global Health* 2014;10:2. doi: 10.1186/1744-8603-10-2 [published Online First:  
10 2014/01/08]  
11  
12 14. Reeves A, Basu S, McKee M, et al. Austere or not? UK coalition government budgets and health  
13 inequalities. *J R Soc Med* 2013;106(11):432-6. doi: 10.1177/0141076813501101  
14  
15  
16 15. Engender, Scottish Refugee Council, Scottish Women's Aid, et al. A Widening Gap: Women and  
17 Welfare Reform. Scotland: Engender, 2015.  
18  
19  
20 16. Beatty C, Fothergill S. The uneven impact of welfare reform: The financial losses to places and  
21 people. Sheffield: Centre for Regional Economic and Social Research, Sheffield Hallam  
22 University, 2016.  
23  
24  
25 17. Ariss A, Firmin C, Meacher B, et al. Where's the Benefit? An Independent Inquiry into Women  
26 and Jobseeker's Allowance. In: Society TF, ed. London: The Fawcett Society, 2015.  
27  
28  
29 18. Cribb J, Disney R, Sibieta L. The public sector workforce: past, present and future. London, 2014.  
30  
31  
32 19. Katikireddi SV, Niedzwiedz CL, Popham F. Trends in population mental health before and after  
33 the 2008 recession: a repeat cross-sectional analysis of the 1991-2010 Health Surveys of  
34 England. *BMJ Open* 2012;2(5) doi: 10.1136/bmjopen-2012-001790  
35  
36  
37 20. Mindell J, Biddulph JP, Hirani V, et al. Cohort profile: the health survey for England. *Int J*  
38 *Epidemiol* 2012;41(6):1585-93. doi: 10.1093/ije/dyr199 [published Online First: 2012/01/19]  
39  
40  
41 21. NatCen Social Research, University College London, Department of Epidemiology and Public  
42 Health. Health Survey for England: UK Data Service, 1991-2014.  
43  
44  
45 22. Macrotrends LLC. FTSE 100 Index - 32 Year Historical Chart [Online]: Macrotrends LLC; [updated  
46 June 2017; cited 23rd June 2017]. Available from: <http://www.macrotrends.net/2598/ftse-100-index-historical-chart-data>.  
47  
48  
49 23. The Office for National Statistics. Times Series: Gross Domestic Product: Quarter on Quarter  
50 Growth: CVM SA%: ONS; [updated May 2017; cited 30th June 2017]. Available from:  
51 <https://www.ons.gov.uk/economy/grossdomesticproductgdp/timeseries/ihyq/pn2>.  
52  
53  
54 24. Goldberg DP, Gater R, Sartorius N, et al. The validity of two versions of the GHQ in the WHO  
55 study of mental illness in general health care. *Psychol Med* 1997;27(1):191-7. [published  
56 Online First: 1997/01/01]  
57  
58  
59

- 1  
2  
3  
4 25. Goldberg DP, Williams, P. A user's guide to the General Health Questionnaire. Windsor: NFER-  
5 Nelson 1988.  
6  
7  
8 26. Mood C. Logistic Regression: Why We Cannot Do What We Think We Can Do, and What We Can  
9 Do About It. *Eur Sociol Rev* 2010;26(1):67-82.  
10  
11 27. McManus S, Bebbington P, Jenkins R, et al. Mental health and wellbeing in England: Adult  
12 Psychiatric Morbidity Survey 2014. Leeds: NHS Digital 2016.  
13  
14  
15 28. Reibling N, Beckfield J, Huijts T, et al. Depressed during the depression: has the economic crisis  
16 affected mental health inequalities in Europe? Findings from the European Social Survey  
17 (2014) special module on the determinants of health. *Eur J Public Health*  
18 2017;27(suppl\_1):47-54. doi: 10.1093/eurpub/ckw225 [published Online First: 2017/03/30]  
19  
20  
21 29. Barr B, Kinderman P, Whitehead M. Trends in mental health inequalities in England during a  
22 period of recession, austerity and welfare reform 2004 to 2013. *Soc Sci Med* 2015;147:324-  
23 31. doi: 10.1016/j.socscimed.2015.11.009  
24  
25  
26 30. Piccinelli M, Wilkinson G. Gender differences in depression. Critical review. *Br J Psychiatry*  
27 2000;177:486-92. [published Online First: 2000/12/05]  
28  
29  
30 31. Lessof C, Ross A, Brind R, et al. Longitudinal Study of Young People in England cohort 2: health  
31 and wellbeing at wave 2; Research report UK: TNS BMRB, 2016.  
32  
33  
34 32. Baumbach A, Gulis G. Impact of financial crisis on selected health outcomes in Europe. *Eur J*  
35 *Public Health* 2014;24(3):399-403. doi: 10.1093/eurpub/cku042 [published Online First:  
36 2014/04/09]  
37  
38  
39 33. Toge AG. Health Effects of Unemployment in Europe During the Great Recession: The Impact of  
40 Unemployment Generosity. *Int J Health Serv* 2016;46(4):614-41. doi:  
41 10.1177/0020731416664688 [published Online First: 2016/08/27]  
42  
43  
44 34. Katikireddi SV, Leyland AH, McKee M, et al. Patterns of mortality by occupation in the UK, 1991-  
45 2011: a comparative analysis of linked census and mortality records. *Lancet Public Health*  
46 2017;2(11):e501-e12. doi: 10.1016/S2468-2667(17)30193-7  
47  
48  
49 35. Benach J, Vives A, Amable M, et al. Precarious employment: understanding an emerging social  
50 determinant of health. *Annu Rev Public Health* 2014;35:229-53. doi: 10.1146/annurev-  
51 publhealth-032013-182500  
52  
53  
54 36. Howe LD, Tilling K, Galobardes B, et al. Loss to follow-up in cohort studies: bias in estimates of  
55 socioeconomic inequalities. *Epidemiology* 2013;24(1):1-9. doi:  
56 10.1097/EDE.0b013e31827623b1 [published Online First: 2012/12/06]  
57  
58  
59

- 1  
2  
3  
4 37. Katikireddi SV, Smith KE, Stuckler D, et al. Devolution of power, revolution in public health? *J*  
5 *Public Health (Oxf)* 2017;39(2):241-47. doi: 10.1093/pubmed/fdw031  
6  
7  
8 38. Craig P, Katikireddi SV, Leyland A, et al. Natural Experiments: An Overview of Methods,  
9 Approaches, and Contributions to Public Health Intervention Research. *Annu Rev Public*  
10 *Health* 2017;38:39-56. doi: 10.1146/annurev-publhealth-031816-044327  
11  
12 39. Martin-Carrasco M, Evans-Lacko S, Dom G, et al. EPA guidance on mental health and economic  
13 crises in Europe. *Eur Arch Psychiatry Clin Neurosci* 2016;266(2):89-124. doi: 10.1007/s00406-  
14 016-0681-x [published Online First: 2016/02/15]  
15  
16  
17 40. British Medical Association. Mental health budgets cut [Online] [updated February 2017; cited  
18 October 2017]. Available from: [https://www.bma.org.uk/news/2017/february/mental-](https://www.bma.org.uk/news/2017/february/mental-health-budgets-cut)  
19 [health-budgets-cut](https://www.bma.org.uk/news/2017/february/mental-health-budgets-cut).  
20  
21  
22  
23  
24  
25  
26  
27  
28  
29  
30  
31  
32  
33  
34  
35  
36  
37  
38  
39  
40  
41  
42  
43  
44  
45  
46  
47  
48  
49  
50  
51  
52  
53  
54  
55  
56  
57  
58  
59  
60

**Figure 1: Age-standardised GHQ caseness in men and women aged 25-64 years, 1991-2014**

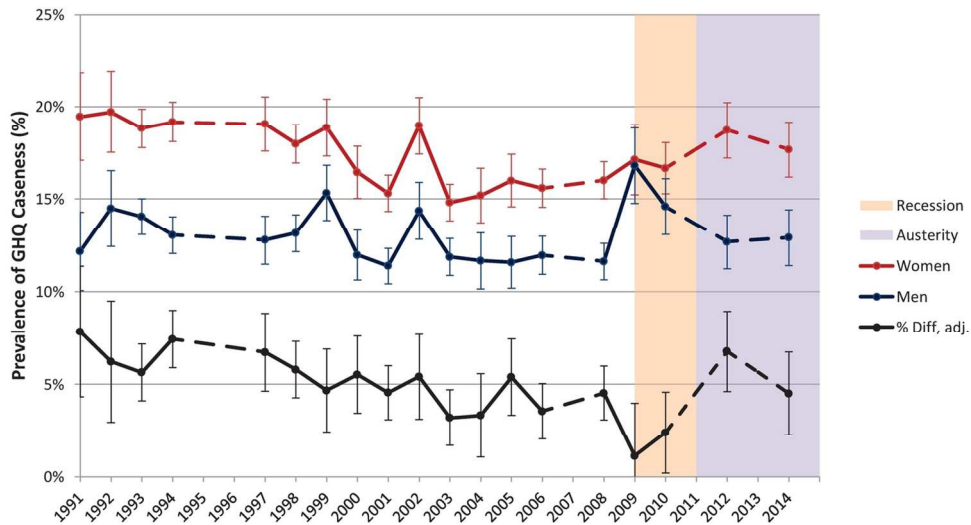

130x80mm (300 x 300 DPI)

1  
2  
3  
4  
5  
6  
7  
8  
9  
10  
11  
12  
13  
14  
15  
16  
17  
18  
19  
20  
21  
22  
23  
24  
25  
26  
27  
28  
29  
30  
31  
32  
33  
34  
35  
36  
37  
38  
39  
40  
41  
42  
43  
44  
45  
46  
47  
48  
49  
50  
51  
52  
53  
54  
55  
56  
57  
58  
59  
60

**Figure 2: Age-sex standardised GHQ caseness by IMD quintile in 25-64 year olds, 2001-2014**

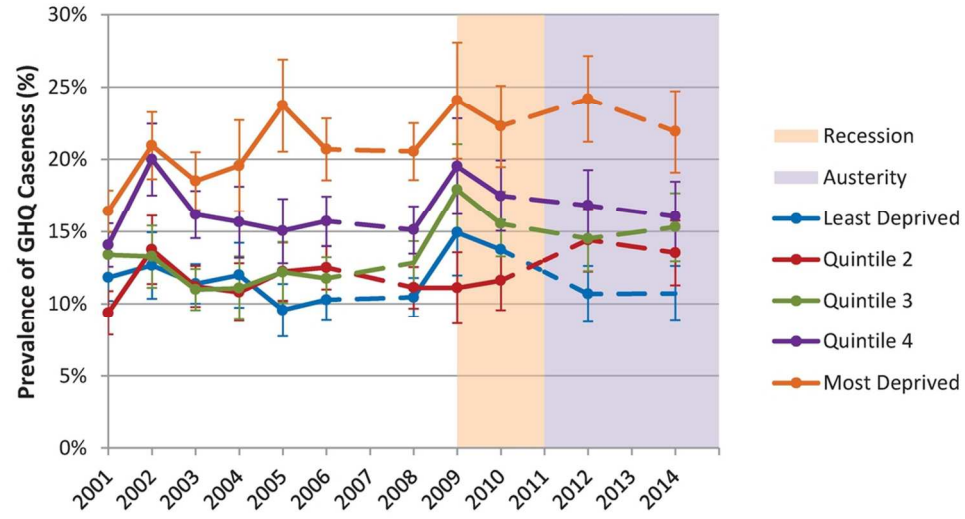

99x63mm (300 x 300 DPI)

view only

**Figure 3: Age-sex standardised GHQ caseness by education level in 25-64 year olds, 1991-2014**

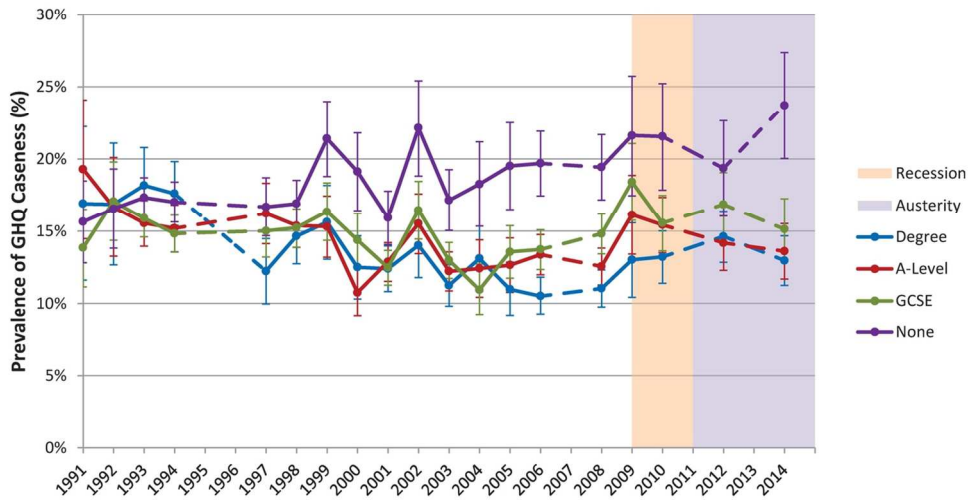

119x71mm (300 x 300 DPI)



1  
2  
3  
4  
5  
6  
7  
8  
9  
10  
11  
12  
13  
14  
15  
16  
17  
18  
19  
20  
21  
22  
23  
24  
25  
26  
27  
28  
29  
30  
31  
32  
33  
34  
35  
36  
37  
38  
39  
40  
41  
42  
43  
44  
45  
46  
47  
48  
49  
50  
51  
52  
53  
54  
55  
56  
57  
58  
59  
60

**Figure 4: Relative index of inequality in GHQ caseness in 25-64 year olds, 1991-2014**

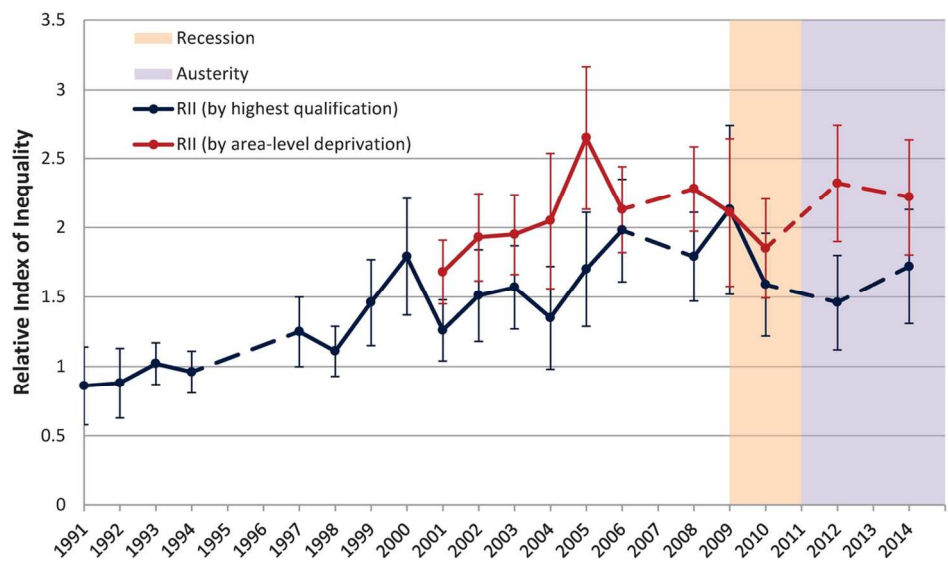

119x79mm (300 x 300 DPI)

**Supplementary Appendix****Appendix 1: Characteristics of study participants**

| Year |        | Gender (%) | Age Group (%) |       |       |       | Highest Education Level (%) |         |      |      | Sample | Total Sample |
|------|--------|------------|---------------|-------|-------|-------|-----------------------------|---------|------|------|--------|--------------|
|      |        |            | 25-34         | 35-44 | 45-54 | 55-64 | Degree                      | A-Level | GCSE | None |        |              |
| 1991 | Male   | 46.6       | 29.7          | 27.6  | 21.9  | 20.8  | 16.0                        | 20.1    | 32.1 | 31.9 | 942    | 2020         |
|      | Female | 53.4       | 30.0          | 27.2  | 21.7  | 21.2  | 8.1                         | 17.3    | 34.0 | 40.6 | 1078   |              |
| 1992 | Male   | 48.4       | 28.6          | 28.4  | 23.8  | 19.2  | 15.2                        | 26.0    | 32.5 | 26.3 | 1184   | 2500         |
|      | Female | 51.6       | 29.8          | 28.4  | 21.7  | 20.1  | 8.7                         | 18.5    | 37.9 | 34.9 | 1316   |              |
| 1993 | Male   | 47.6       | 29.2          | 26.1  | 24.9  | 19.8  | 16.4                        | 25.4    | 30.1 | 28.2 | 5030   | 10,574       |
|      | Female | 52.4       | 30.2          | 27.0  | 23.8  | 19.0  | 9.6                         | 18.2    | 35.9 | 36.2 | 5544   |              |
| 1994 | Male   | 46.7       | 29.5          | 27.3  | 23.0  | 20.2  | 15.9                        | 26.5    | 30.0 | 27.5 | 4704   | 10,065       |
|      | Female | 53.3       | 31.0          | 27.2  | 23.1  | 18.8  | 10.4                        | 18.0    | 37.9 | 33.7 | 5361   |              |
| 1997 | Male   | 47.2       | 27.7          | 27.4  | 25.5  | 19.4  | 19.2                        | 28.7    | 28.3 | 23.8 | 2559   | 5419         |
|      | Female | 52.8       | 30.6          | 27.2  | 24.5  | 17.7  | 14.0                        | 21.3    | 33.7 | 31.0 | 2860   |              |
| 1998 | Male   | 46.6       | 27.7          | 26.9  | 25.8  | 19.6  | 19.5                        | 28.0    | 29.5 | 23.1 | 4582   | 9836         |
|      | Female | 53.4       | 29.0          | 28.0  | 24.7  | 18.3  | 14.3                        | 20.6    | 36.0 | 29.2 | 5254   |              |
| 1999 | Male   | 47.0       | 25.4          | 28.1  | 25.4  | 21.0  | 21.0                        | 28.5    | 27.5 | 23.0 | 2257   | 4800         |
|      | Female | 53.0       | 27.4          | 29.9  | 25.7  | 17.0  | 15.5                        | 21.6    | 34.4 | 28.6 | 2543   |              |
| 2000 | Male   | 45.8       | 25.9          | 29.7  | 23.4  | 21.0  | 21.7                        | 30.3    | 27.0 | 21.0 | 2311   | 5044         |
|      | Female | 54.2       | 27.6          | 30.5  | 23.3  | 18.5  | 16.5                        | 25.0    | 34.1 | 24.4 | 2733   |              |
| 2001 | Male   | 45.6       | 24.2          | 28.3  | 25.6  | 21.9  | 22.7                        | 29.2    | 29.4 | 18.7 | 4360   | 9553         |
|      | Female | 54.4       | 25.6          | 30.7  | 25.0  | 18.7  | 17.2                        | 23.6    | 35.3 | 23.9 | 5193   |              |
| 2002 | Male   | 43.4       | 23.0          | 31.5  | 23.8  | 21.7  | 23.1                        | 31.6    | 28.2 | 17.2 | 2016   | 4649         |
|      | Female | 56.6       | 27.8          | 32.1  | 22.0  | 18.2  | 19.4                        | 25.1    | 36.2 | 19.3 | 2633   |              |
| 2003 | Male   | 45.5       | 22.6          | 28.6  | 24.4  | 24.3  | 23.6                        | 28.0    | 29.7 | 18.7 | 4117   | 9058         |
|      | Female | 54.6       | 23.9          | 30.6  | 23.3  | 22.1  | 20.4                        | 24.0    | 34.8 | 20.8 | 4941   |              |

1  
2  
3  
4  
5  
6  
7  
8  
9  
10  
11  
12  
13  
14  
15  
16  
17  
18  
19  
20  
21  
22  
23  
24  
25  
26  
27  
28  
29  
30  
31  
32  
33  
34  
35  
36  
37  
38  
39  
40  
41  
42  
43  
44  
45  
46  
47

|             |        |      |      |      |      |      |      |      |      |      |      |             |
|-------------|--------|------|------|------|------|------|------|------|------|------|------|-------------|
| <b>2004</b> | Male   | 43.4 | 23.2 | 27.7 | 22.8 | 26.3 | 25.4 | 27.7 | 27.1 | 19.9 | 1782 |             |
|             | Female | 56.6 | 21.8 | 30.3 | 24.3 | 23.5 | 21.1 | 24.3 | 31.9 | 22.8 | 2327 | <b>4109</b> |
| <b>2005</b> | Male   | 44.8 | 22.0 | 25.0 | 26.9 | 26.0 | 25.5 | 29.0 | 26.7 | 18.8 | 2076 |             |
|             | Female | 55.2 | 22.9 | 27.9 | 26.1 | 23.2 | 22.1 | 23.4 | 32.6 | 21.9 | 2555 | <b>4631</b> |
| <b>2006</b> | Male   | 44.8 | 19.9 | 28.2 | 25.0 | 26.9 | 27.2 | 29.9 | 25.6 | 17.3 | 3896 |             |
|             | Female | 55.2 | 22.2 | 29.2 | 24.7 | 23.8 | 24.2 | 24.3 | 32.1 | 19.4 | 4795 | <b>8691</b> |
| <b>2008</b> | Male   | 44.8 | 21.1 | 27.2 | 24.8 | 26.9 | 27.2 | 30.1 | 25.9 | 16.8 | 4165 |             |
|             | Female | 55.2 | 22.7 | 27.9 | 25.4 | 24.1 | 24.5 | 26.3 | 30.9 | 18.3 | 5135 | <b>9300</b> |
| <b>2009</b> | Male   | 45.6 | 20.7 | 27.8 | 25.9 | 25.7 | 27.4 | 26.8 | 29.3 | 16.5 | 1278 |             |
|             | Female | 54.5 | 22.6 | 29.7 | 24.2 | 23.4 | 25.9 | 24.4 | 32.7 | 17.2 | 1528 | <b>2806</b> |
| <b>2010</b> | Male   | 43.5 | 20.3 | 26.1 | 26.7 | 26.8 | 29.6 | 30.2 | 26.6 | 13.6 | 2123 |             |
|             | Female | 56.5 | 22.1 | 26.8 | 28.2 | 22.9 | 27.5 | 26.6 | 32.0 | 13.9 | 2759 | <b>4882</b> |
| <b>2012</b> | Male   | 43.6 | 19.8 | 26.1 | 26.8 | 27.4 | 32.2 | 29.8 | 24.3 | 13.7 | 2025 |             |
|             | Female | 56.5 | 22.9 | 26.1 | 28.2 | 22.9 | 32.3 | 27.1 | 26.5 | 14.1 | 2625 | <b>4650</b> |
| <b>2014</b> | Male   | 43.3 | 19.2 | 26.7 | 29.8 | 24.3 | 34.2 | 27.9 | 24.6 | 13.4 | 1964 |             |
|             | Female | 56.7 | 22.7 | 27.6 | 28.3 | 21.4 | 33.6 | 28.3 | 25.8 | 12.4 | 2568 | <b>4532</b> |

| Year        |        | Gender (%) | Age Group (%) |       |       |       | IMD Quintile       |      |      |      |                   | Sample | Total Sample |
|-------------|--------|------------|---------------|-------|-------|-------|--------------------|------|------|------|-------------------|--------|--------------|
|             |        |            | 25-34         | 35-44 | 45-54 | 55-64 | 1 (Least Deprived) | 2    | 3    | 4    | 5 (Most Deprived) |        |              |
| <b>2001</b> | Male   | 44.8       | 24.0          | 27.8  | 26.1  | 22.2  | 16.7               | 15.2 | 19.2 | 21.0 | 28.0              | 4211   |              |
|             | Female | 55.2       | 24.8          | 29.6  | 25.6  | 20.1  | 16.4               | 14.8 | 20.0 | 22.1 | 26.8              | 5184   | <b>9395</b>  |
| <b>2002</b> | Male   | 42.7       | 22.9          | 31.1  | 23.9  | 22.1  | 16.6               | 16.6 | 18.6 | 22.2 | 26.0              | 2080   |              |
|             | Female | 57.3       | 26.8          | 31.0  | 22.7  | 19.6  | 17.2               | 16.0 | 19.0 | 21.6 | 26.2              | 2794   | <b>4874</b>  |
| <b>2003</b> | Male   | 44.6       | 22.7          | 28.4  | 24.5  | 24.5  | 22.6               | 20.8 | 19.9 | 20.7 | 16.1              | 4204   |              |
|             | Female | 55.4       | 23.1          | 29.7  | 23.4  | 23.8  | 23.2               | 20.1 | 19.8 | 20.7 | 16.2              | 5229   | <b>9433</b>  |
| <b>2004</b> | Male   | 42.9       | 23.2          | 27.7  | 22.8  | 26.3  | 23.4               | 23.2 | 19.1 | 20.3 | 14.1              | 1786   |              |
|             | Female | 57.1       | 21.3          | 29.8  | 24.3  | 24.6  | 22.3               | 22.8 | 17.8 | 19.9 | 17.2              | 2380   | <b>4166</b>  |

|             |        |      |      |      |      |      |      |      |      |      |      |      |             |
|-------------|--------|------|------|------|------|------|------|------|------|------|------|------|-------------|
| <b>2005</b> | Male   | 44.3 | 22.0 | 25.0 | 26.9 | 26.2 | 23.2 | 21.3 | 20.5 | 20.6 | 14.5 | 2082 |             |
|             | Female | 55.7 | 22.4 | 27.4 | 25.9 | 24.3 | 22.2 | 21.6 | 19.1 | 20.7 | 16.4 | 2618 | <b>4700</b> |
| <b>2006</b> | Male   | 44.4 | 19.8 | 28.2 | 25.0 | 26.9 | 20.9 | 21.4 | 21.4 | 19.8 | 16.5 | 3907 |             |
|             | Female | 55.6 | 22.0 | 28.8 | 24.6 | 24.7 | 20.2 | 22.7 | 21.0 | 19.4 | 16.7 | 4888 | <b>8795</b> |
| <b>2008</b> | Male   | 44.4 | 21.1 | 27.2 | 24.7 | 27.0 | 22.3 | 20.3 | 19.9 | 19.4 | 18.1 | 4169 |             |
|             | Female | 55.6 | 22.3 | 27.5 | 25.2 | 25.0 | 22.6 | 19.9 | 20.0 | 19.2 | 18.3 | 5230 | <b>9399</b> |
| <b>2009</b> | Male   | 45.1 | 20.6 | 27.8 | 25.8 | 25.8 | 20.4 | 22.4 | 20.4 | 20.0 | 16.9 | 1282 |             |
|             | Female | 54.9 | 22.3 | 29.3 | 24.3 | 24.2 | 20.6 | 21.4 | 21.2 | 20.0 | 16.7 | 1559 | <b>2841</b> |
| <b>2010</b> | Male   | 43.1 | 20.3 | 26.1 | 26.7 | 26.9 | 23.4 | 19.8 | 20.0 | 19.0 | 17.9 | 2129 |             |
|             | Female | 56.9 | 21.9 | 26.6 | 28.1 | 23.6 | 23.7 | 19.7 | 20.0 | 19.5 | 17.3 | 2806 | <b>4935</b> |
| <b>2012</b> | Male   | 43.4 | 19.8 | 26.1 | 26.9 | 27.3 | 22.1 | 21.1 | 20.2 | 19.3 | 17.4 | 2030 |             |
|             | Female | 56.6 | 22.8 | 25.9 | 28.0 | 23.4 | 22.7 | 20.7 | 19.9 | 19.2 | 17.6 | 2649 | <b>4679</b> |
| <b>2014</b> | Male   | 43.2 | 19.3 | 26.6 | 29.9 | 24.3 | 23.5 | 20.3 | 18.4 | 18.7 | 19.1 | 1969 |             |
|             | Female | 56.8 | 22.6 | 27.6 | 28.1 | 21.8 | 21.7 | 19.6 | 20.0 | 19.7 | 19.1 | 2592 | <b>4561</b> |

**Appendix 2: Age-standardised GHQ caseness in men and women aged 25-64 years, 1991-2014**

(displayed in Figure 1 in main text)

| Year | Men         |                   |              |              | Women       |                   |              |              |
|------|-------------|-------------------|--------------|--------------|-------------|-------------------|--------------|--------------|
|      | Sample Size | Adjusted Est. (%) | Lower 95% CI | Upper 95% CI | Sample Size | Adjusted Est. (%) | Lower 95% CI | Upper 95% CI |
| 1991 | 942         | 12.17             | 10.06        | 14.28        | 1078        | 19.46             | 17.08        | 21.84        |
| 1992 | 1184        | 14.48             | 12.44        | 16.52        | 1316        | 19.71             | 17.52        | 21.90        |
| 1993 | 5030        | 14.04             | 13.07        | 15.01        | 5544        | 18.82             | 17.78        | 19.86        |
| 1994 | 4704        | 13.04             | 12.06        | 14.02        | 5361        | 19.17             | 18.10        | 20.24        |
| 1997 | 2559        | 12.77             | 11.47        | 14.07        | 2860        | 19.06             | 17.60        | 20.52        |
| 1998 | 4582        | 13.14             | 12.15        | 14.13        | 5254        | 17.98             | 16.94        | 19.03        |
| 1999 | 2257        | 15.32             | 13.83        | 16.81        | 2543        | 18.87             | 17.33        | 20.41        |
| 2000 | 2311        | 11.97             | 10.63        | 13.30        | 2733        | 16.44             | 15.03        | 17.85        |
| 2001 | 4360        | 11.38             | 10.43        | 12.32        | 5193        | 15.30             | 14.31        | 16.28        |
| 2002 | 2016        | 14.35             | 12.81        | 15.89        | 2633        | 18.97             | 17.44        | 20.50        |
| 2003 | 4117        | 11.86             | 10.87        | 12.85        | 4941        | 14.80             | 13.81        | 15.80        |
| 2004 | 1782        | 11.66             | 10.16        | 13.17        | 2327        | 15.18             | 13.71        | 16.64        |
| 2005 | 2076        | 11.57             | 10.19        | 12.94        | 2555        | 15.99             | 14.57        | 17.41        |
| 2006 | 3896        | 11.95             | 10.93        | 12.98        | 4795        | 15.58             | 14.55        | 16.61        |
| 2008 | 4165        | 11.62             | 10.64        | 12.60        | 5135        | 16.01             | 15.01        | 17.02        |
| 2009 | 1278        | 16.80             | 14.75        | 18.86        | 1528        | 17.13             | 15.23        | 19.04        |
| 2010 | 2123        | 14.58             | 13.07        | 16.09        | 2759        | 16.66             | 15.27        | 18.05        |
| 2012 | 2025        | 12.67             | 11.22        | 14.11        | 2625        | 18.72             | 17.22        | 20.21        |
| 2014 | 1964        | 12.90             | 11.40        | 14.40        | 2568        | 17.67             | 16.19        | 19.15        |

**Appendix 3: Adjusted odds ratio and % point difference in GHQ caseness by gender, 1991-2014**

(displayed in Figure 1 in main text)

|      | Model 1: Adjusted for age |         |                    | Model 2: Adjusted for age, education, employment |         |                   |
|------|---------------------------|---------|--------------------|--------------------------------------------------|---------|-------------------|
| Year | OR (95% CI)               | p-value | % Diff. (95% CI)   | OR (95% CI)                                      | p-value | % Diff. (95% CI)  |
| 1991 | 1.76 (1.38-2.26)          | <0.001  | 7.61 (4.31-10.90)  | 1.83 (1.39-2.40)                                 | <0.001  | 7.85 (4.33-11.37) |
| 1992 | 1.48 (1.20-1.83)          | <0.001  | 5.53 (2.53-8.52)   | 1.57 (1.24-1.98)                                 | <0.001  | 6.23 (2.95-9.50)  |
| 1993 | 1.43 (1.28-1.58)          | <0.001  | 4.91 (3.47-6.35)   | 1.52 (1.35-1.70)                                 | <0.001  | 5.64 (4.11-7.17)  |
| 1994 | 1.60 (1.44-1.79)          | <0.001  | 6.42 (4.94-7.89)   | 1.76 (1.57-1.98)                                 | <0.001  | 7.44 (5.89-9.00)  |
| 1997 | 1.60 (1.38-1.85)          | <0.001  | 6.31 (4.31-8.31)   | 1.68 (1.43-1.98)                                 | <0.001  | 6.73 (4.63-8.84)  |
| 1998 | 1.47 (1.32-1.64)          | <0.001  | 5.11 (3.65-6.58)   | 1.58 (1.40-1.78)                                 | <0.001  | 5.79 (4.26-7.33)  |
| 1999 | 1.29 (1.11-1.51)          | 0.001   | 3.68 (1.52-5.83)   | 1.41 (1.20-1.67)                                 | <0.001  | 4.67 (2.42-6.91)  |
| 2000 | 1.45 (1.23-1.70)          | <0.001  | 4.56 (2.58-6.54)   | 1.62 (1.35-1.95)                                 | <0.001  | 5.52 (3.43-7.61)  |
| 2001 | 1.41 (1.25-1.59)          | <0.001  | 4.04 (2.64-5.45)   | 1.51 (1.32-1.72)                                 | <0.001  | 4.55 (3.10-6.01)  |
| 2002 | 1.41 (1.20-1.65)          | <0.001  | 4.77 (2.55-6.98)   | 1.50 (1.26-1.79)                                 | <0.001  | 5.41 (3.11-7.71)  |
| 2003 | 1.27 (1.12-1.44)          | <0.001  | 2.74 (1.30-4.17)   | 1.34 (1.17-1.54)                                 | <0.001  | 3.19 (1.69-4.69)  |
| 2004 | 1.33 (1.10-1.60)          | 0.004   | 3.22 (1.07-5.37)   | 1.36 (1.10-1.69)                                 | 0.004   | 3.32 (1.06-5.57)  |
| 2005 | 1.49 (1.25-1.78)          | <0.001  | 4.68 (2.67-6.70)   | 1.65 (1.36-2.01)                                 | <0.001  | 5.39 (3.32-7.45)  |
| 2006 | 1.32 (1.16-1.50)          | <0.001  | 3.23 (1.73-4.72)   | 1.39 (1.21-1.60)                                 | <0.001  | 3.54 (2.03-5.05)  |
| 2008 | 1.45 (1.28-1.64)          | <0.001  | 4.35 (2.91-5.79)   | 1.53 (1.33-1.75)                                 | <0.001  | 4.53 (3.07-5.99)  |
| 2009 | 0.98 (0.80-1.21)          | 0.866   | -0.25 (-3.12-2.62) | 1.09 (0.87-1.37)                                 | 0.446   | 1.12 (-1.75-3.98) |
| 2010 | 1.17 (0.99-1.39)          | 0.065   | 2.08 (-0.11-4.27)  | 1.22 (1.01-1.46)                                 | 0.034   | 2.39 (0.19-4.58)  |
| 2012 | 1.57 (1.32-1.86)          | <0.001  | 5.93 (3.70-8.15)   | 1.79 (1.48-2.16)                                 | <0.001  | 6.78 (4.61-8.94)  |
| 2014 | 1.42 (1.19-1.70)          | <0.001  | 4.53 (2.28-6.78)   | 1.43 (1.19-1.71)                                 | <0.001  | 4.51 (2.27-6.75)  |

## Appendix 4: Full multiple logistic regression models for participants of each gender, 2001-2014

| Regression models for men (n=24,930)   |                                |         |              |              |                                            |         |              |              |                                                    |         |              |              |
|----------------------------------------|--------------------------------|---------|--------------|--------------|--------------------------------------------|---------|--------------|--------------|----------------------------------------------------|---------|--------------|--------------|
|                                        | Model 1: Adjusted for age, IMD |         |              |              | Model 2: Adjusted for age, IMD, employment |         |              |              | Model 3: Adjusted for age, IMD, employment, income |         |              |              |
| Year                                   | Odds Ratio                     | p-value | Lower 95% CI | Upper 95% CI | Odds Ratio                                 | p-value | Lower 95% CI | Upper 95% CI | Odds Ratio                                         | p-value | Lower 95% CI | Upper 95% CI |
| 2001                                   | 0.93                           | 0.330   | 0.80         | 1.08         | 0.89                                       | 0.147   | 0.76         | 1.04         | 0.86                                               | 0.069   | 0.73         | 1.01         |
| 2002                                   | 1.27                           | 0.007   | 1.07         | 1.51         | 1.29                                       | 0.006   | 1.07         | 1.54         | 1.26                                               | 0.014   | 1.05         | 1.51         |
| 2003                                   | 1.06                           | 0.481   | 0.91         | 1.23         | 0.97                                       | 0.667   | 0.82         | 1.13         | 0.94                                               | 0.475   | 0.80         | 1.11         |
| 2004                                   | 1.11                           | 0.272   | 0.92         | 1.35         | 1.07                                       | 0.505   | 0.87         | 1.31         | 1.05                                               | 0.646   | 0.86         | 1.29         |
| 2005                                   | 1.03                           | 0.722   | 0.86         | 1.24         | 0.92                                       | 0.400   | 0.76         | 1.12         | 0.90                                               | 0.303   | 0.74         | 1.10         |
| 2006                                   | 1.06                           | 0.476   | 0.91         | 1.24         | 1.04                                       | 0.676   | 0.88         | 1.22         | 1.03                                               | 0.765   | 0.87         | 1.21         |
| 2008                                   | 1.00                           | -       | -            | -            | 1.00                                       | -       | -            | -            | 1.00                                               | -       | -            | -            |
| 2009                                   | 1.64                           | <0.001  | 1.34         | 2.00         | 1.55                                       | <0.001  | 1.25         | 1.93         | 1.53                                               | <0.001  | 1.24         | 1.91         |
| 2010                                   | 1.28                           | 0.009   | 1.06         | 1.53         | 1.26                                       | 0.021   | 1.04         | 1.52         | 1.26                                               | 0.018   | 1.04         | 1.53         |
| 2012                                   | 1.15                           | 0.147   | 0.95         | 1.38         | 1.10                                       | 0.340   | 0.91         | 1.33         | 1.10                                               | 0.342   | 0.91         | 1.33         |
| 2014                                   | 1.13                           | 0.215   | 0.93         | 1.37         | 1.17                                       | 0.126   | 0.96         | 1.43         | 1.18                                               | 0.108   | 0.96         | 1.44         |
| Regression models for women (n=31,413) |                                |         |              |              |                                            |         |              |              |                                                    |         |              |              |
|                                        | Model 1: Adjusted for age, IMD |         |              |              | Model 2: Adjusted for age, IMD, employment |         |              |              | Model 3: Adjusted for age, IMD, employment, income |         |              |              |
| Year                                   | Odds Ratio                     | p-value | Lower 95% CI | Upper 95% CI | Odds Ratio                                 | p-value | Lower 95% CI | Upper 95% CI | Odds Ratio                                         | p-value | Lower 95% CI | Upper 95% CI |
| 2001                                   | 0.94                           | 0.280   | 0.83         | 1.05         | 0.91                                       | 0.143   | 0.81         | 1.03         | 0.87                                               | 0.030   | 0.78         | 0.99         |
| 2002                                   | 1.14                           | 0.049   | 1.00         | 1.31         | 1.13                                       | 0.078   | 0.99         | 1.30         | 1.10                                               | 0.162   | 0.96         | 1.27         |
| 2003                                   | 0.92                           | 0.192   | 0.82         | 1.04         | 0.91                                       | 0.112   | 0.80         | 1.02         | 0.87                                               | 0.026   | 0.77         | 0.98         |
| 2004                                   | 0.93                           | 0.358   | 0.80         | 1.08         | 0.91                                       | 0.218   | 0.78         | 1.06         | 0.88                                               | 0.112   | 0.75         | 1.03         |
| 2005                                   | 1.06                           | 0.426   | 0.92         | 1.22         | 1.05                                       | 0.531   | 0.91         | 1.21         | 1.02                                               | 0.762   | 0.88         | 1.18         |
| 2006                                   | 0.91                           | 0.153   | 0.81         | 1.03         | 0.90                                       | 0.102   | 0.80         | 1.02         | 0.89                                               | 0.077   | 0.79         | 1.01         |
| 2008                                   | 1.00                           | -       | -            | -            | 1.00                                       | -       | -            | -            | 1.00                                               | -       | -            | -            |
| 2009                                   | 1.06                           | 0.537   | 0.89         | 1.25         | 1.07                                       | 0.429   | 0.90         | 1.28         | 1.07                                               | 0.431   | 0.90         | 1.28         |
| 2010                                   | 1.00                           | 0.980   | 0.86         | 1.15         | 0.99                                       | 0.849   | 0.85         | 1.14         | 0.99                                               | 0.922   | 0.86         | 1.15         |
| 2012                                   | 1.24                           | 0.003   | 1.08         | 1.42         | 1.24                                       | 0.003   | 1.07         | 1.43         | 1.25                                               | 0.002   | 1.09         | 1.45         |
| 2014                                   | 1.10                           | 0.208   | 0.95         | 1.27         | 1.11                                       | 0.171   | 0.96         | 1.28         | 1.12                                               | 0.138   | 0.97         | 1.29         |

**Appendix 5: Age-sex standardised GHQ caseness by IMD quintile in 25–64-year-olds, 2001-2014**

(displayed in Figure 2 in main text)

| Year        | Quintile   | Sample Size | Adjusted Est. (%) | Lower 95% CI | Upper 95% CI | Year        | Quintile   | Sample Size | Adjusted Est. (%) | Lower 95% CI | Upper 95% CI |
|-------------|------------|-------------|-------------------|--------------|--------------|-------------|------------|-------------|-------------------|--------------|--------------|
| <b>2001</b> | Least Dep. | 1549        | 11.80             | 10.20        | 13.41        | <b>2002</b> | Least Dep. | 825         | 12.65             | 10.35        | 14.94        |
|             | 2          | 1403        | 9.36              | 7.83         | 10.88        |             | 2          | 794         | 13.74             | 11.37        | 16.11        |
|             | 3          | 1846        | 13.38             | 11.83        | 14.94        |             | 3          | 916         | 13.26             | 11.11        | 15.42        |
|             | 4          | 2030        | 14.06             | 12.56        | 15.57        |             | 4          | 1065        | 19.99             | 17.52        | 22.46        |
|             | Most Dep.  | 2567        | 16.42             | 14.97        | 17.88        |             | Most Dep.  | 1274        | 20.94             | 18.64        | 23.24        |
| <b>2003</b> | Least Dep. | 2163        | 11.38             | 10.00        | 12.75        | <b>2004</b> | Least Dep. | 948         | 11.98             | 9.73         | 14.22        |
|             | 2          | 1924        | 11.19             | 9.78         | 12.61        |             | 2          | 957         | 10.79             | 8.78         | 12.80        |
|             | 3          | 1872        | 10.98             | 9.55         | 12.40        |             | 3          | 764         | 11.07             | 8.87         | 13.28        |
|             | 4          | 1950        | 16.18             | 14.54        | 17.83        |             | 4          | 836         | 15.66             | 13.18        | 18.13        |
|             | Most Dep.  | 1524        | 18.51             | 16.53        | 20.49        |             | Most Dep.  | 661         | 19.56             | 16.43        | 22.70        |
| <b>2005</b> | Least Dep. | 1064        | 9.55              | 7.73         | 11.37        | <b>2006</b> | Least Dep. | 1806        | 10.27             | 8.81         | 11.73        |
|             | 2          | 1008        | 12.23             | 10.22        | 14.24        |             | 2          | 1943        | 12.50             | 11.00        | 13.99        |
|             | 3          | 927         | 12.18             | 10.08        | 14.27        |             | 3          | 1864        | 11.75             | 10.28        | 13.21        |
|             | 4          | 970         | 15.05             | 12.81        | 17.28        |             | 4          | 1719        | 15.71             | 13.97        | 17.45        |
|             | Most Dep.  | 731         | 23.72             | 20.53        | 26.92        |             | Most Dep.  | 1463        | 20.68             | 18.56        | 22.80        |
| <b>2008</b> | Least Dep. | 2108        | 10.44             | 9.10         | 11.78        | <b>2009</b> | Least Dep. | 582         | 14.92             | 11.95        | 17.90        |
|             | 2          | 1889        | 11.11             | 9.67         | 12.54        |             | 2          | 621         | 11.09             | 8.62         | 13.57        |
|             | 3          | 1877        | 12.83             | 11.33        | 14.33        |             | 3          | 593         | 17.91             | 14.79        | 21.03        |
|             | 4          | 1815        | 15.12             | 13.47        | 16.76        |             | 4          | 568         | 19.51             | 16.21        | 22.81        |
|             | Most Dep.  | 1710        | 20.54             | 18.59        | 22.50        |             | Most Dep.  | 477         | 24.07             | 20.06        | 28.08        |
| <b>2010</b> | Least Dep. | 1162        | 13.73             | 11.66        | 15.81        | <b>2012</b> | Least Dep. | 1048        | 10.67             | 8.72         | 12.62        |
|             | 2          | 973         | 11.60             | 9.55         | 13.65        |             | 2          | 977         | 14.40             | 12.22        | 16.58        |
|             | 3          | 985         | 15.53             | 13.28        | 17.78        |             | 3          | 937         | 14.50             | 12.26        | 16.75        |
|             | 4          | 951         | 17.48             | 15.05        | 19.92        |             | 4          | 899         | 16.83             | 14.40        | 19.26        |
|             | Most Dep.  | 864         | 22.28             | 19.47        | 25.09        |             | Most Dep.  | 818         | 24.18             | 21.21        | 27.16        |
| <b>2014</b> | Least Dep. | 1024        | 10.71             | 8.80         | 12.62        |             |            |             |                   |              |              |
|             | 2          | 907         | 13.52             | 11.27        | 15.76        |             |            |             |                   |              |              |
|             | 3          | 880         | 15.30             | 12.93        | 17.67        |             |            |             |                   |              |              |
|             | 4          | 879         | 16.04             | 13.61        | 18.48        |             |            |             |                   |              |              |
|             | Most Dep.  | 871         | 21.91             | 19.10        | 24.73        |             |            |             |                   |              |              |



**Appendix 6: Age-sex standardised GHQ caseness by education level in 25–64-year-olds, 1991-2014**

(displayed in Figure 3 in main text)

| Year        | Educ. Level | Sample Size | Adjusted Est. (%) | Lower 95% CI | Upper 95% CI | Year        | Educ. Level | Sample Size | Adjusted Est. (%) | Lower 95% CI | Upper 95% CI |
|-------------|-------------|-------------|-------------------|--------------|--------------|-------------|-------------|-------------|-------------------|--------------|--------------|
| <b>1991</b> | Degree      | 238         | 16.92             | 11.61        | 22.24        | <b>1992</b> | Degree      | 295         | 16.88             | 12.67        | 21.09        |
|             | A-Level     | 375         | 19.29             | 14.49        | 24.08        |             | A-Level     | 551         | 16.69             | 13.28        | 20.10        |
|             | GCSE        | 669         | 13.85             | 11.15        | 16.54        |             | GCSE        | 884         | 17.08             | 14.36        | 19.79        |
|             | None        | 738         | 15.65             | 12.81        | 18.48        |             | None        | 770         | 16.57             | 13.83        | 19.30        |
| <b>1993</b> | Degree      | 1356        | 18.18             | 15.56        | 20.79        | <b>1994</b> | Degree      | 1308        | 17.61             | 15.39        | 19.82        |
|             | A-Level     | 2286        | 15.55             | 13.96        | 17.14        |             | A-Level     | 2213        | 15.20             | 13.57        | 16.83        |
|             | GCSE        | 3508        | 15.90             | 14.61        | 17.18        |             | GCSE        | 3445        | 14.83             | 13.55        | 16.11        |
|             | None        | 3424        | 17.34             | 15.98        | 18.70        |             | None        | 3099        | 17.03             | 15.65        | 18.41        |
| <b>1997</b> | Degree      | 892         | 12.23             | 9.97         | 14.49        | <b>1998</b> | Degree      | 1642        | 14.66             | 12.75        | 16.56        |
|             | A-Level     | 1344        | 16.23             | 14.13        | 18.32        |             | A-Level     | 2362        | 15.38             | 13.88        | 16.88        |
|             | GCSE        | 1687        | 15.01             | 13.21        | 16.80        |             | GCSE        | 3243        | 15.23             | 13.90        | 16.56        |
|             | None        | 1496        | 16.69             | 14.69        | 18.70        |             | None        | 2589        | 16.92             | 15.30        | 18.53        |
| <b>1999</b> | Degree      | 868         | 15.62             | 13.07        | 18.17        | <b>2000</b> | Degree      | 952         | 12.50             | 10.31        | 14.68        |
|             | A-Level     | 1193        | 15.32             | 13.20        | 17.45        |             | A-Level     | 1382        | 10.75             | 9.08         | 12.42        |
|             | GCSE        | 1494        | 16.36             | 14.37        | 18.36        |             | GCSE        | 1558        | 14.38             | 12.53        | 16.23        |
|             | None        | 1245        | 21.39             | 18.80        | 23.98        |             | None        | 1152        | 19.12             | 16.45        | 21.80        |
| <b>2001</b> | Degree      | 1881        | 12.40             | 10.82        | 13.99        | <b>2002</b> | Degree      | 975         | 14.01             | 11.80        | 16.23        |
|             | A-Level     | 2501        | 12.87             | 11.54        | 14.20        |             | A-Level     | 1299        | 15.52             | 13.45        | 17.59        |
|             | GCSE        | 3115        | 12.47             | 11.27        | 13.67        |             | GCSE        | 1520        | 16.46             | 14.46        | 18.46        |
|             | None        | 2056        | 15.93             | 14.08        | 17.78        |             | None        | 855         | 22.12             | 18.83        | 25.42        |
| <b>2003</b> | Degree      | 1982        | 11.25             | 9.81         | 12.68        | <b>2004</b> | Degree      | 943         | 13.10             | 10.86        | 15.35        |
|             | A-Level     | 2339        | 12.22             | 10.87        | 13.57        |             | A-Level     | 1058        | 12.41             | 10.44        | 14.39        |
|             | GCSE        | 2940        | 12.98             | 11.74        | 14.22        |             | GCSE        | 1224        | 10.94             | 9.15         | 12.73        |
|             | None        | 1797        | 17.16             | 15.05        | 19.27        |             | None        | 884         | 18.26             | 15.36        | 21.17        |
| <b>2005</b> | Degree      | 1094        | 10.98             | 9.08         | 12.87        | <b>2006</b> | Degree      | 2217        | 10.51             | 9.19         | 11.83        |
|             | A-Level     | 1199        | 12.65             | 10.76        | 14.53        |             | A-Level     | 2332        | 13.37             | 11.98        | 14.76        |
|             | GCSE        | 1389        | 13.56             | 11.75        | 15.37        |             | GCSE        | 2536        | 13.73             | 12.36        | 15.11        |
|             | None        | 949         | 19.51             | 16.52        | 22.50        |             | None        | 1606        | 19.69             | 17.47        | 21.91        |
| <b>2008</b> | Degree      | 2388        | 11.04             | 9.76         | 12.32        | <b>2009</b> | Degree      | 745         | 13.01             | 10.43        | 15.59        |
|             | A-Level     | 2604        | 12.55             | 11.28        | 13.83        |             | A-Level     | 715         | 16.15             | 13.42        | 18.87        |
|             | GCSE        | 2669        | 14.82             | 13.44        | 16.20        |             | GCSE        | 873         | 18.41             | 15.76        | 21.06        |
|             | None        | 1639        | 19.43             | 17.18        | 21.68        |             | None        | 473         | 21.60             | 17.46        | 25.74        |
| <b>2010</b> | Degree      | 1387        | 13.21             | 11.40        | 15.02        | <b>2012</b> | Degree      | 1500        | 14.63             | 12.85        | 16.41        |
|             | A-Level     | 1375        | 15.43             | 13.51        | 17.35        |             | A-Level     | 1314        | 14.17             | 12.30        | 16.05        |
|             | GCSE        | 1447        | 15.56             | 13.64        | 17.49        |             | GCSE        | 1188        | 16.87             | 14.69        | 19.06        |
|             | None        | 673         | 21.54             | 17.86        | 25.22        |             | None        | 648         | 19.35             | 16.07        | 22.63        |
| <b>2014</b> | Degree      | 1533        | 12.96             | 11.25        | 14.67        |             |             |             |                   |              |              |
|             | A-Level     | 1273        | 13.61             | 11.68        | 15.53        |             |             |             |                   |              |              |

|  |      |      |       |       |       |  |  |  |  |  |  |
|--|------|------|-------|-------|-------|--|--|--|--|--|--|
|  | GCSE | 1145 | 15.13 | 13.00 | 17.26 |  |  |  |  |  |  |
|  | None | 581  | 23.71 | 20.04 | 27.38 |  |  |  |  |  |  |

For peer review only

**Appendix 7: Relative index of inequality in GHQ caseness, 1991-2014**

(displayed in Figure 4 in main text)

| Highest Education Level as Measure of SEP |                      |         |              |              | Area-Level Deprivation as Measure of SEP |                      |         |              |              |
|-------------------------------------------|----------------------|---------|--------------|--------------|------------------------------------------|----------------------|---------|--------------|--------------|
| Year                                      | Incidence Rate Ratio | p-value | Lower 95% CI | Upper 95% CI | Year                                     | Incidence Rate Ratio | p-value | Lower 95% CI | Upper 95% CI |
| 1991                                      | 0.86                 | 0.445   | 0.58         | 1.27         |                                          |                      |         |              |              |
| 1992                                      | 0.88                 | 0.458   | 0.63         | 1.23         |                                          |                      |         |              |              |
| 1993                                      | 1.02                 | 0.797   | 0.87         | 1.21         |                                          |                      |         |              |              |
| 1994                                      | 0.96                 | 0.634   | 0.81         | 1.14         |                                          |                      |         |              |              |
| 1997                                      | 1.25                 | 0.054   | 1.00         | 1.57         |                                          |                      |         |              |              |
| 1998                                      | 1.11                 | 0.232   | 0.93         | 1.32         |                                          |                      |         |              |              |
| 1999                                      | 1.46                 | 0.002   | 1.15         | 1.86         |                                          |                      |         |              |              |
| 2000                                      | 1.79                 | <0.001  | 1.37         | 2.33         |                                          |                      |         |              |              |
| 2001                                      | 1.26                 | 0.018   | 1.04         | 1.53         | 2001                                     | 1.68                 | <0.001  | 1.40         | 2.02         |
| 2002                                      | 1.51                 | 0.001   | 1.18         | 1.93         | 2002                                     | 1.93                 | <0.001  | 1.54         | 2.41         |
| 2003                                      | 1.57                 | <0.001  | 1.27         | 1.92         | 2003                                     | 1.95                 | <0.001  | 1.61         | 2.37         |
| 2004                                      | 1.35                 | 0.066   | 0.98         | 1.86         | 2004                                     | 2.05                 | <0.001  | 1.52         | 2.77         |
| 2005                                      | 1.70                 | <0.001  | 1.29         | 2.24         | 2005                                     | 2.65                 | <0.001  | 2.03         | 3.47         |
| 2006                                      | 1.98                 | <0.001  | 1.61         | 2.43         | 2006                                     | 2.13                 | <0.001  | 1.74         | 2.60         |
| 2008                                      | 1.79                 | <0.001  | 1.47         | 2.18         | 2008                                     | 2.28                 | <0.001  | 1.89         | 2.76         |
| 2009                                      | 2.13                 | <0.001  | 1.52         | 2.99         | 2009                                     | 2.11                 | <0.001  | 1.54         | 2.91         |
| 2010                                      | 1.59                 | 0.001   | 1.22         | 2.08         | 2010                                     | 1.85                 | <0.001  | 1.43         | 2.38         |
| 2012                                      | 1.46                 | 0.005   | 1.12         | 1.90         | 2012                                     | 2.32                 | <0.001  | 1.80         | 2.99         |
| 2014                                      | 1.72                 | <0.001  | 1.31         | 2.26         | 2014                                     | 2.22                 | <0.001  | 1.72         | 2.87         |

# BMJ Open

## Trends in gender and socioeconomic inequalities in mental health following the Great Recession and subsequent austerity policies: a repeat cross-sectional analysis of the Health Surveys for England

|                                 |                                                                                                                                                                                                                                                                                                     |
|---------------------------------|-----------------------------------------------------------------------------------------------------------------------------------------------------------------------------------------------------------------------------------------------------------------------------------------------------|
| Journal:                        | <i>BMJ Open</i>                                                                                                                                                                                                                                                                                     |
| Manuscript ID                   | bmjopen-2018-022924.R1                                                                                                                                                                                                                                                                              |
| Article Type:                   | Research                                                                                                                                                                                                                                                                                            |
| Date Submitted by the Author:   | 05-Jun-2018                                                                                                                                                                                                                                                                                         |
| Complete List of Authors:       | Thomson, Rachel; MRC/CSO Social & Public Health Sciences Unit, University of Glasgow; NHS Ayrshire and Arran, Public Health Niedzwiedz, Claire; University of Glasgow Institute of Health and Wellbeing Katikireddi, Srinivasa; MRC/CSO Social & Public Health Sciences Unit, University of Glasgow |
| <b>Primary Subject Heading</b>: | Mental health                                                                                                                                                                                                                                                                                       |
| Secondary Subject Heading:      | Epidemiology, Public health, Sociology, Health policy                                                                                                                                                                                                                                               |
| Keywords:                       | MENTAL HEALTH, PUBLIC HEALTH, SOCIAL MEDICINE, EPIDEMIOLOGY                                                                                                                                                                                                                                         |
|                                 |                                                                                                                                                                                                                                                                                                     |

SCHOLARONE™  
Manuscripts

1  
2  
3 **Trends in gender and socioeconomic inequalities in mental health following**  
4 **the Great Recession and subsequent austerity policies: a repeat cross-**  
5 **sectional analysis of the Health Surveys for England**  
6  
7  
8

9 Rachel M Thomson\*<sup>[1, 2]</sup>, Claire L Niedzwiedz<sup>[3]</sup>, Srinivasa Vittal Katikireddi<sup>[1]</sup>

10  
11 [1] MRC/CSO Social & Public Health Sciences Unit, University of Glasgow, UK

12  
13 [2] Public Health Department, NHS Ayrshire & Arran, UK

14  
15 [3] Institute of Health & Wellbeing, University of Glasgow, UK

16  
17 \*Corresponding author

18  
19 Postal address:

20  
21 Dr Rachel Thomson  
22 Public Health Dept, Afton House  
23 Ailsa Hospital Campus  
24 Dalmellington Road  
25 Ayr KA6 6AB

26  
27 Email rachel.thomson8@nhs.net

28  
29 Phone: 01292 885 858

30  
31  
32 **Word count** (excl. title page, abstract, references, figures and tables, declarations): 3315 words  
33  
34  
35  
36  
37  
38  
39  
40  
41  
42  
43  
44  
45  
46  
47  
48  
49  
50  
51  
52  
53  
54  
55  
56  
57  
58  
59  
60

**ABSTRACT**

**Objective:** It is known that mental health deteriorated following the 2008 global financial crisis, and that subsequent UK austerity policies post-2010 disproportionately impacted women and those in deprived areas. We aimed to assess whether gender and socioeconomic inequalities in poor mental health have changed since the onset of austerity policies.

**Design:** Repeat cross-sectional analysis of survey data.

**Setting:** England.

**Participants:** Nationally and regionally representative samples of the working age population (25-64 years) from the Health Survey for England (1991-2014).

**Outcome Measures:** Population-level poor mental health was measured by General Health Questionnaire-12 (GHQ) caseness, stratified by gender and socioeconomic position (area-level deprivation and highest educational attainment).

**Results:** The prevalence of age-adjusted male GHQ caseness increased by 5.9% (percentage points; 95% CI 3.2%-8.5%,  $P<0.001$ ) from 2008 to 2009 in the immediate post-recession period, but recovered to pre-recession levels after 2010. In women, there was little change in 2009 or 2010, but an increase of 3.0% (95% CI 1.0%-5.1%,  $p=0.004$ ) in 2012 compared to 2008 following the onset of austerity. Estimates were largely unchanged after further adjustment for socioeconomic position, employment status, and household income as potential mediators. Relative socioeconomic inequalities in GHQ caseness narrowed from 2008 to 2010 immediately following the recession, with relative index of inequality (RII) falling from 2.28 (95% CI 1.89-2.76,  $p<0.001$ ) to 1.85 (95% CI 1.43-2.38,  $p<0.001$ ), but returned to pre-recession levels during austerity.

**Conclusions:** Gender inequalities in poor mental health narrowed following the Great Recession but widened during austerity, creating the widest gender gap since 1994. Socioeconomic inequalities in poor mental health narrowed immediately post-recession, but this trend may now be reversing. Austerity policies could contribute to widening mental health inequalities.

**Keywords:** mental health; public health; social medicine; epidemiology

**ARTICLE SUMMARY***Strengths and limitations of this study*

- Data are from a large nationally and regionally representative survey, and our study considered trends over a long period of time using a validated measure of poor mental health.
- Inequalities in poor mental health were explored by both socioeconomic position (using two measures to demonstrate consistency of trends) and gender, rarely explicitly done in current literature.
- Lack of available data meant it was not possible to categorise individuals according to whether they were subject to specific austerity measures; further research with such data and a clear control group would strengthen arguments for causality.
- The use of cross-sectional rather than longitudinal data mean the ability to derive causal inferences is limited and further longitudinal work is required.

## INTRODUCTION

The health and social repercussions of the 2008 Great Recession are still being felt today.[1, 2] Much existing research has focused on the relationship between the economic downturn, rises in unemployment, and worsening mental health outcomes.[3, 4] Mirroring historical trends, in the aftermath of the recession there was an improvement in all-cause mortality across Europe,[5] paradoxically accompanied by a sharp rise in suicide rates which disproportionately impacted men.[6]

There has been a growing call to interpret trends in mental health outcomes in the context of the political decisions that followed,[7, 8] particularly given that there was marked cross-national variation in these outcomes.[9] It has been argued that the pursuit of austerity policies in response to the recession, usually involving large-scale public sector reforms, may actually have worsened health outcomes and delayed economic recovery.[10-12] It has also been postulated that austerity policies may worsen inequalities in health outcomes, as they frequently result in cutbacks to programs aiming to address inequitable distribution of the social determinants of health such as housing and education.[13]

The package of austerity measures implemented by the UK Government in 2010 was the third largest in Europe, with substantial cuts especially to welfare, health and social care.[14] Between 2010 and 2015, £26 billion worth of cuts were made to benefits, tax credits, pay and pensions in the UK,[15] with local authorities serving more deprived communities seeing greater financial losses.[16] 85% of financial savings from welfare reforms have been taken from the incomes of women, largely due to the fact that they make up the majority of lone parents and unpaid carers.[17] Women also form a large proportion of the public sector workforce, two-thirds in 2012-13,[18] so are more likely to have been impacted by the two year public sector pay freeze in 2010 and subsequent 1% pay cap that has led to a pay cut in real terms.[14]

Our previous research demonstrated an increase in poor mental health in men but not women following the Great Recession, with no clear evidence for an increase in socioeconomic inequalities.[19]

We aimed for the first time to investigate trends in both gender inequalities and socioeconomic inequalities in poor mental health in the UK following the onset of austerity, and compare these to the immediate aftermath of the 2008 recession.



## METHODS

### Dataset

Following our previous approach, we used the Health Survey for England (HSE; 1991-2014), a multi-stage stratified random sample designed to be nationally and regionally representative, to construct a repeat cross-sectional dataset. Details of the HSE have been published elsewhere.[20] Response levels have fallen over time but plateaued recently, remaining reasonably high at 62% in 2014 compared with 64% in 2007.[21] Weights for non-response were available from 2003. The rationale for choosing this dataset was the lengthy time period over which it has run using standardised methods, allowing consideration of very long-term trends.

### Population

The HSE general population samples were used for all analyses, restricted to those between 25 and 64 years of age to minimise misclassification of employment status among students. Those missing data on age, gender, measure of socioeconomic position (SEP), employment status or outcome were excluded. Sensitivity analysis was performed using the population aged 25-59 years to ensure inclusion of early retirees was not impacting results.

From 1991-2014 there were 128,003 potential participants. 7,774 participants (6.1%) missing outcome data, 109 (0.1%) missing educational attainment, 2964 (2.3%) with foreign or other qualifications which could not be categorised, and 37 (0.03%) missing employment status were excluded, leaving 117,119 participants (91.5%) for inclusion. For analysis using area-level deprivation from 2001 onwards where there were 73,682 potential participants, 5,317 participants (7.2%) missing outcome data, 562 participants (0.7%) missing deprivation score, and 25 (0.03%) missing employment status were excluded, leaving 67,778 participants for inclusion (92.0%).

### Exposure Measurement and Covariates

The SEP exposure measures considered were educational attainment and area-level deprivation. Highest educational attainment was available for all years except 1995 and 1996, coded into four categories: degree-level or equivalent, A-level or equivalent, GCSE or equivalent, and no formal qualifications. A marker of small area-level deprivation based on postcode (Index of Multiple Deprivation [IMD] scored in quintiles) was available from 2001.

Covariates considered were employment status and total household income. Employment status was recorded as self-reported activity within the preceding week, coded in six categories: in

1  
2  
3 employment, unemployed, retired through ill health, retired, looking after home, or in education.  
4 Total household income was available from 1997, coded into quintiles.  
5

6  
7 The UK economy did not enter recession until the last quarter of 2008 (defined by two successive  
8 quarters of negative growth in GDP),[22, 23] and while austerity policies were announced in mid-  
9 2010[14] it is unlikely that health consequences would have manifested within this year. We  
10 therefore defined in advance all years up to and including 2008 'pre-recession', the years 2009 and  
11 2010 the 'recession period' and from 2012 onwards the 'austerity period' (outcome data were  
12 unavailable for 2011).  
13  
14  
15

### 16 **Outcome Measurement**

17  
18 Poor mental health was assessed using the General Health Questionnaire-12 (GHQ-12), a validated  
19 screening tool for common mental health problems used widely in epidemiological research, which  
20 scores self-reported symptoms of anxiety and depression.[24] The GHQ-12 formed part of the core  
21 questions in each sweep of the HSE except 1996 and 2007, though from 2010 has only been included  
22 every second year. A GHQ-12 score of four or greater indicates a strong likelihood of a common  
23 mental disorder,[25] and therefore defined a 'case'.  
24  
25  
26  
27

### 28 **Statistical Analysis**

29  
30 Directly age-standardised prevalence estimates of GHQ caseness were calculated for each year,  
31 stratified by gender and both measures of SEP. The 2013 WHO European Standard Population was  
32 used for all direct standardisations, and estimates were displayed graphically.  
33  
34  
35

36  
37 To quantify any potential impact of the recession and austerity on mental health by gender,  
38 multivariable logistic regression modelling was performed. First, data from each year were regressed  
39 separately to determine long-term trends in the difference between male and female caseness,  
40 adjusting for age, education, and employment status. In a combined dataset of all years, models for  
41 men and women separately were then created using 2008 as the baseline/pre-recession year, and  
42 adjusted for age, SEP, employment status, and total household income. As the main time period of  
43 interest was following the point at which IMD was recorded routinely, we focused on this as the  
44 primary measure of SEP, given marked changes in the distribution of educational attainment over  
45 the study period. In addition to odds ratios, adjusted prevalence differences were derived from the  
46 logistic regression models to give a measure of change on the absolute scale.  
47  
48  
49  
50  
51

52  
53 Long-term trends in socioeconomic inequalities in mental health over time were analysed using the  
54 relative index of inequality (RII), a regression-based index comparing the prevalence of the outcome  
55 between those of the theoretically lowest and highest SEP, thus giving a relative measure that could  
56  
57  
58  
59  
60

1  
2  
3 be used to draw comparisons irrespective of changes in group composition over time.[26] Analysis  
4 was performed using both SEP measures. Participants were ranked according to the chosen measure  
5 of SEP within the datasets for each individual year, with tied participants receiving the same rank;  
6 these ranks were then divided by the sample size, scaling the rank value to between 0 and 1 with a  
7 mean of 0.5.[27] Poisson regression was used to generate prevalence risk ratios with 95%  
8 confidence intervals,[28] comparing the most deprived with the least deprived group, which were  
9 then plotted to view trends. All models were adjusted for age and sex.  
10  
11  
12  
13

#### 14 **Patient and Public Involvement**

15  
16 There was no patient or public involvement in the design of this study.  
17  
18  
19  
20  
21  
22  
23  
24  
25  
26  
27  
28  
29  
30  
31  
32  
33  
34  
35  
36  
37  
38  
39  
40  
41  
42  
43  
44  
45  
46  
47  
48  
49  
50  
51  
52  
53  
54  
55  
56  
57  
58  
59  
60

## RESULTS

Characteristics of included individuals are displayed in supplementary appendix 1. Over the study period there was a marked increase in women reporting degree-level education, and for both genders the number reporting no formal qualifications fell. During the main time period of interest (2005 onwards) there was little change in gender distribution.

### Mental Health Trends by Gender

The prevalence of GHQ caseness was consistently higher in women than men over the study period (Figure 1). There were three clear points of deviation from secular trends for both genders: the late 1990s, early 2000s, and 2008 onwards. These deviations coincide with periods of macroeconomic disruption. During the former two time periods the UK economy declined but avoided entering recession;<sup>[22, 23]</sup> the increases in prevalence which coincide with these were patterned similarly between genders. Conversely, in 2009 following the Great Recession there was a marked increase in age-standardised GHQ caseness in men and a more modest increase in women, with only a slight improvement for men in 2010. During the austerity period this patterning altered. While in 2012 male GHQ caseness continued to decrease, female GHQ caseness increased to 18.7% (95% CI 17.2-20.2), its highest observed value since 2002.

[INSERT FIGURE 1]

Between 1991 and 2004 the difference between male and female prevalence, adjusted for age, education and employment status, narrowed from 7.9% (95% CI 4.3-11.4) to 3.3% (95% CI 1.1-5.6). Despite a marked further narrowing of this gender gap in the recession period with a fall to 1.1% (95% CI -1.8-4.0) in 2009 (secondary to the more marked increase in GHQ caseness for men), by 2012 it had sharply widened again to 6.8% (95% CI 4.6-8.9), the largest adjusted difference between male and female prevalence since 1994. Values for all years are provided in supplementary appendices 2 and 3.

Table 1 presents logistic regression models from the period of interest for each gender, with tables for the whole time period 2001-2014 available in supplementary appendix 4.

Table 1: Multiple logistic regression models (with odds ratios and % point difference) for participants of each gender, 2005-2014 (2008 as pre-recession reference year)

| Regression models for men (n=24,930)   |                                |         |              |              |                                            |         |              |              |                                                    |         |              |              |
|----------------------------------------|--------------------------------|---------|--------------|--------------|--------------------------------------------|---------|--------------|--------------|----------------------------------------------------|---------|--------------|--------------|
|                                        | Model 1: Adjusted for age, IMD |         |              |              | Model 2: Adjusted for age, IMD, employment |         |              |              | Model 3: Adjusted for age, IMD, employment, income |         |              |              |
| Year                                   | Odds Ratio                     | p-value | Lower 95% CI | Upper 95% CI | Odds Ratio                                 | p-value | Lower 95% CI | Upper 95% CI | Odds Ratio                                         | p-value | Lower 95% CI | Upper 95% CI |
| 2005                                   | 1.03                           | 0.722   | 0.86         | 1.24         | 0.92                                       | 0.400   | 0.76         | 1.12         | 0.90                                               | 0.303   | 0.74         | 1.10         |
| 2006                                   | 1.06                           | 0.476   | 0.91         | 1.24         | 1.04                                       | 0.676   | 0.88         | 1.22         | 1.03                                               | 0.765   | 0.87         | 1.21         |
| 2008                                   | 1.00                           | -       | -            | -            | 1.00                                       | -       | -            | -            | 1.00                                               | -       | -            | -            |
| 2009                                   | 1.64                           | <0.001  | 1.34         | 2.00         | 1.55                                       | <0.001  | 1.25         | 1.93         | 1.53                                               | <0.001  | 1.24         | 1.91         |
| 2010                                   | 1.28                           | 0.009   | 1.06         | 1.53         | 1.26                                       | 0.021   | 1.04         | 1.52         | 1.26                                               | 0.018   | 1.04         | 1.53         |
| 2012                                   | 1.15                           | 0.147   | 0.95         | 1.38         | 1.10                                       | 0.340   | 0.91         | 1.33         | 1.10                                               | 0.342   | 0.91         | 1.33         |
| 2014                                   | 1.13                           | 0.215   | 0.93         | 1.37         | 1.17                                       | 0.126   | 0.96         | 1.43         | 1.18                                               | 0.108   | 0.96         | 1.44         |
| Year                                   | % Diff.                        | p-value | Lower 95% CI | Upper 95% CI | % Diff.                                    | p-value | Lower 95% CI | Upper 95% CI | % Diff.                                            | p-value | Lower 95% CI | Upper 95% CI |
| 2005                                   | 0.34                           | 0.723   | -1.53        | 2.20         | -0.75                                      | 0.396   | -2.50        | 0.99         | -0.93                                              | 0.298   | -2.67        | 0.82         |
| 2006                                   | 0.58                           | 0.477   | -1.01        | 2.17         | 0.33                                       | 0.676   | -1.21        | 1.86         | 0.23                                               | 0.765   | -1.30        | 1.77         |
| 2008                                   | 0.00                           | -       | -            | -            | 0.00                                       | -       | -            | -            | 0.00                                               | -       | -            | -            |
| 2009                                   | 5.88                           | <0.001  | 3.24         | 8.52         | 4.72                                       | <0.001  | 2.20         | 7.23         | 4.62                                               | <0.001  | 2.11         | 7.12         |
| 2010                                   | 2.67                           | 0.012   | 0.60         | 4.73         | 2.29                                       | 0.024   | 0.30         | 4.28         | 2.37                                               | 0.021   | 0.36         | 4.38         |
| 2012                                   | 1.44                           | 0.154   | -0.54        | 3.42         | 0.89                                       | 0.344   | -0.95        | 2.73         | 0.89                                               | 0.346   | -0.96        | 2.74         |
| 2014                                   | 1.26                           | 0.223   | -0.77        | 3.30         | 1.53                                       | 0.134   | -0.47        | 3.52         | 1.63                                               | 0.115   | -0.40        | 3.65         |
| Regression models for women (n=31,413) |                                |         |              |              |                                            |         |              |              |                                                    |         |              |              |
|                                        | Model 1: Adjusted for age, IMD |         |              |              | Model 2: Adjusted for age, IMD, employment |         |              |              | Model 3: Adjusted for age, IMD, employment, income |         |              |              |
| Year                                   | Odds Ratio                     | p-value | Lower 95% CI | Upper 95% CI | Odds Ratio                                 | p-value | Lower 95% CI | Upper 95% CI | Odds Ratio                                         | p-value | Lower 95% CI | Upper 95% CI |
| 2005                                   | 1.06                           | 0.426   | 0.92         | 1.22         | 1.05                                       | 0.531   | 0.91         | 1.21         | 1.02                                               | 0.762   | 0.88         | 1.18         |
| 2006                                   | 0.91                           | 0.153   | 0.81         | 1.03         | 0.90                                       | 0.102   | 0.80         | 1.02         | 0.89                                               | 0.077   | 0.79         | 1.01         |
| 2008                                   | 1.00                           | -       | -            | -            | 1.00                                       | -       | -            | -            | 1.00                                               | -       | -            | -            |
| 2009                                   | 1.06                           | 0.537   | 0.89         | 1.25         | 1.07                                       | 0.429   | 0.90         | 1.28         | 1.07                                               | 0.431   | 0.90         | 1.28         |
| 2010                                   | 1.00                           | 0.980   | 0.86         | 1.15         | 0.99                                       | 0.849   | 0.85         | 1.14         | 0.99                                               | 0.922   | 0.86         | 1.15         |
| 2012                                   | 1.24                           | 0.003   | 1.08         | 1.42         | 1.24                                       | 0.003   | 1.07         | 1.43         | 1.25                                               | 0.002   | 1.09         | 1.45         |
| 2014                                   | 1.10                           | 0.208   | 0.95         | 1.27         | 1.11                                       | 0.171   | 0.96         | 1.28         | 1.12                                               | 0.138   | 0.97         | 1.29         |
| Year                                   | % Diff.                        | p-value | Lower 95% CI | Upper 95% CI | % Diff.                                    | p-value | Lower 95% CI | Upper 95% CI | % Diff.                                            | p-value | Lower 95% CI | Upper 95% CI |
| 2005                                   | 0.79                           | 0.429   | -1.16        | 2.74         | 0.60                                       | 0.533   | -1.29        | 2.50         | 0.29                                               | 0.762   | -1.60        | 2.18         |
| 2006                                   | -1.16                          | 0.153   | -2.74        | 0.43         | -1.28                                      | 0.102   | -2.82        | 0.25         | -1.39                                              | 0.077   | -2.94        | 0.15         |
| 2008                                   | 0.00                           | -       | -            | -            | 0.00                                       | -       | -            | -            | 0.00                                               | -       | -            | -            |
| 2009                                   | 0.73                           | 0.541   | -1.61        | 3.07         | 0.93                                       | 0.435   | -1.40        | 3.25         | 0.93                                               | 0.436   | -1.41        | 3.27         |
| 2010                                   | -0.02                          | 0.98    | -1.96        | 1.91         | -0.18                                      | 0.848   | -2.07        | 1.70         | -0.10                                              | 0.922   | -2.00        | 1.81         |

|      |      |       |       |      |      |       |       |      |      |       |       |      |
|------|------|-------|-------|------|------|-------|-------|------|------|-------|-------|------|
| 2012 | 3.04 | 0.004 | 0.99  | 5.08 | 2.90 | 0.004 | 0.93  | 4.88 | 3.11 | 0.002 | 1.11  | 5.11 |
| 2014 | 1.27 | 0.213 | -0.73 | 3.28 | 1.34 | 0.176 | -0.60 | 3.29 | 1.47 | 0.142 | -0.49 | 3.44 |

GHQ caseness in men was higher in both 2009 and 2010 after adjusting for age and IMD, with prevalence predicted to have increased in the population by 5.9% (95% CI 3.2-8.5,  $p<0.001$ ) percentage points from 2008 to 2009. This increase remained largely unchanged (4.6%, 95% CI 2.1-7.1,  $p<0.001$ ) after adjustment for the potential mediating effect of employment status and household income. For men, there was no evidence of significant worsening of population mental health in either 2012 or 2014 when compared with 2008 in any model.

For women, after adjusting for age and IMD there was no evidence of an increase in GHQ caseness during the recession period. However, in 2012 the predicted increase in the population compared with 2008 was 3.0% (95% CI 1.0-5.1,  $p=0.004$ ), and after further adjustment for employment status and household income this remained largely unchanged at 3.1% (95% CI 1.1-5.1,  $p=0.002$ ). There was a smaller adjusted increase in 2014 compared with 2008 of 1.5% (95% CI -0.5-3.4,  $p=0.142$ ).

#### Mental Health Trends by Socioeconomic Position

[INSERT FIGURE 2]

There was a clear socioeconomic gradient in GHQ caseness throughout the study period (Figure 2). The absolute difference between the most and least deprived quintiles was amongst the highest recorded during the austerity period (13.5% in 2012, 11.2% in 2014) compared with smaller differences during the recession period (9.2% in 2009, 8.6% in 2010). All values are provided in supplementary appendix 5.

[INSERT FIGURE 3]

Stratification by highest educational attainment produced similar trends during the recession and austerity periods (Figure 3), with the exception of those with no formal qualifications. This group experienced worsening of GHQ caseness throughout the study period, rising from 15.7% (95% CI 12.8-18.5) in 1991 to 23.7% (95% CI 20.0-27.4) by 2014 without seeing the recovery experienced by other groups during the austerity period. All values are provided in supplementary appendix 6. To explore the marked worsening for the least educated during the austerity period, further stratification by gender was performed for the period 2012-2014: the increase in this group was predominantly among men, with age-standardised prevalence rising from 16.0% (95% CI 11.5-20.5) in 2012 to 22.8% (95% CI 17.3-28.3) in 2014, while for women the increase was smaller from 22.7% (95% CI 17.9-27.5) in 2012 to 24.7% (95% CI 19.8-29.5) in 2014.

1  
2  
3 [INSERT FIGURE 4]

4 Relative socioeconomic inequalities in GHQ caseness have been consistently observed since 1999  
5 (Figure 4). Inequalities in GHQ caseness have increased from the late 1990s to the immediate pre-  
6 recession period, with inequalities generally larger by area-level deprivation. During the recession  
7 period there was a slight reduction in socioeconomic inequalities, with RII by education falling from  
8 1.8 (95% CI 1.5-2.2,  $p < 0.001$ ) in 2008 to 1.6 (95% CI 1.2-2.1,  $p = 0.001$ ) in 2010 and by IMD quintile  
9 from 2.3 (95% CI 1.9-2.8,  $p < 0.001$ ) in 2008 to 1.9 (95% CI 1.4-2.4,  $p < 0.001$ ) in 2010. However, these  
10 trends reversed during the austerity period, and by 2014 both RIIs had returned to pre-recession  
11 levels. All values are provided in supplementary appendix 7.

12  
13  
14  
15  
16  
17  
18 For all analyses, sensitivity analysis excluding those aged 60-64 years did not affect trends.  
19  
20  
21  
22  
23  
24  
25  
26  
27  
28  
29  
30  
31  
32  
33  
34  
35  
36  
37  
38  
39  
40  
41  
42  
43  
44  
45  
46  
47  
48  
49  
50  
51  
52  
53  
54  
55  
56  
57  
58  
59  
60

## DISCUSSION

In this large repeat cross-sectional study of a representative sample of the English population, we found mental health worsened for women following the onset of austerity policies, while men saw a recovery to pre-recession levels. As a result of the changes, gender inequalities in poor mental health widened during the austerity period, reversing the trend from 1991-2004 of gradual improvement. We also found that socioeconomic inequalities in poor mental health narrowed in the immediate years following the 2008 recession but widened during the austerity period. While it is not possible to draw definitive causal conclusions from this study, our findings are useful in examining changes in secular trends and their chronological association with macroeconomic events and policies.

There is conflicting evidence in existing literature around whether mental health inequalities by gender or socioeconomic position have widened in the UK since the recession. Our previous work suggested males saw the sharpest worsening of mental health, and found no evidence of widening socioeconomic inequalities when existing trends were taken into account.[19] However, this was prior to the onset of austerity. More recent evidence showed a more marked worsening of mental health for women in 2014 compared with 2007, but did not take into account intervening years.[29] A large study of pan-European data including the UK found no systematic influence of the recession on socioeconomic inequalities in depression up to 2014,[30] but did not differentiate between the immediate recessionary period and the period following any economic policy response. Work by Barr et al suggested that from 2009 to 2013 there may have been a widening of socioeconomic inequalities in mental health in the UK.[31] However, this used self-reported diagnoses and only two broad categories of socioeconomic group. Our study adds clarity to both areas.

There is no consensus around what factors are responsible for the gender gap in poor mental health. There is little evidence it results from purely genetic or biological differences, with sociocultural roles, adverse life events and learned psychological attributes thought more likely contributing factors.[32] Our findings of a reversal in trend direction echo those of others who have begun to raise concerns about the mental health of UK women in recent years, particularly young women.[29, 33] The timing of this reversal in relation to austerity reforms, and the differential gender patterning of austerity,[17] could indicate that the change for women may be secondary to the policy response rather than the economic crisis itself – particularly, as evidence emerges of likely adverse impacts of specific policy reforms affecting women, such as restrictions to income support being linked to deteriorations in mental health amongst lone parents.[34]



1  
2  
3 The finding of a reversal in trend towards widening socioeconomic inequalities following the onset  
4 of austerity adds to the evidence base arguing such measures may mediate the link between  
5 macroeconomic change and mental health.[2, 10] Ecological studies using pan-European data  
6 suggest the direct effect of unemployment on suicide rates was greater in countries with lower  
7 social spending,[35] and conversely, higher government spending on unemployment support may  
8 mitigate adverse impacts on self-rated health.[36] On a relative scale the widening of socioeconomic  
9 inequalities post-austerity is small in the context of long-term trends, particularly by highest  
10 qualification (Figure 4), and the degree and timing of short-term trends around the recession and  
11 austerity period also differ between measures of SEP, possibly explaining the current lack of  
12 consensus in the literature.[30, 31]

13  
14  
15  
16  
17  
18  
19 The marked divergence for those with no formal qualifications by 2014 may support the hypothesis  
20 that those in low-skilled jobs (who are known to experience poorer health outcomes[37]) may be  
21 worst affected by reduced in-work financial support or worsening job conditions such as increased  
22 insecure work.[38] Their divergence may also be partly attributable to changes in demographics over  
23 the study period, with the group achieving no qualifications becoming smaller and more  
24 homogenous over time. Regardless, they are notable outliers in 2014, identifying this group as  
25 particularly high risk for poor mental health.  
26  
27  
28  
29

### 30 31 **Strengths and Limitations**

32  
33 Our study has a number of important strengths. The HSE is a large, nationally and regionally  
34 representative survey which has used standard protocols over a long period of time. The GHQ-12 is a  
35 validated and commonly used measure, and outcome data were available for most years allowing  
36 detailed consideration of trends. While there is some debate about the most appropriate threshold  
37 to use to determine caseness in different populations,[39] we chose a cut-off value that has been  
38 used previously with this population[19, 40] and which indicates a strong likelihood of common  
39 mental disorder,[25] increasing specificity and reducing the likelihood of false positive cases. The use  
40 and comparison of two measures of SEP is useful in demonstrating consistency of trends between  
41 SEP and poor mental health.  
42  
43  
44  
45  
46

47  
48 Our study also has some limitations which must be considered. The use of cross-sectional rather  
49 than individual longitudinal data mean the ability to derive causal inferences is limited; however, it  
50 does overcome attrition bias in cohort studies which can commonly lead to an underestimation of  
51 inequalities.[41] As data were not collected on whether individuals were subject to specific austerity  
52 measures, this could not be included as an explanatory variable. Household income was felt to be a  
53 reasonable proxy given that most reforms were associated with financial loss.[16] It is acknowledged  
54  
55  
56  
57  
58  
59  
60

1  
2  
3 that the impact of an economic crisis or subsequent policies is not necessarily immediate and is likely  
4 to be mediated by related factors such as long-term unemployment. It is therefore possible that  
5 trends in GHQ caseness may have been influenced by other factors apart from austerity, including  
6 observed trends reflecting the longer term impacts of earlier macro-economic exposures. Finally, it  
7 is unfortunate that outcome data were not available from 2007, 2011, 2013 or 2015, as this would  
8 have strengthened the evidence for the assessment of trends.  
9  
10

11  
12 Further research using longitudinal data would add strength to any argument for causality, as would  
13 replication using alternative outcome measures, such as antidepressant prescriptions. Distinguishing  
14 between the impact of different components of austerity measures, e.g. public sector employment  
15 terms, welfare reforms, or access to community services, could add further nuance to our reporting  
16 of their potential combined impact and overcome this identified limitation. Furthermore, increasing  
17 devolution provides the opportunity to study differences in policy approaches within the UK.[42]  
18 Cross-national comparisons would also be useful in determining whether observed trends are  
19 replicated elsewhere, and whether impacts are dependent on levels of austerity, and natural  
20 experiment approaches could strengthen causal inference.[43] Finally, it is clearly important to see  
21 whether the observed trajectories in mental health inequalities have continued following 2014,  
22 particularly given that more severe welfare reforms were initiated in 2015.[16]  
23  
24  
25  
26  
27  
28  
29

### 30 31 **Conclusions**

32  
33 This study adds to what the European Psychiatric Association in 2016 described as an emerging  
34 'broad consensus about the deleterious consequences of economic crises on mental health'.[44] The  
35 gender gap in mental health, which had been improving prior to the recession, appears to be sharply  
36 widening again following the onset of austerity policies which have largely focused on women. Those  
37 in the most deprived groups have been shown to be at potentially heightened risk of poor mental  
38 health following the onset of austerity, with the least educated at highest risk.  
39  
40  
41  
42

43 These findings are alarming, particularly given that since the time period studied there have been  
44 further cuts to mental health provision which mean the issue may now be worse.[45] Labonté and  
45 Stuckler argue in strong terms that, based on current evidence of economic, health and social harms,  
46 austerity policies threaten to 'imperil the world's population' without radical reform.[2]  
47 Policymakers in the UK, and those considering embarking on or continuing austerity measures  
48 elsewhere in the world, should be aware that these may have adverse health impacts for their  
49 populations.  
50  
51  
52  
53  
54  
55  
56  
57  
58  
59  
60

## DECLARATIONS

### Acknowledgements

We would like to thank Frank Popham for providing feedback on drafts of the manuscript. We are extremely grateful to the individuals who took part in all cycles of the Health Survey for England, and all those involved in its administration over the years. We would like to acknowledge the assistance of the UK Data Archive for providing access to the data; the Information Centre for health and social care and Department of Health for sponsoring the Health Survey for England; and the Principal Investigators of the Health Survey for England, Natcen Social Research and the Department of Epidemiology and Public Health at the Royal Free and University College Medical School. The responsibility for the analysis presented here lies solely with the authors.

### Competing Interests

The authors declare no conflicts of interest.

### Funding

SVK is funded by a NRS Senior Clinical Fellowship (SCAF/15/02), the Medical Research Council (MC\_UU\_12017/13 & MC\_UU\_12017/15) and Scottish Government Chief Scientist Office (SPHSU13 & SPHSU15). CLN is funded by the Medical Research Council (MR/R024774/1).

### Contributors

RT serves as guarantor for this article. RT and SVK conceived the idea for the study, and RT performed the statistical analysis and wrote the first draft of the article. CN and SVK assisted in research design, interpretation of findings and critical revision of the manuscript.

### Ethics Approval

Ethical approval was not required for this study as it used previously collected data. Ethical approval for each year of the survey was obtained by the Health Survey for England team.

### Data Sharing Statement

No additional data available.

### Figure Legends

Figure 1: Age-standardised General Health Questionnaire caseness in men and women aged 25-64 years, 1991-2014, with 95% confidence intervals; Percentage point difference between male and

1  
2  
3 female GHQ caseness with 95% confidence intervals, adjusted for age, education and employment  
4 status using logistic regression. Dashed lines indicate missing years.  
5

6 Figure 2: Age-sex standardised General Health Questionnaire caseness by Index of Multiple  
7 Deprivation quintile in 25-64 year olds, 2001-2014, with 95% confidence intervals. Dashed lines  
8 indicate missing years.  
9

10  
11  
12 Figure 3: Age-sex standardised General Health Questionnaire caseness by education level in 25-64  
13 year olds, 1991-2014, with 95% confidence intervals. Dashed lines indicate missing years.  
14

15  
16 Figure 4: Relative index of inequality in General Health Questionnaire caseness in 25-64 year olds by  
17 education level and Index of Multiple Deprivation quintile, 1991-2014, with 95% confidence  
18 intervals. Dashed lines indicate missing years.  
19  
20  
21  
22  
23  
24  
25  
26  
27  
28  
29  
30  
31  
32  
33  
34  
35  
36  
37  
38  
39  
40  
41  
42  
43  
44  
45  
46  
47  
48  
49  
50  
51  
52  
53  
54  
55  
56  
57  
58  
59  
60

## REFERENCES

1. Stuckler D, Basu S, Suhrcke M, et al. The public health effect of economic crises and alternative policy responses in Europe: an empirical analysis. *Lancet* 2009;374(9686):315-23. doi: 10.1016/S0140-6736(09)61124-7
2. Labonte R, Stuckler D. The rise of neoliberalism: how bad economics imperils health and what to do about it. *J Epidemiol Community Health* 2016;70(3):312-18. doi: 10.1136/jech-2015-206295
3. Frasquilho D, Matos MG, Salonna F, et al. Mental health outcomes in times of economic recession: a systematic literature review. *BMC Public Health* 2016;16:115. doi: 10.1186/s12889-016-2720-y [published Online First: 2016/02/06]
4. Katikireddi SV, Niedzwiedz CL, Popham F. Employment status and income as potential mediators of educational inequalities in population mental health. *Eur J Public Health* 2016;26(5):814-16. doi: 10.1093/eurpub/ckw126
5. Tapia Granados JA, Ionides EL. Population health and the economy: Mortality and the Great Recession in Europe. *Health Econ* 2017 doi: 10.1002/hec.3495 [published Online First: 2017/03/28]
6. Toffolutti V, Suhrcke M. Assessing the short term health impact of the Great Recession in the European Union: a cross-country panel analysis. *Prev Med* 2014;64:54-62. doi: 10.1016/j.ypmed.2014.03.028 [published Online First: 2014/04/11]
7. Karanikolos M, Heino P, McKee M, et al. Effects of the Global Financial Crisis on Health in High-Income Oecd Countries: A Narrative Review. *Int J Health Serv* 2016;46(2):208-40. doi: 10.1177/0020731416637160
8. Stuckler D, Basu S. *The Body Economic: Eight experiments in economic recovery, from Iceland to Greece*. London: Penguin 2013.
9. Reeves A, McKee M, Stuckler D. Economic suicides in the Great Recession in Europe and North America. *Br J Psychiatry* 2014;205(3):246-7. doi: 10.1192/bjp.bp.114.144766 [published Online First: 2014/06/14]
10. Karanikolos M, Mladovsky P, Cylus J, et al. Financial crisis, austerity, and health in Europe. *Lancet* 2013;381(9874):1323-31. doi: 10.1016/s0140-6736(13)60102-6 [published Online First: 2013/04/02]
11. De Vogli R. The financial crisis, health and health inequities in Europe: the need for regulations, redistribution and social protection. *Int J Equity Health* 2014;13:58. doi: 10.1186/s12939-014-0058-6 [published Online First: 2014/07/26]

12. Loopstra R, McKee M, Katikireddi SV, et al. Austerity and old-age mortality in England: a longitudinal cross-local area analysis, 2007-2013. *J R Soc Med* 2016;109(3):109-16. doi: 10.1177/0141076816632215
13. Ruckert A, Labonte R. The global financial crisis and health equity: early experiences from Canada. *Global Health* 2014;10:2. doi: 10.1186/1744-8603-10-2 [published Online First: 2014/01/08]
14. Reeves A, Basu S, McKee M, et al. Austere or not? UK coalition government budgets and health inequalities. *J R Soc Med* 2013;106(11):432-6. doi: 10.1177/0141076813501101
15. Engender, Scottish Refugee Council, Scottish Women's Aid, et al. A Widening Gap: Women and Welfare Reform. Scotland: Engender, 2015.
16. Beatty C, Fothergill S. The uneven impact of welfare reform: The financial losses to places and people. Sheffield: Centre for Regional Economic and Social Research, Sheffield Hallam University, 2016.
17. Ariss A, Firmin C, Meacher B, et al. Where's the Benefit? An Independent Inquiry into Women and Jobseeker's Allowance. In: Society TF, ed. London: The Fawcett Society, 2015.
18. Cribb J, Disney R, Sibieta L. The public sector workforce: past, present and future. London, 2014.
19. Katikireddi SV, Niedzwiedz CL, Popham F. Trends in population mental health before and after the 2008 recession: a repeat cross-sectional analysis of the 1991-2010 Health Surveys of England. *BMJ Open* 2012;2(5) doi: 10.1136/bmjopen-2012-001790
20. Mindell J, Biddulph JP, Hirani V, et al. Cohort profile: the health survey for England. *Int J Epidemiol* 2012;41(6):1585-93. doi: 10.1093/ije/dyr199 [published Online First: 2012/01/19]
21. NatCen Social Research, University College London, Department of Epidemiology and Public Health. Health Survey for England: UK Data Service, 1991-2014.
22. Macrotrends LLC. FTSE 100 Index - 32 Year Historical Chart [Online]: Macrotrends LLC; [updated June 2017; cited 23rd June 2017]. Available from: <http://www.macrotrends.net/2598/ftse-100-index-historical-chart-data>.
23. The Office for National Statistics. Times Series: Gross Domestic Product: Quarter on Quarter Growth: CVM SA%: ONS; [updated May 2017; cited 30th June 2017]. Available from: <https://www.ons.gov.uk/economy/grossdomesticproductgdp/timeseries/ihyq/pn2>.
24. Goldberg DP, Gater R, Sartorius N, et al. The validity of two versions of the GHQ in the WHO study of mental illness in general health care. *Psychol Med* 1997;27(1):191-7. [published Online First: 1997/01/01]

- 1  
2  
3  
4 25. Goldberg DP, Williams, P. A user's guide to the General Health Questionnaire. Windsor: NFER-  
5 Nelson 1988.  
6  
7  
8 26. Sergeant JC, Firth D. Relative index of inequality: definition, estimation, and inference.  
9 *Biostatistics* 2006;7(2):213-24. doi: 10.1093/biostatistics/kxj002 [published Online First:  
10 2005/09/30]  
11  
12 27. Batty GD, Der G, Macintyre S, et al. Does IQ explain socioeconomic inequalities in health?  
13 Evidence from a population based cohort study in the west of Scotland. *The BMJ*  
14 2006;332(7541):580-4. doi: 10.1136/bmj.38723.660637.AE [published Online First:  
15 2006/02/03]  
16  
17  
18 28. Mood C. Logistic Regression: Why We Cannot Do What We Think We Can Do, and What We Can  
19 Do About It. *Eur Sociol Rev* 2010;26(1):67-82.  
20  
21  
22 29. McManus S, Bebbington P, Jenkins R, et al. Mental health and wellbeing in England: Adult  
23 Psychiatric Morbidity Survey 2014. Leeds: NHS Digital 2016.  
24  
25  
26 30. Reibling N, Beckfield J, Huijts T, et al. Depressed during the depression: has the economic crisis  
27 affected mental health inequalities in Europe? Findings from the European Social Survey  
28 (2014) special module on the determinants of health. *Eur J Public Health*  
29 2017;27(suppl\_1):47-54. doi: 10.1093/eurpub/ckw225 [published Online First: 2017/03/30]  
30  
31  
32 31. Barr B, Kinderman P, Whitehead M. Trends in mental health inequalities in England during a  
33 period of recession, austerity and welfare reform 2004 to 2013. *Soc Sci Med* 2015;147:324-  
34 31. doi: 10.1016/j.socscimed.2015.11.009  
35  
36  
37 32. Piccinelli M, Wilkinson G. Gender differences in depression. Critical review. *Br J Psychiatry*  
38 2000;177:486-92. [published Online First: 2000/12/05]  
39  
40  
41 33. Lessof C, Ross A, Brind R, et al. Longitudinal Study of Young People in England cohort 2: health  
42 and wellbeing at wave 2; Research report UK: TNS BMRB, 2016.  
43  
44  
45 34. Katikireddi SV, Molaodi OR, Gibson M, et al. Evaluating the impacts of restrictions to income  
46 support for lone parents on health: A natural experiment study. *The Lancet Public Health [in*  
47 *press]* 2018  
48  
49  
50 35. Baumbach A, Gulis G. Impact of financial crisis on selected health outcomes in Europe. *Eur J*  
51 *Public Health* 2014;24(3):399-403. doi: 10.1093/eurpub/cku042 [published Online First:  
52 2014/04/09]  
53  
54  
55 36. Toge AG. Health Effects of Unemployment in Europe During the Great Recession: The Impact of  
56 Unemployment Generosity. *Int J Health Serv* 2016;46(4):614-41. doi:  
57 10.1177/0020731416664688 [published Online First: 2016/08/27]  
58  
59  
60

- 1  
2  
3  
4 37. Katikireddi SV, Leyland AH, McKee M, et al. Patterns of mortality by occupation in the UK, 1991-  
5 2011: a comparative analysis of linked census and mortality records. *Lancet Public Health*  
6 2017;2(11):e501-e12. doi: 10.1016/S2468-2667(17)30193-7  
7  
8  
9 38. Benach J, Vives A, Amable M, et al. Precarious employment: understanding an emerging social  
10 determinant of health. *Annu Rev Public Health* 2014;35:229-53. doi: 10.1146/annurev-  
11 pubhealth-032013-182500  
12  
13 39. Goldberg DP, Oldehinkel T, Ormel J. Why GHQ threshold varies from one place to another.  
14 *Psychol Med* 1998;28(4):915-21.  
15  
16  
17 40. Maheswaran H, Kupek E, Petrou S. Self-reported health and socio-economic inequalities in  
18 England, 1996-2009: Repeated national cross-sectional study. *Soc Sci Med* 2015;136-  
19 137:135-46. doi: 10.1016/j.socscimed.2015.05.026 [published Online First: 2015/05/26]  
20  
21  
22 41. Howe LD, Tilling K, Galobardes B, et al. Loss to follow-up in cohort studies: bias in estimates of  
23 socioeconomic inequalities. *Epidemiology* 2013;24(1):1-9. doi:  
24 10.1097/EDE.0b013e31827623b1 [published Online First: 2012/12/06]  
25  
26  
27 42. Katikireddi SV, Smith KE, Stuckler D, et al. Devolution of power, revolution in public health? *J*  
28 *Public Health (Oxf)* 2017;39(2):241-47. doi: 10.1093/pubmed/fdw031  
29  
30  
31 43. Craig P, Katikireddi SV, Leyland A, et al. Natural Experiments: An Overview of Methods,  
32 Approaches, and Contributions to Public Health Intervention Research. *Annu Rev Public*  
33 *Health* 2017;38:39-56. doi: 10.1146/annurev-publhealth-031816-044327  
34  
35  
36 44. Martin-Carrasco M, Evans-Lacko S, Dom G, et al. EPA guidance on mental health and economic  
37 crises in Europe. *Eur Arch Psychiatry Clin Neurosci* 2016;266(2):89-124. doi: 10.1007/s00406-  
38 016-0681-x [published Online First: 2016/02/15]  
39  
40  
41 45. British Medical Association. Mental health budgets cut [Online] [updated February 2017; cited  
42 October 2017]. Available from: [https://www.bma.org.uk/news/2017/february/mental-](https://www.bma.org.uk/news/2017/february/mental-health-budgets-cut)  
43 [health-budgets-cut](https://www.bma.org.uk/news/2017/february/mental-health-budgets-cut).  
44  
45  
46  
47  
48  
49  
50  
51  
52  
53  
54  
55  
56  
57  
58  
59  
60



Figure 1: Age-standardised GHQ caseness in men and women aged 25-64 years, 1991-2014

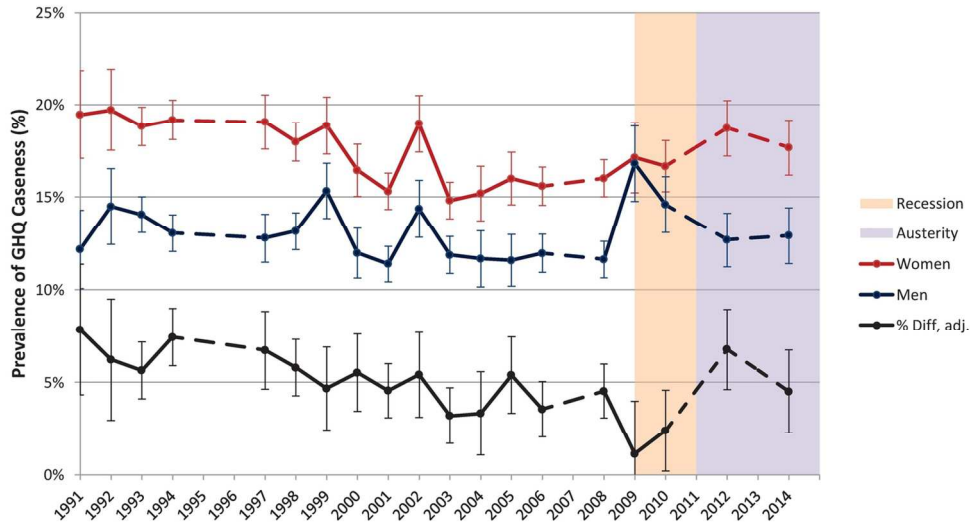

130x80mm (300 x 300 DPI)

**Figure 2: Age-sex standardised GHQ caseness by IMD quintile in 25-64 year olds, 2001-2014**

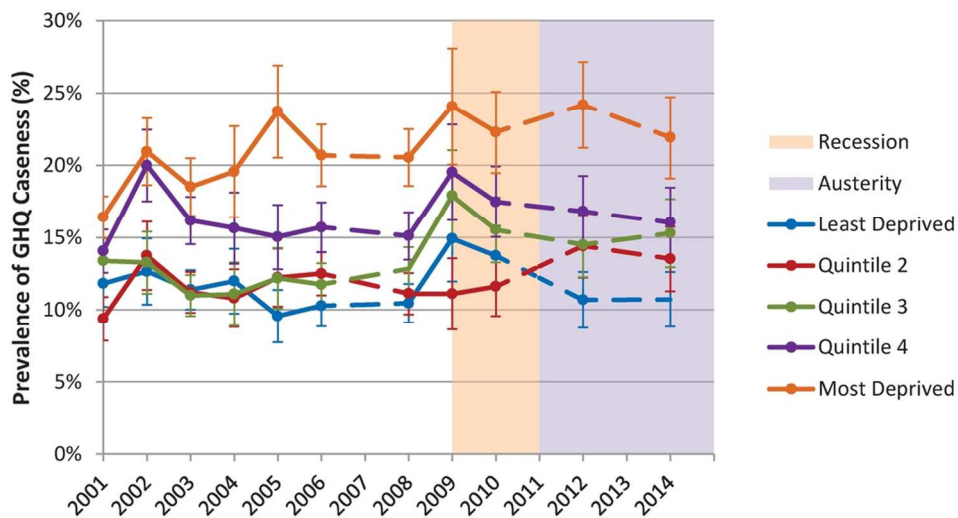

99x63mm (300 x 300 DPI)

1  
2  
3  
4  
5  
6  
7  
8  
9  
10  
11  
12  
13  
14  
15  
16  
17  
18  
19  
20  
21  
22  
23  
24  
25  
26  
27  
28  
29  
30  
31  
32  
33  
34  
35  
36  
37  
38  
39  
40  
41  
42  
43  
44  
45  
46  
47  
48  
49  
50  
51  
52  
53  
54  
55  
56  
57  
58  
59  
60

**Figure 3: Age-sex standardised GHQ caseness by education level in 25-64 year olds, 1991-2014**

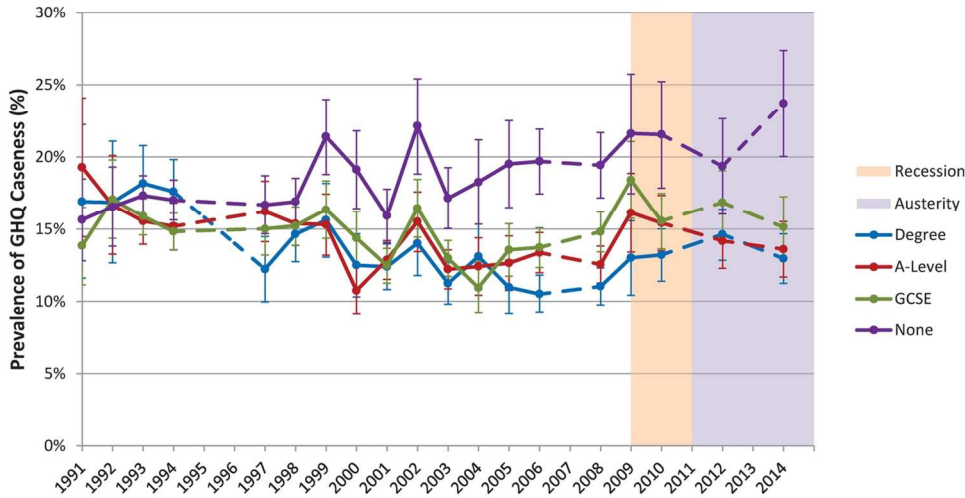

119x71mm (300 x 300 DPI)

Review only

**Figure 4: Relative index of inequality in GHQ caseness in 25-64 year olds, 1991-2014**

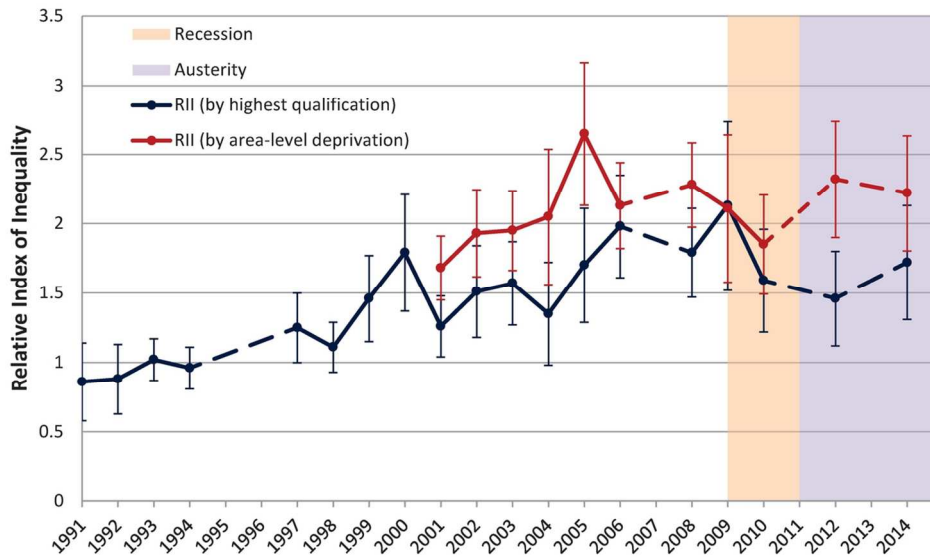

119x79mm (300 x 300 DPI)

1  
2  
3  
4  
5  
6  
7  
8  
9  
10  
11  
12  
13  
14  
15  
16  
17  
18  
19  
20  
21  
22  
23  
24  
25  
26  
27  
28  
29  
30  
31  
32  
33  
34  
35  
36  
37  
38  
39  
40  
41  
42  
43  
44  
45  
46  
47

**Supplementary Appendix**

**Appendix 1: Characteristics of study participants**

| Year |        | Gender (%) | Age Group (%) |       |       |       | Highest Education Level (%) |         |      |      | Sample | Total Sample |
|------|--------|------------|---------------|-------|-------|-------|-----------------------------|---------|------|------|--------|--------------|
|      |        |            | 25-34         | 35-44 | 45-54 | 55-64 | Degree                      | A-Level | GCSE | None |        |              |
| 1991 | Male   | 46.6       | 29.7          | 27.6  | 21.9  | 20.8  | 16.0                        | 20.1    | 32.1 | 31.9 | 942    | 2020         |
|      | Female | 53.4       | 30.0          | 27.2  | 21.7  | 21.2  | 8.1                         | 17.3    | 34.0 | 40.6 | 1078   |              |
| 1992 | Male   | 48.4       | 28.6          | 28.4  | 23.8  | 19.2  | 15.2                        | 26.0    | 32.5 | 26.3 | 1184   | 2500         |
|      | Female | 51.6       | 29.8          | 28.4  | 21.7  | 20.1  | 8.7                         | 18.5    | 37.9 | 34.9 | 1316   |              |
| 1993 | Male   | 47.6       | 29.2          | 26.1  | 24.9  | 19.8  | 16.4                        | 25.4    | 30.1 | 28.2 | 5030   | 10,574       |
|      | Female | 52.4       | 30.2          | 27.0  | 23.8  | 19.0  | 9.6                         | 18.2    | 35.9 | 36.2 | 5544   |              |
| 1994 | Male   | 46.7       | 29.5          | 27.3  | 23.0  | 20.2  | 15.9                        | 26.5    | 30.0 | 27.5 | 4704   | 10,065       |
|      | Female | 53.3       | 31.0          | 27.2  | 23.1  | 18.8  | 10.4                        | 18.0    | 37.9 | 33.7 | 5361   |              |
| 1997 | Male   | 47.2       | 27.7          | 27.4  | 25.5  | 19.4  | 19.2                        | 28.7    | 28.3 | 23.8 | 2559   | 5419         |
|      | Female | 52.8       | 30.6          | 27.2  | 24.5  | 17.7  | 14.0                        | 21.3    | 33.7 | 31.0 | 2860   |              |
| 1998 | Male   | 46.6       | 27.7          | 26.9  | 25.8  | 19.6  | 19.5                        | 28.0    | 29.5 | 23.1 | 4582   | 9836         |
|      | Female | 53.4       | 29.0          | 28.0  | 24.7  | 18.3  | 14.3                        | 20.6    | 36.0 | 29.2 | 5254   |              |
| 1999 | Male   | 47.0       | 25.4          | 28.1  | 25.4  | 21.0  | 21.0                        | 28.5    | 27.5 | 23.0 | 2257   | 4800         |
|      | Female | 53.0       | 27.4          | 29.9  | 25.7  | 17.0  | 15.5                        | 21.6    | 34.4 | 28.6 | 2543   |              |
| 2000 | Male   | 45.8       | 25.9          | 29.7  | 23.4  | 21.0  | 21.7                        | 30.3    | 27.0 | 21.0 | 2311   | 5044         |
|      | Female | 54.2       | 27.6          | 30.5  | 23.3  | 18.5  | 16.5                        | 25.0    | 34.1 | 24.4 | 2733   |              |
| 2001 | Male   | 45.6       | 24.2          | 28.3  | 25.6  | 21.9  | 22.7                        | 29.2    | 29.4 | 18.7 | 4360   | 9553         |
|      | Female | 54.4       | 25.6          | 30.7  | 25.0  | 18.7  | 17.2                        | 23.6    | 35.3 | 23.9 | 5193   |              |
| 2002 | Male   | 43.4       | 23.0          | 31.5  | 23.8  | 21.7  | 23.1                        | 31.6    | 28.2 | 17.2 | 2016   | 4649         |
|      | Female | 56.6       | 27.8          | 32.1  | 22.0  | 18.2  | 19.4                        | 25.1    | 36.2 | 19.3 | 2633   |              |
| 2003 | Male   | 45.5       | 22.6          | 28.6  | 24.4  | 24.3  | 23.6                        | 28.0    | 29.7 | 18.7 | 4117   | 9058         |
|      | Female | 54.6       | 23.9          | 30.6  | 23.3  | 22.1  | 20.4                        | 24.0    | 34.8 | 20.8 | 4941   |              |

1  
2  
3  
4  
5  
6  
7  
8  
9  
10  
11  
12  
13  
14  
15  
16  
17  
18  
19  
20  
21  
22  
23  
24  
25  
26  
27  
28  
29  
30  
31  
32  
33  
34  
35  
36  
37  
38  
39  
40  
41  
42  
43  
44  
45  
46  
47

|             |        |      |      |      |      |      |      |      |      |      |      |             |
|-------------|--------|------|------|------|------|------|------|------|------|------|------|-------------|
| <b>2004</b> | Male   | 43.4 | 23.2 | 27.7 | 22.8 | 26.3 | 25.4 | 27.7 | 27.1 | 19.9 | 1782 |             |
|             | Female | 56.6 | 21.8 | 30.3 | 24.3 | 23.5 | 21.1 | 24.3 | 31.9 | 22.8 | 2327 | <b>4109</b> |
| <b>2005</b> | Male   | 44.8 | 22.0 | 25.0 | 26.9 | 26.0 | 25.5 | 29.0 | 26.7 | 18.8 | 2076 |             |
|             | Female | 55.2 | 22.9 | 27.9 | 26.1 | 23.2 | 22.1 | 23.4 | 32.6 | 21.9 | 2555 | <b>4631</b> |
| <b>2006</b> | Male   | 44.8 | 19.9 | 28.2 | 25.0 | 26.9 | 27.2 | 29.9 | 25.6 | 17.3 | 3896 |             |
|             | Female | 55.2 | 22.2 | 29.2 | 24.7 | 23.8 | 24.2 | 24.3 | 32.1 | 19.4 | 4795 | <b>8691</b> |
| <b>2008</b> | Male   | 44.8 | 21.1 | 27.2 | 24.8 | 26.9 | 27.2 | 30.1 | 25.9 | 16.8 | 4165 |             |
|             | Female | 55.2 | 22.7 | 27.9 | 25.4 | 24.1 | 24.5 | 26.3 | 30.9 | 18.3 | 5135 | <b>9300</b> |
| <b>2009</b> | Male   | 45.6 | 20.7 | 27.8 | 25.9 | 25.7 | 27.4 | 26.8 | 29.3 | 16.5 | 1278 |             |
|             | Female | 54.5 | 22.6 | 29.7 | 24.2 | 23.4 | 25.9 | 24.4 | 32.7 | 17.2 | 1528 | <b>2806</b> |
| <b>2010</b> | Male   | 43.5 | 20.3 | 26.1 | 26.7 | 26.8 | 29.6 | 30.2 | 26.6 | 13.6 | 2123 |             |
|             | Female | 56.5 | 22.1 | 26.8 | 28.2 | 22.9 | 27.5 | 26.6 | 32.0 | 13.9 | 2759 | <b>4882</b> |
| <b>2012</b> | Male   | 43.6 | 19.8 | 26.1 | 26.8 | 27.4 | 32.2 | 29.8 | 24.3 | 13.7 | 2025 |             |
|             | Female | 56.5 | 22.9 | 26.1 | 28.2 | 22.9 | 32.3 | 27.1 | 26.5 | 14.1 | 2625 | <b>4650</b> |
| <b>2014</b> | Male   | 43.3 | 19.2 | 26.7 | 29.8 | 24.3 | 34.2 | 27.9 | 24.6 | 13.4 | 1964 |             |
|             | Female | 56.7 | 22.7 | 27.6 | 28.3 | 21.4 | 33.6 | 28.3 | 25.8 | 12.4 | 2568 | <b>4532</b> |

| Year        |        | Gender (%) | Age Group (%) |       |       |       | IMD Quintile       |      |      |      |                   | Sample | Total Sample |
|-------------|--------|------------|---------------|-------|-------|-------|--------------------|------|------|------|-------------------|--------|--------------|
|             |        |            | 25-34         | 35-44 | 45-54 | 55-64 | 1 (Least Deprived) | 2    | 3    | 4    | 5 (Most Deprived) |        |              |
| <b>2001</b> | Male   | 44.8       | 24.0          | 27.8  | 26.1  | 22.2  | 16.7               | 15.2 | 19.2 | 21.0 | 28.0              | 4211   |              |
|             | Female | 55.2       | 24.8          | 29.6  | 25.6  | 20.1  | 16.4               | 14.8 | 20.0 | 22.1 | 26.8              | 5184   | <b>9395</b>  |
| <b>2002</b> | Male   | 42.7       | 22.9          | 31.1  | 23.9  | 22.1  | 16.6               | 16.6 | 18.6 | 22.2 | 26.0              | 2080   |              |
|             | Female | 57.3       | 26.8          | 31.0  | 22.7  | 19.6  | 17.2               | 16.0 | 19.0 | 21.6 | 26.2              | 2794   | <b>4874</b>  |
| <b>2003</b> | Male   | 44.6       | 22.7          | 28.4  | 24.5  | 24.5  | 22.6               | 20.8 | 19.9 | 20.7 | 16.1              | 4204   |              |
|             | Female | 55.4       | 23.1          | 29.7  | 23.4  | 23.8  | 23.2               | 20.1 | 19.8 | 20.7 | 16.2              | 5229   | <b>9433</b>  |
| <b>2004</b> | Male   | 42.9       | 23.2          | 27.7  | 22.8  | 26.3  | 23.4               | 23.2 | 19.1 | 20.3 | 14.1              | 1786   |              |
|             | Female | 57.1       | 21.3          | 29.8  | 24.3  | 24.6  | 22.3               | 22.8 | 17.8 | 19.9 | 17.2              | 2380   | <b>4166</b>  |

1  
2  
3  
4  
5  
6  
7  
8  
9  
10  
11  
12  
13  
14  
15  
16  
17  
18  
19  
20  
21  
22  
23  
24  
25  
26  
27  
28  
29  
30  
31  
32  
33  
34  
35  
36  
37  
38  
39  
40  
41  
42  
43  
44  
45  
46  
47

|             |        |      |      |      |      |      |      |      |      |      |      |      |             |
|-------------|--------|------|------|------|------|------|------|------|------|------|------|------|-------------|
| <b>2005</b> | Male   | 44.3 | 22.0 | 25.0 | 26.9 | 26.2 | 23.2 | 21.3 | 20.5 | 20.6 | 14.5 | 2082 |             |
|             | Female | 55.7 | 22.4 | 27.4 | 25.9 | 24.3 | 22.2 | 21.6 | 19.1 | 20.7 | 16.4 | 2618 | <b>4700</b> |
| <b>2006</b> | Male   | 44.4 | 19.8 | 28.2 | 25.0 | 26.9 | 20.9 | 21.4 | 21.4 | 19.8 | 16.5 | 3907 |             |
|             | Female | 55.6 | 22.0 | 28.8 | 24.6 | 24.7 | 20.2 | 22.7 | 21.0 | 19.4 | 16.7 | 4888 | <b>8795</b> |
| <b>2008</b> | Male   | 44.4 | 21.1 | 27.2 | 24.7 | 27.0 | 22.3 | 20.3 | 19.9 | 19.4 | 18.1 | 4169 |             |
|             | Female | 55.6 | 22.3 | 27.5 | 25.2 | 25.0 | 22.6 | 19.9 | 20.0 | 19.2 | 18.3 | 5230 | <b>9399</b> |
| <b>2009</b> | Male   | 45.1 | 20.6 | 27.8 | 25.8 | 25.8 | 20.4 | 22.4 | 20.4 | 20.0 | 16.9 | 1282 |             |
|             | Female | 54.9 | 22.3 | 29.3 | 24.3 | 24.2 | 20.6 | 21.4 | 21.2 | 20.0 | 16.7 | 1559 | <b>2841</b> |
| <b>2010</b> | Male   | 43.1 | 20.3 | 26.1 | 26.7 | 26.9 | 23.4 | 19.8 | 20.0 | 19.0 | 17.9 | 2129 |             |
|             | Female | 56.9 | 21.9 | 26.6 | 28.1 | 23.6 | 23.7 | 19.7 | 20.0 | 19.5 | 17.3 | 2806 | <b>4935</b> |
| <b>2012</b> | Male   | 43.4 | 19.8 | 26.1 | 26.9 | 27.3 | 22.1 | 21.1 | 20.2 | 19.3 | 17.4 | 2030 |             |
|             | Female | 56.6 | 22.8 | 25.9 | 28.0 | 23.4 | 22.7 | 20.7 | 19.9 | 19.2 | 17.6 | 2649 | <b>4679</b> |
| <b>2014</b> | Male   | 43.2 | 19.3 | 26.6 | 29.9 | 24.3 | 23.5 | 20.3 | 18.4 | 18.7 | 19.1 | 1969 |             |
|             | Female | 56.8 | 22.6 | 27.6 | 28.1 | 21.8 | 21.7 | 19.6 | 20.0 | 19.7 | 19.1 | 2592 | <b>4561</b> |

**Appendix 2: Age-standardised GHQ caseness in men and women aged 25-64 years, 1991-2014**

(displayed in Figure 1 in main text)

| Year | Men         |                   |              |              | Women       |                   |              |              |
|------|-------------|-------------------|--------------|--------------|-------------|-------------------|--------------|--------------|
|      | Sample Size | Adjusted Est. (%) | Lower 95% CI | Upper 95% CI | Sample Size | Adjusted Est. (%) | Lower 95% CI | Upper 95% CI |
| 1991 | 942         | 12.17             | 10.06        | 14.28        | 1078        | 19.46             | 17.08        | 21.84        |
| 1992 | 1184        | 14.48             | 12.44        | 16.52        | 1316        | 19.71             | 17.52        | 21.90        |
| 1993 | 5030        | 14.04             | 13.07        | 15.01        | 5544        | 18.82             | 17.78        | 19.86        |
| 1994 | 4704        | 13.04             | 12.06        | 14.02        | 5361        | 19.17             | 18.10        | 20.24        |
| 1997 | 2559        | 12.77             | 11.47        | 14.07        | 2860        | 19.06             | 17.60        | 20.52        |
| 1998 | 4582        | 13.14             | 12.15        | 14.13        | 5254        | 17.98             | 16.94        | 19.03        |
| 1999 | 2257        | 15.32             | 13.83        | 16.81        | 2543        | 18.87             | 17.33        | 20.41        |
| 2000 | 2311        | 11.97             | 10.63        | 13.30        | 2733        | 16.44             | 15.03        | 17.85        |
| 2001 | 4360        | 11.38             | 10.43        | 12.32        | 5193        | 15.30             | 14.31        | 16.28        |
| 2002 | 2016        | 14.35             | 12.81        | 15.89        | 2633        | 18.97             | 17.44        | 20.50        |
| 2003 | 4117        | 11.86             | 10.87        | 12.85        | 4941        | 14.80             | 13.81        | 15.80        |
| 2004 | 1782        | 11.66             | 10.16        | 13.17        | 2327        | 15.18             | 13.71        | 16.64        |
| 2005 | 2076        | 11.57             | 10.19        | 12.94        | 2555        | 15.99             | 14.57        | 17.41        |
| 2006 | 3896        | 11.95             | 10.93        | 12.98        | 4795        | 15.58             | 14.55        | 16.61        |
| 2008 | 4165        | 11.62             | 10.64        | 12.60        | 5135        | 16.01             | 15.01        | 17.02        |
| 2009 | 1278        | 16.80             | 14.75        | 18.86        | 1528        | 17.13             | 15.23        | 19.04        |
| 2010 | 2123        | 14.58             | 13.07        | 16.09        | 2759        | 16.66             | 15.27        | 18.05        |
| 2012 | 2025        | 12.67             | 11.22        | 14.11        | 2625        | 18.72             | 17.22        | 20.21        |
| 2014 | 1964        | 12.90             | 11.40        | 14.40        | 2568        | 17.67             | 16.19        | 19.15        |



**Appendix 3: Adjusted odds ratio and % point difference in GHQ caseness by gender, 1991-2014**

(displayed in Figure 1 in main text)

|      | Model 1: Adjusted for age |         |                    | Model 2: Adjusted for age, education, employment |         |                   |
|------|---------------------------|---------|--------------------|--------------------------------------------------|---------|-------------------|
| Year | OR (95% CI)               | p-value | % Diff. (95% CI)   | OR (95% CI)                                      | p-value | % Diff. (95% CI)  |
| 1991 | 1.76 (1.38-2.26)          | <0.001  | 7.61 (4.31-10.90)  | 1.83 (1.39-2.40)                                 | <0.001  | 7.85 (4.33-11.37) |
| 1992 | 1.48 (1.20-1.83)          | <0.001  | 5.53 (2.53-8.52)   | 1.57 (1.24-1.98)                                 | <0.001  | 6.23 (2.95-9.50)  |
| 1993 | 1.43 (1.28-1.58)          | <0.001  | 4.91 (3.47-6.35)   | 1.52 (1.35-1.70)                                 | <0.001  | 5.64 (4.11-7.17)  |
| 1994 | 1.60 (1.44-1.79)          | <0.001  | 6.42 (4.94-7.89)   | 1.76 (1.57-1.98)                                 | <0.001  | 7.44 (5.89-9.00)  |
| 1997 | 1.60 (1.38-1.85)          | <0.001  | 6.31 (4.31-8.31)   | 1.68 (1.43-1.98)                                 | <0.001  | 6.73 (4.63-8.84)  |
| 1998 | 1.47 (1.32-1.64)          | <0.001  | 5.11 (3.65-6.58)   | 1.58 (1.40-1.78)                                 | <0.001  | 5.79 (4.26-7.33)  |
| 1999 | 1.29 (1.11-1.51)          | 0.001   | 3.68 (1.52-5.83)   | 1.41 (1.20-1.67)                                 | <0.001  | 4.67 (2.42-6.91)  |
| 2000 | 1.45 (1.23-1.70)          | <0.001  | 4.56 (2.58-6.54)   | 1.62 (1.35-1.95)                                 | <0.001  | 5.52 (3.43-7.61)  |
| 2001 | 1.41 (1.25-1.59)          | <0.001  | 4.04 (2.64-5.45)   | 1.51 (1.32-1.72)                                 | <0.001  | 4.55 (3.10-6.01)  |
| 2002 | 1.41 (1.20-1.65)          | <0.001  | 4.77 (2.55-6.98)   | 1.50 (1.26-1.79)                                 | <0.001  | 5.41 (3.11-7.71)  |
| 2003 | 1.27 (1.12-1.44)          | <0.001  | 2.74 (1.30-4.17)   | 1.34 (1.17-1.54)                                 | <0.001  | 3.19 (1.69-4.69)  |
| 2004 | 1.33 (1.10-1.60)          | 0.004   | 3.22 (1.07-5.37)   | 1.36 (1.10-1.69)                                 | 0.004   | 3.32 (1.06-5.57)  |
| 2005 | 1.49 (1.25-1.78)          | <0.001  | 4.68 (2.67-6.70)   | 1.65 (1.36-2.01)                                 | <0.001  | 5.39 (3.32-7.45)  |
| 2006 | 1.32 (1.16-1.50)          | <0.001  | 3.23 (1.73-4.72)   | 1.39 (1.21-1.60)                                 | <0.001  | 3.54 (2.03-5.05)  |
| 2008 | 1.45 (1.28-1.64)          | <0.001  | 4.35 (2.91-5.79)   | 1.53 (1.33-1.75)                                 | <0.001  | 4.53 (3.07-5.99)  |
| 2009 | 0.98 (0.80-1.21)          | 0.866   | -0.25 (-3.12-2.62) | 1.09 (0.87-1.37)                                 | 0.446   | 1.12 (-1.75-3.98) |
| 2010 | 1.17 (0.99-1.39)          | 0.065   | 2.08 (-0.11-4.27)  | 1.22 (1.01-1.46)                                 | 0.034   | 2.39 (0.19-4.58)  |
| 2012 | 1.57 (1.32-1.86)          | <0.001  | 5.93 (3.70-8.15)   | 1.79 (1.48-2.16)                                 | <0.001  | 6.78 (4.61-8.94)  |
| 2014 | 1.42 (1.19-1.70)          | <0.001  | 4.53 (2.28-6.78)   | 1.43 (1.19-1.71)                                 | <0.001  | 4.51 (2.27-6.75)  |

## Appendix 4: Full multiple logistic regression models for participants of each gender, 2001-2014

| Regression models for men (n=24,930)   |                                |         |              |              |                                            |         |              |              |                                                    |         |              |              |
|----------------------------------------|--------------------------------|---------|--------------|--------------|--------------------------------------------|---------|--------------|--------------|----------------------------------------------------|---------|--------------|--------------|
|                                        | Model 1: Adjusted for age, IMD |         |              |              | Model 2: Adjusted for age, IMD, employment |         |              |              | Model 3: Adjusted for age, IMD, employment, income |         |              |              |
| Year                                   | Odds Ratio                     | p-value | Lower 95% CI | Upper 95% CI | Odds Ratio                                 | p-value | Lower 95% CI | Upper 95% CI | Odds Ratio                                         | p-value | Lower 95% CI | Upper 95% CI |
| 2001                                   | 0.93                           | 0.330   | 0.80         | 1.08         | 0.89                                       | 0.147   | 0.76         | 1.04         | 0.86                                               | 0.069   | 0.73         | 1.01         |
| 2002                                   | 1.27                           | 0.007   | 1.07         | 1.51         | 1.29                                       | 0.006   | 1.07         | 1.54         | 1.26                                               | 0.014   | 1.05         | 1.51         |
| 2003                                   | 1.06                           | 0.481   | 0.91         | 1.23         | 0.97                                       | 0.667   | 0.82         | 1.13         | 0.94                                               | 0.475   | 0.80         | 1.11         |
| 2004                                   | 1.11                           | 0.272   | 0.92         | 1.35         | 1.07                                       | 0.505   | 0.87         | 1.31         | 1.05                                               | 0.646   | 0.86         | 1.29         |
| 2005                                   | 1.03                           | 0.722   | 0.86         | 1.24         | 0.92                                       | 0.400   | 0.76         | 1.12         | 0.90                                               | 0.303   | 0.74         | 1.10         |
| 2006                                   | 1.06                           | 0.476   | 0.91         | 1.24         | 1.04                                       | 0.676   | 0.88         | 1.22         | 1.03                                               | 0.765   | 0.87         | 1.21         |
| 2008                                   | 1.00                           | -       | -            | -            | 1.00                                       | -       | -            | -            | 1.00                                               | -       | -            | -            |
| 2009                                   | 1.64                           | <0.001  | 1.34         | 2.00         | 1.55                                       | <0.001  | 1.25         | 1.93         | 1.53                                               | <0.001  | 1.24         | 1.91         |
| 2010                                   | 1.28                           | 0.009   | 1.06         | 1.53         | 1.26                                       | 0.021   | 1.04         | 1.52         | 1.26                                               | 0.018   | 1.04         | 1.53         |
| 2012                                   | 1.15                           | 0.147   | 0.95         | 1.38         | 1.10                                       | 0.340   | 0.91         | 1.33         | 1.10                                               | 0.342   | 0.91         | 1.33         |
| 2014                                   | 1.13                           | 0.215   | 0.93         | 1.37         | 1.17                                       | 0.126   | 0.96         | 1.43         | 1.18                                               | 0.108   | 0.96         | 1.44         |
| Regression models for women (n=31,413) |                                |         |              |              |                                            |         |              |              |                                                    |         |              |              |
|                                        | Model 1: Adjusted for age, IMD |         |              |              | Model 2: Adjusted for age, IMD, employment |         |              |              | Model 3: Adjusted for age, IMD, employment, income |         |              |              |
| Year                                   | Odds Ratio                     | p-value | Lower 95% CI | Upper 95% CI | Odds Ratio                                 | p-value | Lower 95% CI | Upper 95% CI | Odds Ratio                                         | p-value | Lower 95% CI | Upper 95% CI |
| 2001                                   | 0.94                           | 0.280   | 0.83         | 1.05         | 0.91                                       | 0.143   | 0.81         | 1.03         | 0.87                                               | 0.030   | 0.78         | 0.99         |
| 2002                                   | 1.14                           | 0.049   | 1.00         | 1.31         | 1.13                                       | 0.078   | 0.99         | 1.30         | 1.10                                               | 0.162   | 0.96         | 1.27         |
| 2003                                   | 0.92                           | 0.192   | 0.82         | 1.04         | 0.91                                       | 0.112   | 0.80         | 1.02         | 0.87                                               | 0.026   | 0.77         | 0.98         |
| 2004                                   | 0.93                           | 0.358   | 0.80         | 1.08         | 0.91                                       | 0.218   | 0.78         | 1.06         | 0.88                                               | 0.112   | 0.75         | 1.03         |
| 2005                                   | 1.06                           | 0.426   | 0.92         | 1.22         | 1.05                                       | 0.531   | 0.91         | 1.21         | 1.02                                               | 0.762   | 0.88         | 1.18         |
| 2006                                   | 0.91                           | 0.153   | 0.81         | 1.03         | 0.90                                       | 0.102   | 0.80         | 1.02         | 0.89                                               | 0.077   | 0.79         | 1.01         |
| 2008                                   | 1.00                           | -       | -            | -            | 1.00                                       | -       | -            | -            | 1.00                                               | -       | -            | -            |
| 2009                                   | 1.06                           | 0.537   | 0.89         | 1.25         | 1.07                                       | 0.429   | 0.90         | 1.28         | 1.07                                               | 0.431   | 0.90         | 1.28         |
| 2010                                   | 1.00                           | 0.980   | 0.86         | 1.15         | 0.99                                       | 0.849   | 0.85         | 1.14         | 0.99                                               | 0.922   | 0.86         | 1.15         |
| 2012                                   | 1.24                           | 0.003   | 1.08         | 1.42         | 1.24                                       | 0.003   | 1.07         | 1.43         | 1.25                                               | 0.002   | 1.09         | 1.45         |
| 2014                                   | 1.10                           | 0.208   | 0.95         | 1.27         | 1.11                                       | 0.171   | 0.96         | 1.28         | 1.12                                               | 0.138   | 0.97         | 1.29         |

**Appendix 5: Age-sex standardised GHQ caseness by IMD quintile in 25–64-year-olds, 2001-2014**  
(displayed in Figure 2 in main text)

| Year        | Quintile   | Sample Size | Adjusted Est. (%) | Lower 95% CI | Upper 95% CI | Year        | Quintile   | Sample Size | Adjusted Est. (%) | Lower 95% CI | Upper 95% CI |
|-------------|------------|-------------|-------------------|--------------|--------------|-------------|------------|-------------|-------------------|--------------|--------------|
| <b>2001</b> | Least Dep. | 1549        | 11.80             | 10.20        | 13.41        | <b>2002</b> | Least Dep. | 825         | 12.65             | 10.35        | 14.94        |
|             | 2          | 1403        | 9.36              | 7.83         | 10.88        |             | 2          | 794         | 13.74             | 11.37        | 16.11        |
|             | 3          | 1846        | 13.38             | 11.83        | 14.94        |             | 3          | 916         | 13.26             | 11.11        | 15.42        |
|             | 4          | 2030        | 14.06             | 12.56        | 15.57        |             | 4          | 1065        | 19.99             | 17.52        | 22.46        |
|             | Most Dep.  | 2567        | 16.42             | 14.97        | 17.88        |             | Most Dep.  | 1274        | 20.94             | 18.64        | 23.24        |
| <b>2003</b> | Least Dep. | 2163        | 11.38             | 10.00        | 12.75        | <b>2004</b> | Least Dep. | 948         | 11.98             | 9.73         | 14.22        |
|             | 2          | 1924        | 11.19             | 9.78         | 12.61        |             | 2          | 957         | 10.79             | 8.78         | 12.80        |
|             | 3          | 1872        | 10.98             | 9.55         | 12.40        |             | 3          | 764         | 11.07             | 8.87         | 13.28        |
|             | 4          | 1950        | 16.18             | 14.54        | 17.83        |             | 4          | 836         | 15.66             | 13.18        | 18.13        |
|             | Most Dep.  | 1524        | 18.51             | 16.53        | 20.49        |             | Most Dep.  | 661         | 19.56             | 16.43        | 22.70        |
| <b>2005</b> | Least Dep. | 1064        | 9.55              | 7.73         | 11.37        | <b>2006</b> | Least Dep. | 1806        | 10.27             | 8.81         | 11.73        |
|             | 2          | 1008        | 12.23             | 10.22        | 14.24        |             | 2          | 1943        | 12.50             | 11.00        | 13.99        |
|             | 3          | 927         | 12.18             | 10.08        | 14.27        |             | 3          | 1864        | 11.75             | 10.28        | 13.21        |
|             | 4          | 970         | 15.05             | 12.81        | 17.28        |             | 4          | 1719        | 15.71             | 13.97        | 17.45        |
|             | Most Dep.  | 731         | 23.72             | 20.53        | 26.92        |             | Most Dep.  | 1463        | 20.68             | 18.56        | 22.80        |
| <b>2008</b> | Least Dep. | 2108        | 10.44             | 9.10         | 11.78        | <b>2009</b> | Least Dep. | 582         | 14.92             | 11.95        | 17.90        |
|             | 2          | 1889        | 11.11             | 9.67         | 12.54        |             | 2          | 621         | 11.09             | 8.62         | 13.57        |
|             | 3          | 1877        | 12.83             | 11.33        | 14.33        |             | 3          | 593         | 17.91             | 14.79        | 21.03        |
|             | 4          | 1815        | 15.12             | 13.47        | 16.76        |             | 4          | 568         | 19.51             | 16.21        | 22.81        |
|             | Most Dep.  | 1710        | 20.54             | 18.59        | 22.50        |             | Most Dep.  | 477         | 24.07             | 20.06        | 28.08        |
| <b>2010</b> | Least Dep. | 1162        | 13.73             | 11.66        | 15.81        | <b>2012</b> | Least Dep. | 1048        | 10.67             | 8.72         | 12.62        |
|             | 2          | 973         | 11.60             | 9.55         | 13.65        |             | 2          | 977         | 14.40             | 12.22        | 16.58        |
|             | 3          | 985         | 15.53             | 13.28        | 17.78        |             | 3          | 937         | 14.50             | 12.26        | 16.75        |
|             | 4          | 951         | 17.48             | 15.05        | 19.92        |             | 4          | 899         | 16.83             | 14.40        | 19.26        |
|             | Most Dep.  | 864         | 22.28             | 19.47        | 25.09        |             | Most Dep.  | 818         | 24.18             | 21.21        | 27.16        |
| <b>2014</b> | Least Dep. | 1024        | 10.71             | 8.80         | 12.62        |             |            |             |                   |              |              |
|             | 2          | 907         | 13.52             | 11.27        | 15.76        |             |            |             |                   |              |              |
|             | 3          | 880         | 15.30             | 12.93        | 17.67        |             |            |             |                   |              |              |
|             | 4          | 879         | 16.04             | 13.61        | 18.48        |             |            |             |                   |              |              |
|             | Most Dep.  | 871         | 21.91             | 19.10        | 24.73        |             |            |             |                   |              |              |

**Appendix 6: Age-sex standardised GHQ caseness by education level in 25–64-year-olds, 1991-2014**

(displayed in Figure 3 in main text)

| Year        | Educ. Level | Sample Size | Adjusted Est. (%) | Lower 95% CI | Upper 95% CI | Year        | Educ. Level | Sample Size | Adjusted Est. (%) | Lower 95% CI | Upper 95% CI |
|-------------|-------------|-------------|-------------------|--------------|--------------|-------------|-------------|-------------|-------------------|--------------|--------------|
| <b>1991</b> | Degree      | 238         | 16.92             | 11.61        | 22.24        | <b>1992</b> | Degree      | 295         | 16.88             | 12.67        | 21.09        |
|             | A-Level     | 375         | 19.29             | 14.49        | 24.08        |             | A-Level     | 551         | 16.69             | 13.28        | 20.10        |
|             | GCSE        | 669         | 13.85             | 11.15        | 16.54        |             | GCSE        | 884         | 17.08             | 14.36        | 19.79        |
|             | None        | 738         | 15.65             | 12.81        | 18.48        |             | None        | 770         | 16.57             | 13.83        | 19.30        |
| <b>1993</b> | Degree      | 1356        | 18.18             | 15.56        | 20.79        | <b>1994</b> | Degree      | 1308        | 17.61             | 15.39        | 19.82        |
|             | A-Level     | 2286        | 15.55             | 13.96        | 17.14        |             | A-Level     | 2213        | 15.20             | 13.57        | 16.83        |
|             | GCSE        | 3508        | 15.90             | 14.61        | 17.18        |             | GCSE        | 3445        | 14.83             | 13.55        | 16.11        |
|             | None        | 3424        | 17.34             | 15.98        | 18.70        |             | None        | 3099        | 17.03             | 15.65        | 18.41        |
| <b>1997</b> | Degree      | 892         | 12.23             | 9.97         | 14.49        | <b>1998</b> | Degree      | 1642        | 14.66             | 12.75        | 16.56        |
|             | A-Level     | 1344        | 16.23             | 14.13        | 18.32        |             | A-Level     | 2362        | 15.38             | 13.88        | 16.88        |
|             | GCSE        | 1687        | 15.01             | 13.21        | 16.80        |             | GCSE        | 3243        | 15.23             | 13.90        | 16.56        |
|             | None        | 1496        | 16.69             | 14.69        | 18.70        |             | None        | 2589        | 16.92             | 15.30        | 18.53        |
| <b>1999</b> | Degree      | 868         | 15.62             | 13.07        | 18.17        | <b>2000</b> | Degree      | 952         | 12.50             | 10.31        | 14.68        |
|             | A-Level     | 1193        | 15.32             | 13.20        | 17.45        |             | A-Level     | 1382        | 10.75             | 9.08         | 12.42        |
|             | GCSE        | 1494        | 16.36             | 14.37        | 18.36        |             | GCSE        | 1558        | 14.38             | 12.53        | 16.23        |
|             | None        | 1245        | 21.39             | 18.80        | 23.98        |             | None        | 1152        | 19.12             | 16.45        | 21.80        |
| <b>2001</b> | Degree      | 1881        | 12.40             | 10.82        | 13.99        | <b>2002</b> | Degree      | 975         | 14.01             | 11.80        | 16.23        |
|             | A-Level     | 2501        | 12.87             | 11.54        | 14.20        |             | A-Level     | 1299        | 15.52             | 13.45        | 17.59        |
|             | GCSE        | 3115        | 12.47             | 11.27        | 13.67        |             | GCSE        | 1520        | 16.46             | 14.46        | 18.46        |
|             | None        | 2056        | 15.93             | 14.08        | 17.78        |             | None        | 855         | 22.12             | 18.83        | 25.42        |
| <b>2003</b> | Degree      | 1982        | 11.25             | 9.81         | 12.68        | <b>2004</b> | Degree      | 943         | 13.10             | 10.86        | 15.35        |
|             | A-Level     | 2339        | 12.22             | 10.87        | 13.57        |             | A-Level     | 1058        | 12.41             | 10.44        | 14.39        |
|             | GCSE        | 2940        | 12.98             | 11.74        | 14.22        |             | GCSE        | 1224        | 10.94             | 9.15         | 12.73        |
|             | None        | 1797        | 17.16             | 15.05        | 19.27        |             | None        | 884         | 18.26             | 15.36        | 21.17        |
| <b>2005</b> | Degree      | 1094        | 10.98             | 9.08         | 12.87        | <b>2006</b> | Degree      | 2217        | 10.51             | 9.19         | 11.83        |
|             | A-Level     | 1199        | 12.65             | 10.76        | 14.53        |             | A-Level     | 2332        | 13.37             | 11.98        | 14.76        |
|             | GCSE        | 1389        | 13.56             | 11.75        | 15.37        |             | GCSE        | 2536        | 13.73             | 12.36        | 15.11        |
|             | None        | 949         | 19.51             | 16.52        | 22.50        |             | None        | 1606        | 19.69             | 17.47        | 21.91        |
| <b>2008</b> | Degree      | 2388        | 11.04             | 9.76         | 12.32        | <b>2009</b> | Degree      | 745         | 13.01             | 10.43        | 15.59        |
|             | A-Level     | 2604        | 12.55             | 11.28        | 13.83        |             | A-Level     | 715         | 16.15             | 13.42        | 18.87        |
|             | GCSE        | 2669        | 14.82             | 13.44        | 16.20        |             | GCSE        | 873         | 18.41             | 15.76        | 21.06        |
|             | None        | 1639        | 19.43             | 17.18        | 21.68        |             | None        | 473         | 21.60             | 17.46        | 25.74        |
| <b>2010</b> | Degree      | 1387        | 13.21             | 11.40        | 15.02        | <b>2012</b> | Degree      | 1500        | 14.63             | 12.85        | 16.41        |
|             | A-Level     | 1375        | 15.43             | 13.51        | 17.35        |             | A-Level     | 1314        | 14.17             | 12.30        | 16.05        |
|             | GCSE        | 1447        | 15.56             | 13.64        | 17.49        |             | GCSE        | 1188        | 16.87             | 14.69        | 19.06        |
|             | None        | 673         | 21.54             | 17.86        | 25.22        |             | None        | 648         | 19.35             | 16.07        | 22.63        |
| <b>2014</b> | Degree      | 1533        | 12.96             | 11.25        | 14.67        |             |             |             |                   |              |              |
|             | A-Level     | 1273        | 13.61             | 11.68        | 15.53        |             |             |             |                   |              |              |

1  
2  
3  
4  
5  
6  
7  
8  
9  
10  
11  
12  
13  
14  
15  
16  
17  
18  
19  
20  
21  
22  
23  
24  
25  
26  
27  
28  
29  
30  
31  
32  
33  
34  
35  
36  
37  
38  
39  
40  
41  
42  
43  
44  
45  
46  
47  
48  
49  
50  
51  
52  
53  
54  
55  
56  
57  
58  
59  
60

|  |      |      |       |       |       |  |  |  |  |  |  |
|--|------|------|-------|-------|-------|--|--|--|--|--|--|
|  | GCSE | 1145 | 15.13 | 13.00 | 17.26 |  |  |  |  |  |  |
|  | None | 581  | 23.71 | 20.04 | 27.38 |  |  |  |  |  |  |

For peer review only

**Appendix 7: Relative index of inequality in GHQ caseness, 1991-2014**

(displayed in Figure 4 in main text)

| Highest Education Level as Measure of SEP |                      |         |              |              | Area-Level Deprivation as Measure of SEP |                      |         |              |              |
|-------------------------------------------|----------------------|---------|--------------|--------------|------------------------------------------|----------------------|---------|--------------|--------------|
| Year                                      | Incidence Rate Ratio | p-value | Lower 95% CI | Upper 95% CI | Year                                     | Incidence Rate Ratio | p-value | Lower 95% CI | Upper 95% CI |
| 1991                                      | 0.86                 | 0.445   | 0.58         | 1.27         |                                          |                      |         |              |              |
| 1992                                      | 0.88                 | 0.458   | 0.63         | 1.23         |                                          |                      |         |              |              |
| 1993                                      | 1.02                 | 0.797   | 0.87         | 1.21         |                                          |                      |         |              |              |
| 1994                                      | 0.96                 | 0.634   | 0.81         | 1.14         |                                          |                      |         |              |              |
| 1997                                      | 1.25                 | 0.054   | 1.00         | 1.57         |                                          |                      |         |              |              |
| 1998                                      | 1.11                 | 0.232   | 0.93         | 1.32         |                                          |                      |         |              |              |
| 1999                                      | 1.46                 | 0.002   | 1.15         | 1.86         |                                          |                      |         |              |              |
| 2000                                      | 1.79                 | <0.001  | 1.37         | 2.33         |                                          |                      |         |              |              |
| 2001                                      | 1.26                 | 0.018   | 1.04         | 1.53         | 2001                                     | 1.68                 | <0.001  | 1.40         | 2.02         |
| 2002                                      | 1.51                 | 0.001   | 1.18         | 1.93         | 2002                                     | 1.93                 | <0.001  | 1.54         | 2.41         |
| 2003                                      | 1.57                 | <0.001  | 1.27         | 1.92         | 2003                                     | 1.95                 | <0.001  | 1.61         | 2.37         |
| 2004                                      | 1.35                 | 0.066   | 0.98         | 1.86         | 2004                                     | 2.05                 | <0.001  | 1.52         | 2.77         |
| 2005                                      | 1.70                 | <0.001  | 1.29         | 2.24         | 2005                                     | 2.65                 | <0.001  | 2.03         | 3.47         |
| 2006                                      | 1.98                 | <0.001  | 1.61         | 2.43         | 2006                                     | 2.13                 | <0.001  | 1.74         | 2.60         |
| 2008                                      | 1.79                 | <0.001  | 1.47         | 2.18         | 2008                                     | 2.28                 | <0.001  | 1.89         | 2.76         |
| 2009                                      | 2.13                 | <0.001  | 1.52         | 2.99         | 2009                                     | 2.11                 | <0.001  | 1.54         | 2.91         |
| 2010                                      | 1.59                 | 0.001   | 1.22         | 2.08         | 2010                                     | 1.85                 | <0.001  | 1.43         | 2.38         |
| 2012                                      | 1.46                 | 0.005   | 1.12         | 1.90         | 2012                                     | 2.32                 | <0.001  | 1.80         | 2.99         |
| 2014                                      | 1.72                 | <0.001  | 1.31         | 2.26         | 2014                                     | 2.22                 | <0.001  | 1.72         | 2.87         |

STROBE Statement—Checklist of items that should be included in reports of *cross-sectional studies*

|                              | Item No | Recommendation                                                                                                                                                                                    | Page/ Line                            |
|------------------------------|---------|---------------------------------------------------------------------------------------------------------------------------------------------------------------------------------------------------|---------------------------------------|
| <b>Title and abstract</b>    | 1       | (a) Indicate the study's design with a commonly used term in the title or the abstract                                                                                                            | p1, ln1-3                             |
|                              |         | (b) Provide in the abstract an informative and balanced summary of what was done and what was found                                                                                               | p2, ln2-25                            |
| <b>Introduction</b>          |         |                                                                                                                                                                                                   |                                       |
| Background/rationale         | 2       | Explain the scientific background and rationale for the investigation being reported                                                                                                              | p3, ln2-27                            |
| Objectives                   | 3       | State specific objectives, including any prespecified hypotheses                                                                                                                                  | p3, ln28-30                           |
| <b>Methods</b>               |         |                                                                                                                                                                                                   |                                       |
| Study design                 | 4       | Present key elements of study design early in the paper                                                                                                                                           | p4, ln3-5                             |
| Setting                      | 5       | Describe the setting, locations, and relevant dates, including periods of recruitment, exposure, follow-up, and data collection                                                                   | p4, ln3-7                             |
| Participants                 | 6       | (a) Give the eligibility criteria, and the sources and methods of selection of participants                                                                                                       | p4, ln11-15                           |
| Variables                    | 7       | Clearly define all outcomes, exposures, predictors, potential confounders, and effect modifiers. Give diagnostic criteria, if applicable                                                          | p4, ln24-30<br>p5, ln1-15             |
| Data sources/<br>measurement | 8*      | For each variable of interest, give sources of data and details of methods of assessment (measurement). Describe comparability of assessment methods if there is more than one group              | p5, ln24-30<br>p6, ln1-15             |
| Bias                         | 9       | Describe any efforts to address potential sources of bias                                                                                                                                         | p5, ln7<br>p5, ln14-15<br>p6, ln10-11 |
| Study size                   | 10      | Explain how the study size was arrived at                                                                                                                                                         | n/a                                   |
| Quantitative<br>variables    | 11      | Explain how quantitative variables were handled in the analyses. If applicable, describe which groupings were chosen and why                                                                      | p6, ln2                               |
| Statistical methods          | 12      | (a) Describe all statistical methods, including those used to control for confounding                                                                                                             | p6, ln17-32<br>p7, ln1-7              |
|                              |         | (b) Describe any methods used to examine subgroups and interactions                                                                                                                               | p6, ln17-32<br>p7, ln1-7              |
|                              |         | (c) Explain how missing data were addressed                                                                                                                                                       | p5, ln12-14                           |
|                              |         | (d) If applicable, describe analytical methods taking account of sampling strategy                                                                                                                | p5, ln7                               |
|                              |         | (e) Describe any sensitivity analyses                                                                                                                                                             | p5, ln14-15                           |
| <b>Results</b>               |         |                                                                                                                                                                                                   |                                       |
| Participants                 | 13*     | (a) Report numbers of individuals at each stage of study—eg numbers potentially eligible, examined for eligibility, confirmed eligible, included in the study, completing follow-up, and analysed | p5, ln16-22                           |
|                              |         | (b) Give reasons for non-participation at each stage                                                                                                                                              | p5, ln16-22                           |
|                              |         | (c) Consider use of a flow diagram                                                                                                                                                                | n/a                                   |
| Descriptive data             | 14*     | (a) Give characteristics of study participants (eg demographic, clinical, social) and information on exposures and potential confounders                                                          | p8, ln2-5                             |
|                              |         | (b) Indicate number of participants with missing data for each variable of interest                                                                                                               | p5, ln16-22                           |
| Outcome data                 | 15*     | Report numbers of outcome events or summary measures                                                                                                                                              | p8-p11                                |

|    |                          |    |                                                                                     |
|----|--------------------------|----|-------------------------------------------------------------------------------------|
| 1  |                          |    |                                                                                     |
| 2  | Main results             | 16 | (a) Give unadjusted estimates and, if applicable, confounder-adjusted               |
| 3  |                          |    | estimates and their precision (eg, 95% confidence interval). Make clear which       |
| 4  |                          |    | confounders were adjusted for and why they were included                            |
| 5  |                          |    | Table 1                                                                             |
| 6  |                          |    | (b) Report category boundaries when continuous variables were categorized           |
| 7  |                          |    | p6, ln2                                                                             |
| 8  |                          |    | (c) If relevant, consider translating estimates of relative risk into absolute risk |
| 9  |                          |    | for a meaningful time period                                                        |
| 10 |                          |    | Table 1                                                                             |
| 11 | Other analyses           | 17 | Report other analyses done—eg analyses of subgroups and interactions, and           |
| 12 |                          |    | sensitivity analyses                                                                |
| 13 |                          |    | p10, ln25-30                                                                        |
| 14 |                          |    | p11, ln10                                                                           |
| 15 | <b>Discussion</b>        |    |                                                                                     |
| 16 | Key results              | 18 | Summarise key results with reference to study objectives                            |
| 17 |                          |    | p12, ln2-7                                                                          |
| 18 | Limitations              | 19 | Discuss limitations of the study, taking into account sources of potential bias     |
| 19 |                          |    | or imprecision. Discuss both direction and magnitude of any potential bias          |
| 20 |                          |    | p13, ln24-33                                                                        |
| 21 |                          |    | p14, ln1-3                                                                          |
| 22 | Interpretation           | 20 | Give a cautious overall interpretation of results considering objectives,           |
| 23 |                          |    | limitations, multiplicity of analyses, results from similar studies, and other      |
| 24 |                          |    | relevant evidence                                                                   |
| 25 |                          |    | Throughout                                                                          |
| 26 | Generalisability         | 21 | Discuss the generalisability (external validity) of the study results               |
| 27 |                          |    | p14, ln26-28                                                                        |
| 28 | <b>Other information</b> |    |                                                                                     |
| 29 | Funding                  | 22 | Give the source of funding and the role of the funders for the present study        |
| 30 |                          |    | and, if applicable, for the original study on which the present article is based    |
| 31 |                          |    | p15, ln14-16                                                                        |

\*Give information separately for exposed and unexposed groups.

**Note:** An Explanation and Elaboration article discusses each checklist item and gives methodological background and published examples of transparent reporting. The STROBE checklist is best used in conjunction with this article (freely available on the Web sites of PLoS Medicine at <http://www.plosmedicine.org/>, Annals of Internal Medicine at <http://www.annals.org/>, and Epidemiology at <http://www.epidem.com/>). Information on the STROBE Initiative is available at [www.strobe-statement.org](http://www.strobe-statement.org).
