# Supplementary material for: Trends in gender and socioeconomic inequalities in mental health following the Great Recession and subsequent austerity policies: a repeat cross-sectional analysis of the Health Surveys for England
Source: PubMed Central journal article supplement (PMC6119415; doi:10.1136/bmjopen-2018-022924), 2018-08-30
Supplement: bmjopen-2018-022924supp001.pdf [file bmjopen-2018-022924supp001.pdf]

**Supplementary Appendix**

**Appendix 1: Characteristics of study participants**

| Year |        | Gender (%) | Age Group (%) |       |       |       | Highest Education Level (%) |         |      |      | Sample | Total Sample |
|------|--------|------------|---------------|-------|-------|-------|-----------------------------|---------|------|------|--------|--------------|
|      |        |            | 25-34         | 35-44 | 45-54 | 55-64 | Degree                      | A-Level | GCSE | None |        |              |
| 1991 | Male   | 46.6       | 29.7          | 27.6  | 21.9  | 20.8  | 16.0                        | 20.1    | 32.1 | 31.9 | 942    | 2020         |
|      | Female | 53.4       | 30.0          | 27.2  | 21.7  | 21.2  | 8.1                         | 17.3    | 34.0 | 40.6 | 1078   |              |
| 1992 | Male   | 48.4       | 28.6          | 28.4  | 23.8  | 19.2  | 15.2                        | 26.0    | 32.5 | 26.3 | 1184   | 2500         |
|      | Female | 51.6       | 29.8          | 28.4  | 21.7  | 20.1  | 8.7                         | 18.5    | 37.9 | 34.9 | 1316   |              |
| 1993 | Male   | 47.6       | 29.2          | 26.1  | 24.9  | 19.8  | 16.4                        | 25.4    | 30.1 | 28.2 | 5030   | 10,574       |
|      | Female | 52.4       | 30.2          | 27.0  | 23.8  | 19.0  | 9.6                         | 18.2    | 35.9 | 36.2 | 5544   |              |
| 1994 | Male   | 46.7       | 29.5          | 27.3  | 23.0  | 20.2  | 15.9                        | 26.5    | 30.0 | 27.5 | 4704   | 10,065       |
|      | Female | 53.3       | 31.0          | 27.2  | 23.1  | 18.8  | 10.4                        | 18.0    | 37.9 | 33.7 | 5361   |              |
| 1997 | Male   | 47.2       | 27.7          | 27.4  | 25.5  | 19.4  | 19.2                        | 28.7    | 28.3 | 23.8 | 2559   | 5419         |
|      | Female | 52.8       | 30.6          | 27.2  | 24.5  | 17.7  | 14.0                        | 21.3    | 33.7 | 31.0 | 2860   |              |
| 1998 | Male   | 46.6       | 27.7          | 26.9  | 25.8  | 19.6  | 19.5                        | 28.0    | 29.5 | 23.1 | 4582   | 9836         |
|      | Female | 53.4       | 29.0          | 28.0  | 24.7  | 18.3  | 14.3                        | 20.6    | 36.0 | 29.2 | 5254   |              |
| 1999 | Male   | 47.0       | 25.4          | 28.1  | 25.4  | 21.0  | 21.0                        | 28.5    | 27.5 | 23.0 | 2257   | 4800         |
|      | Female | 53.0       | 27.4          | 29.9  | 25.7  | 17.0  | 15.5                        | 21.6    | 34.4 | 28.6 | 2543   |              |
| 2000 | Male   | 45.8       | 25.9          | 29.7  | 23.4  | 21.0  | 21.7                        | 30.3    | 27.0 | 21.0 | 2311   | 5044         |
|      | Female | 54.2       | 27.6          | 30.5  | 23.3  | 18.5  | 16.5                        | 25.0    | 34.1 | 24.4 | 2733   |              |
| 2001 | Male   | 45.6       | 24.2          | 28.3  | 25.6  | 21.9  | 22.7                        | 29.2    | 29.4 | 18.7 | 4360   | 9553         |
|      | Female | 54.4       | 25.6          | 30.7  | 25.0  | 18.7  | 17.2                        | 23.6    | 35.3 | 23.9 | 5193   |              |
| 2002 | Male   | 43.4       | 23.0          | 31.5  | 23.8  | 21.7  | 23.1                        | 31.6    | 28.2 | 17.2 | 2016   | 4649         |
|      | Female | 56.6       | 27.8          | 32.1  | 22.0  | 18.2  | 19.4                        | 25.1    | 36.2 | 19.3 | 2633   |              |
| 2003 | Male   | 45.5       | 22.6          | 28.6  | 24.4  | 24.3  | 23.6                        | 28.0    | 29.7 | 18.7 | 4117   | 9058         |
|      | Female | 54.6       | 23.9          | 30.6  | 23.3  | 22.1  | 20.4                        | 24.0    | 34.8 | 20.8 | 4941   |              |

|             |        |      |      |      |      |      |      |      |      |      |      |             |
|-------------|--------|------|------|------|------|------|------|------|------|------|------|-------------|
| <b>2004</b> | Male   | 43.4 | 23.2 | 27.7 | 22.8 | 26.3 | 25.4 | 27.7 | 27.1 | 19.9 | 1782 |             |
|             | Female | 56.6 | 21.8 | 30.3 | 24.3 | 23.5 | 21.1 | 24.3 | 31.9 | 22.8 | 2327 | <b>4109</b> |
| <b>2005</b> | Male   | 44.8 | 22.0 | 25.0 | 26.9 | 26.0 | 25.5 | 29.0 | 26.7 | 18.8 | 2076 |             |
|             | Female | 55.2 | 22.9 | 27.9 | 26.1 | 23.2 | 22.1 | 23.4 | 32.6 | 21.9 | 2555 | <b>4631</b> |
| <b>2006</b> | Male   | 44.8 | 19.9 | 28.2 | 25.0 | 26.9 | 27.2 | 29.9 | 25.6 | 17.3 | 3896 |             |
|             | Female | 55.2 | 22.2 | 29.2 | 24.7 | 23.8 | 24.2 | 24.3 | 32.1 | 19.4 | 4795 | <b>8691</b> |
| <b>2008</b> | Male   | 44.8 | 21.1 | 27.2 | 24.8 | 26.9 | 27.2 | 30.1 | 25.9 | 16.8 | 4165 |             |
|             | Female | 55.2 | 22.7 | 27.9 | 25.4 | 24.1 | 24.5 | 26.3 | 30.9 | 18.3 | 5135 | <b>9300</b> |
| <b>2009</b> | Male   | 45.6 | 20.7 | 27.8 | 25.9 | 25.7 | 27.4 | 26.8 | 29.3 | 16.5 | 1278 |             |
|             | Female | 54.5 | 22.6 | 29.7 | 24.2 | 23.4 | 25.9 | 24.4 | 32.7 | 17.2 | 1528 | <b>2806</b> |
| <b>2010</b> | Male   | 43.5 | 20.3 | 26.1 | 26.7 | 26.8 | 29.6 | 30.2 | 26.6 | 13.6 | 2123 |             |
|             | Female | 56.5 | 22.1 | 26.8 | 28.2 | 22.9 | 27.5 | 26.6 | 32.0 | 13.9 | 2759 | <b>4882</b> |
| <b>2012</b> | Male   | 43.6 | 19.8 | 26.1 | 26.8 | 27.4 | 32.2 | 29.8 | 24.3 | 13.7 | 2025 |             |
|             | Female | 56.5 | 22.9 | 26.1 | 28.2 | 22.9 | 32.3 | 27.1 | 26.5 | 14.1 | 2625 | <b>4650</b> |
| <b>2014</b> | Male   | 43.3 | 19.2 | 26.7 | 29.8 | 24.3 | 34.2 | 27.9 | 24.6 | 13.4 | 1964 |             |
|             | Female | 56.7 | 22.7 | 27.6 | 28.3 | 21.4 | 33.6 | 28.3 | 25.8 | 12.4 | 2568 | <b>4532</b> |

|             |        | Gender (%) | Age Group (%) |       |       |       | IMD Quintile       |      |      |      |                   |        |              |
|-------------|--------|------------|---------------|-------|-------|-------|--------------------|------|------|------|-------------------|--------|--------------|
| Year        |        |            | 25-34         | 35-44 | 45-54 | 55-64 | 1 (Least Deprived) | 2    | 3    | 4    | 5 (Most Deprived) | Sample | Total Sample |
| <b>2001</b> | Male   | 44.8       | 24.0          | 27.8  | 26.1  | 22.2  | 16.7               | 15.2 | 19.2 | 21.0 | 28.0              | 4211   |              |
|             | Female | 55.2       | 24.8          | 29.6  | 25.6  | 20.1  | 16.4               | 14.8 | 20.0 | 22.1 | 26.8              | 5184   | <b>9395</b>  |
| <b>2002</b> | Male   | 42.7       | 22.9          | 31.1  | 23.9  | 22.1  | 16.6               | 16.6 | 18.6 | 22.2 | 26.0              | 2080   |              |
|             | Female | 57.3       | 26.8          | 31.0  | 22.7  | 19.6  | 17.2               | 16.0 | 19.0 | 21.6 | 26.2              | 2794   | <b>4874</b>  |
| <b>2003</b> | Male   | 44.6       | 22.7          | 28.4  | 24.5  | 24.5  | 22.6               | 20.8 | 19.9 | 20.7 | 16.1              | 4204   |              |
|             | Female | 55.4       | 23.1          | 29.7  | 23.4  | 23.8  | 23.2               | 20.1 | 19.8 | 20.7 | 16.2              | 5229   | <b>9433</b>  |
| <b>2004</b> | Male   | 42.9       | 23.2          | 27.7  | 22.8  | 26.3  | 23.4               | 23.2 | 19.1 | 20.3 | 14.1              | 1786   |              |
|             | Female | 57.1       | 21.3          | 29.8  | 24.3  | 24.6  | 22.3               | 22.8 | 17.8 | 19.9 | 17.2              | 2380   | <b>4166</b>  |

|             |        |      |      |      |      |      |      |      |      |      |      |      |             |
|-------------|--------|------|------|------|------|------|------|------|------|------|------|------|-------------|
| <b>2005</b> | Male   | 44.3 | 22.0 | 25.0 | 26.9 | 26.2 | 23.2 | 21.3 | 20.5 | 20.6 | 14.5 | 2082 |             |
|             | Female | 55.7 | 22.4 | 27.4 | 25.9 | 24.3 | 22.2 | 21.6 | 19.1 | 20.7 | 16.4 | 2618 | <b>4700</b> |
| <b>2006</b> | Male   | 44.4 | 19.8 | 28.2 | 25.0 | 26.9 | 20.9 | 21.4 | 21.4 | 19.8 | 16.5 | 3907 |             |
|             | Female | 55.6 | 22.0 | 28.8 | 24.6 | 24.7 | 20.2 | 22.7 | 21.0 | 19.4 | 16.7 | 4888 | <b>8795</b> |
| <b>2008</b> | Male   | 44.4 | 21.1 | 27.2 | 24.7 | 27.0 | 22.3 | 20.3 | 19.9 | 19.4 | 18.1 | 4169 |             |
|             | Female | 55.6 | 22.3 | 27.5 | 25.2 | 25.0 | 22.6 | 19.9 | 20.0 | 19.2 | 18.3 | 5230 | <b>9399</b> |
| <b>2009</b> | Male   | 45.1 | 20.6 | 27.8 | 25.8 | 25.8 | 20.4 | 22.4 | 20.4 | 20.0 | 16.9 | 1282 |             |
|             | Female | 54.9 | 22.3 | 29.3 | 24.3 | 24.2 | 20.6 | 21.4 | 21.2 | 20.0 | 16.7 | 1559 | <b>2841</b> |
| <b>2010</b> | Male   | 43.1 | 20.3 | 26.1 | 26.7 | 26.9 | 23.4 | 19.8 | 20.0 | 19.0 | 17.9 | 2129 |             |
|             | Female | 56.9 | 21.9 | 26.6 | 28.1 | 23.6 | 23.7 | 19.7 | 20.0 | 19.5 | 17.3 | 2806 | <b>4935</b> |
| <b>2012</b> | Male   | 43.4 | 19.8 | 26.1 | 26.9 | 27.3 | 22.1 | 21.1 | 20.2 | 19.3 | 17.4 | 2030 |             |
|             | Female | 56.6 | 22.8 | 25.9 | 28.0 | 23.4 | 22.7 | 20.7 | 19.9 | 19.2 | 17.6 | 2649 | <b>4679</b> |
| <b>2014</b> | Male   | 43.2 | 19.3 | 26.6 | 29.9 | 24.3 | 23.5 | 20.3 | 18.4 | 18.7 | 19.1 | 1969 |             |
|             | Female | 56.8 | 22.6 | 27.6 | 28.1 | 21.8 | 21.7 | 19.6 | 20.0 | 19.7 | 19.1 | 2592 | <b>4561</b> |

## Appendix 2: Age-standardised GHQ caseness in men and women aged 25-64 years, 1991-2014

(displayed in Figure 1 in main text)

| Year | Men         |                   |              |              | Women       |                   |              |              |
|------|-------------|-------------------|--------------|--------------|-------------|-------------------|--------------|--------------|
|      | Sample Size | Adjusted Est. (%) | Lower 95% CI | Upper 95% CI | Sample Size | Adjusted Est. (%) | Lower 95% CI | Upper 95% CI |
| 1991 | 942         | 12.17             | 10.06        | 14.28        | 1078        | 19.46             | 17.08        | 21.84        |
| 1992 | 1184        | 14.48             | 12.44        | 16.52        | 1316        | 19.71             | 17.52        | 21.90        |
| 1993 | 5030        | 14.04             | 13.07        | 15.01        | 5544        | 18.82             | 17.78        | 19.86        |
| 1994 | 4704        | 13.04             | 12.06        | 14.02        | 5361        | 19.17             | 18.10        | 20.24        |
| 1997 | 2559        | 12.77             | 11.47        | 14.07        | 2860        | 19.06             | 17.60        | 20.52        |
| 1998 | 4582        | 13.14             | 12.15        | 14.13        | 5254        | 17.98             | 16.94        | 19.03        |
| 1999 | 2257        | 15.32             | 13.83        | 16.81        | 2543        | 18.87             | 17.33        | 20.41        |
| 2000 | 2311        | 11.97             | 10.63        | 13.30        | 2733        | 16.44             | 15.03        | 17.85        |
| 2001 | 4360        | 11.38             | 10.43        | 12.32        | 5193        | 15.30             | 14.31        | 16.28        |
| 2002 | 2016        | 14.35             | 12.81        | 15.89        | 2633        | 18.97             | 17.44        | 20.50        |
| 2003 | 4117        | 11.86             | 10.87        | 12.85        | 4941        | 14.80             | 13.81        | 15.80        |
| 2004 | 1782        | 11.66             | 10.16        | 13.17        | 2327        | 15.18             | 13.71        | 16.64        |
| 2005 | 2076        | 11.57             | 10.19        | 12.94        | 2555        | 15.99             | 14.57        | 17.41        |
| 2006 | 3896        | 11.95             | 10.93        | 12.98        | 4795        | 15.58             | 14.55        | 16.61        |
| 2008 | 4165        | 11.62             | 10.64        | 12.60        | 5135        | 16.01             | 15.01        | 17.02        |
| 2009 | 1278        | 16.80             | 14.75        | 18.86        | 1528        | 17.13             | 15.23        | 19.04        |
| 2010 | 2123        | 14.58             | 13.07        | 16.09        | 2759        | 16.66             | 15.27        | 18.05        |
| 2012 | 2025        | 12.67             | 11.22        | 14.11        | 2625        | 18.72             | 17.22        | 20.21        |
| 2014 | 1964        | 12.90             | 11.40        | 14.40        | 2568        | 17.67             | 16.19        | 19.15        |

### Appendix 3: Adjusted odds ratio and % point difference in GHQ caseness by gender, 1991-2014

(displayed in Figure 1 in main text)

| Year | Model 1: Adjusted for age |         |                    | Model 2: Adjusted for age, education, employment |         |                   |
|------|---------------------------|---------|--------------------|--------------------------------------------------|---------|-------------------|
|      | OR (95% CI)               | p-value | % Diff. (95% CI)   | OR (95% CI)                                      | p-value | % Diff. (95% CI)  |
| 1991 | 1.76 (1.38-2.26)          | <0.001  | 7.61 (4.31-10.90)  | 1.83 (1.39-2.40)                                 | <0.001  | 7.85 (4.33-11.37) |
| 1992 | 1.48 (1.20-1.83)          | <0.001  | 5.53 (2.53-8.52)   | 1.57 (1.24-1.98)                                 | <0.001  | 6.23 (2.95-9.50)  |
| 1993 | 1.43 (1.28-1.58)          | <0.001  | 4.91 (3.47-6.35)   | 1.52 (1.35-1.70)                                 | <0.001  | 5.64 (4.11-7.17)  |
| 1994 | 1.60 (1.44-1.79)          | <0.001  | 6.42 (4.94-7.89)   | 1.76 (1.57-1.98)                                 | <0.001  | 7.44 (5.89-9.00)  |
| 1997 | 1.60 (1.38-1.85)          | <0.001  | 6.31 (4.31-8.31)   | 1.68 (1.43-1.98)                                 | <0.001  | 6.73 (4.63-8.84)  |
| 1998 | 1.47 (1.32-1.64)          | <0.001  | 5.11 (3.65-6.58)   | 1.58 (1.40-1.78)                                 | <0.001  | 5.79 (4.26-7.33)  |
| 1999 | 1.29 (1.11-1.51)          | 0.001   | 3.68 (1.52-5.83)   | 1.41 (1.20-1.67)                                 | <0.001  | 4.67 (2.42-6.91)  |
| 2000 | 1.45 (1.23-1.70)          | <0.001  | 4.56 (2.58-6.54)   | 1.62 (1.35-1.95)                                 | <0.001  | 5.52 (3.43-7.61)  |
| 2001 | 1.41 (1.25-1.59)          | <0.001  | 4.04 (2.64-5.45)   | 1.51 (1.32-1.72)                                 | <0.001  | 4.55 (3.10-6.01)  |
| 2002 | 1.41 (1.20-1.65)          | <0.001  | 4.77 (2.55-6.98)   | 1.50 (1.26-1.79)                                 | <0.001  | 5.41 (3.11-7.71)  |
| 2003 | 1.27 (1.12-1.44)          | <0.001  | 2.74 (1.30-4.17)   | 1.34 (1.17-1.54)                                 | <0.001  | 3.19 (1.69-4.69)  |
| 2004 | 1.33 (1.10-1.60)          | 0.004   | 3.22 (1.07-5.37)   | 1.36 (1.10-1.69)                                 | 0.004   | 3.32 (1.06-5.57)  |
| 2005 | 1.49 (1.25-1.78)          | <0.001  | 4.68 (2.67-6.70)   | 1.65 (1.36-2.01)                                 | <0.001  | 5.39 (3.32-7.45)  |
| 2006 | 1.32 (1.16-1.50)          | <0.001  | 3.23 (1.73-4.72)   | 1.39 (1.21-1.60)                                 | <0.001  | 3.54 (2.03-5.05)  |
| 2008 | 1.45 (1.28-1.64)          | <0.001  | 4.35 (2.91-5.79)   | 1.53 (1.33-1.75)                                 | <0.001  | 4.53 (3.07-5.99)  |
| 2009 | 0.98 (0.80-1.21)          | 0.866   | -0.25 (-3.12-2.62) | 1.09 (0.87-1.37)                                 | 0.446   | 1.12 (-1.75-3.98) |
| 2010 | 1.17 (0.99-1.39)          | 0.065   | 2.08 (-0.11-4.27)  | 1.22 (1.01-1.46)                                 | 0.034   | 2.39 (0.19-4.58)  |
| 2012 | 1.57 (1.32-1.86)          | <0.001  | 5.93 (3.70-8.15)   | 1.79 (1.48-2.16)                                 | <0.001  | 6.78 (4.61-8.94)  |
| 2014 | 1.42 (1.19-1.70)          | <0.001  | 4.53 (2.28-6.78)   | 1.43 (1.19-1.71)                                 | <0.001  | 4.51 (2.27-6.75)  |

**Appendix 4: Full multiple logistic regression models for participants of each gender, 2001-2014**

| <b>Regression models for men (n=24,930)</b>   |                                |         |              |              |                                            |         |              |              |                                                    |         |              |              |
|-----------------------------------------------|--------------------------------|---------|--------------|--------------|--------------------------------------------|---------|--------------|--------------|----------------------------------------------------|---------|--------------|--------------|
|                                               | Model 1: Adjusted for age, IMD |         |              |              | Model 2: Adjusted for age, IMD, employment |         |              |              | Model 3: Adjusted for age, IMD, employment, income |         |              |              |
| Year                                          | Odds Ratio                     | p-value | Lower 95% CI | Upper 95% CI | Odds Ratio                                 | p-value | Lower 95% CI | Upper 95% CI | Odds Ratio                                         | p-value | Lower 95% CI | Upper 95% CI |
| 2001                                          | 0.93                           | 0.330   | 0.80         | 1.08         | 0.89                                       | 0.147   | 0.76         | 1.04         | 0.86                                               | 0.069   | 0.73         | 1.01         |
| 2002                                          | 1.27                           | 0.007   | 1.07         | 1.51         | 1.29                                       | 0.006   | 1.07         | 1.54         | 1.26                                               | 0.014   | 1.05         | 1.51         |
| 2003                                          | 1.06                           | 0.481   | 0.91         | 1.23         | 0.97                                       | 0.667   | 0.82         | 1.13         | 0.94                                               | 0.475   | 0.80         | 1.11         |
| 2004                                          | 1.11                           | 0.272   | 0.92         | 1.35         | 1.07                                       | 0.505   | 0.87         | 1.31         | 1.05                                               | 0.646   | 0.86         | 1.29         |
| 2005                                          | 1.03                           | 0.722   | 0.86         | 1.24         | 0.92                                       | 0.400   | 0.76         | 1.12         | 0.90                                               | 0.303   | 0.74         | 1.10         |
| 2006                                          | 1.06                           | 0.476   | 0.91         | 1.24         | 1.04                                       | 0.676   | 0.88         | 1.22         | 1.03                                               | 0.765   | 0.87         | 1.21         |
| 2008                                          | 1.00                           | -       | -            | -            | 1.00                                       | -       | -            | -            | 1.00                                               | -       | -            | -            |
| 2009                                          | 1.64                           | <0.001  | 1.34         | 2.00         | 1.55                                       | <0.001  | 1.25         | 1.93         | 1.53                                               | <0.001  | 1.24         | 1.91         |
| 2010                                          | 1.28                           | 0.009   | 1.06         | 1.53         | 1.26                                       | 0.021   | 1.04         | 1.52         | 1.26                                               | 0.018   | 1.04         | 1.53         |
| 2012                                          | 1.15                           | 0.147   | 0.95         | 1.38         | 1.10                                       | 0.340   | 0.91         | 1.33         | 1.10                                               | 0.342   | 0.91         | 1.33         |
| 2014                                          | 1.13                           | 0.215   | 0.93         | 1.37         | 1.17                                       | 0.126   | 0.96         | 1.43         | 1.18                                               | 0.108   | 0.96         | 1.44         |
| <b>Regression models for women (n=31,413)</b> |                                |         |              |              |                                            |         |              |              |                                                    |         |              |              |
|                                               | Model 1: Adjusted for age, IMD |         |              |              | Model 2: Adjusted for age, IMD, employment |         |              |              | Model 3: Adjusted for age, IMD, employment, income |         |              |              |
| Year                                          | Odds Ratio                     | p-value | Lower 95% CI | Upper 95% CI | Odds Ratio                                 | p-value | Lower 95% CI | Upper 95% CI | Odds Ratio                                         | p-value | Lower 95% CI | Upper 95% CI |
| 2001                                          | 0.94                           | 0.280   | 0.83         | 1.05         | 0.91                                       | 0.143   | 0.81         | 1.03         | 0.87                                               | 0.030   | 0.78         | 0.99         |
| 2002                                          | 1.14                           | 0.049   | 1.00         | 1.31         | 1.13                                       | 0.078   | 0.99         | 1.30         | 1.10                                               | 0.162   | 0.96         | 1.27         |
| 2003                                          | 0.92                           | 0.192   | 0.82         | 1.04         | 0.91                                       | 0.112   | 0.80         | 1.02         | 0.87                                               | 0.026   | 0.77         | 0.98         |
| 2004                                          | 0.93                           | 0.358   | 0.80         | 1.08         | 0.91                                       | 0.218   | 0.78         | 1.06         | 0.88                                               | 0.112   | 0.75         | 1.03         |
| 2005                                          | 1.06                           | 0.426   | 0.92         | 1.22         | 1.05                                       | 0.531   | 0.91         | 1.21         | 1.02                                               | 0.762   | 0.88         | 1.18         |
| 2006                                          | 0.91                           | 0.153   | 0.81         | 1.03         | 0.90                                       | 0.102   | 0.80         | 1.02         | 0.89                                               | 0.077   | 0.79         | 1.01         |
| 2008                                          | 1.00                           | -       | -            | -            | 1.00                                       | -       | -            | -            | 1.00                                               | -       | -            | -            |
| 2009                                          | 1.06                           | 0.537   | 0.89         | 1.25         | 1.07                                       | 0.429   | 0.90         | 1.28         | 1.07                                               | 0.431   | 0.90         | 1.28         |
| 2010                                          | 1.00                           | 0.980   | 0.86         | 1.15         | 0.99                                       | 0.849   | 0.85         | 1.14         | 0.99                                               | 0.922   | 0.86         | 1.15         |
| 2012                                          | 1.24                           | 0.003   | 1.08         | 1.42         | 1.24                                       | 0.003   | 1.07         | 1.43         | 1.25                                               | 0.002   | 1.09         | 1.45         |
| 2014                                          | 1.10                           | 0.208   | 0.95         | 1.27         | 1.11                                       | 0.171   | 0.96         | 1.28         | 1.12                                               | 0.138   | 0.97         | 1.29         |

**Appendix 5: Age-sex standardised GHQ caseness by IMD quintile in 25–64-year-olds, 2001-2014**  
(displayed in Figure 2 in main text)

| Year        | Quintile   | Sample Size | Adjusted Est. (%) | Lower 95% CI | Upper 95% CI | Year        | Quintile   | Sample Size | Adjusted Est. (%) | Lower 95% CI | Upper 95% CI |
|-------------|------------|-------------|-------------------|--------------|--------------|-------------|------------|-------------|-------------------|--------------|--------------|
| <b>2001</b> | Least Dep. | 1549        | 11.80             | 10.20        | 13.41        | <b>2002</b> | Least Dep. | 825         | 12.65             | 10.35        | 14.94        |
|             | 2          | 1403        | 9.36              | 7.83         | 10.88        |             | 2          | 794         | 13.74             | 11.37        | 16.11        |
|             | 3          | 1846        | 13.38             | 11.83        | 14.94        |             | 3          | 916         | 13.26             | 11.11        | 15.42        |
|             | 4          | 2030        | 14.06             | 12.56        | 15.57        |             | 4          | 1065        | 19.99             | 17.52        | 22.46        |
|             | Most Dep.  | 2567        | 16.42             | 14.97        | 17.88        |             | Most Dep.  | 1274        | 20.94             | 18.64        | 23.24        |
| <b>2003</b> | Least Dep. | 2163        | 11.38             | 10.00        | 12.75        | <b>2004</b> | Least Dep. | 948         | 11.98             | 9.73         | 14.22        |
|             | 2          | 1924        | 11.19             | 9.78         | 12.61        |             | 2          | 957         | 10.79             | 8.78         | 12.80        |
|             | 3          | 1872        | 10.98             | 9.55         | 12.40        |             | 3          | 764         | 11.07             | 8.87         | 13.28        |
|             | 4          | 1950        | 16.18             | 14.54        | 17.83        |             | 4          | 836         | 15.66             | 13.18        | 18.13        |
|             | Most Dep.  | 1524        | 18.51             | 16.53        | 20.49        |             | Most Dep.  | 661         | 19.56             | 16.43        | 22.70        |
| <b>2005</b> | Least Dep. | 1064        | 9.55              | 7.73         | 11.37        | <b>2006</b> | Least Dep. | 1806        | 10.27             | 8.81         | 11.73        |
|             | 2          | 1008        | 12.23             | 10.22        | 14.24        |             | 2          | 1943        | 12.50             | 11.00        | 13.99        |
|             | 3          | 927         | 12.18             | 10.08        | 14.27        |             | 3          | 1864        | 11.75             | 10.28        | 13.21        |
|             | 4          | 970         | 15.05             | 12.81        | 17.28        |             | 4          | 1719        | 15.71             | 13.97        | 17.45        |
|             | Most Dep.  | 731         | 23.72             | 20.53        | 26.92        |             | Most Dep.  | 1463        | 20.68             | 18.56        | 22.80        |
| <b>2008</b> | Least Dep. | 2108        | 10.44             | 9.10         | 11.78        | <b>2009</b> | Least Dep. | 582         | 14.92             | 11.95        | 17.90        |
|             | 2          | 1889        | 11.11             | 9.67         | 12.54        |             | 2          | 621         | 11.09             | 8.62         | 13.57        |
|             | 3          | 1877        | 12.83             | 11.33        | 14.33        |             | 3          | 593         | 17.91             | 14.79        | 21.03        |
|             | 4          | 1815        | 15.12             | 13.47        | 16.76        |             | 4          | 568         | 19.51             | 16.21        | 22.81        |
|             | Most Dep.  | 1710        | 20.54             | 18.59        | 22.50        |             | Most Dep.  | 477         | 24.07             | 20.06        | 28.08        |
| <b>2010</b> | Least Dep. | 1162        | 13.73             | 11.66        | 15.81        | <b>2012</b> | Least Dep. | 1048        | 10.67             | 8.72         | 12.62        |
|             | 2          | 973         | 11.60             | 9.55         | 13.65        |             | 2          | 977         | 14.40             | 12.22        | 16.58        |
|             | 3          | 985         | 15.53             | 13.28        | 17.78        |             | 3          | 937         | 14.50             | 12.26        | 16.75        |
|             | 4          | 951         | 17.48             | 15.05        | 19.92        |             | 4          | 899         | 16.83             | 14.40        | 19.26        |
|             | Most Dep.  | 864         | 22.28             | 19.47        | 25.09        |             | Most Dep.  | 818         | 24.18             | 21.21        | 27.16        |
| <b>2014</b> | Least Dep. | 1024        | 10.71             | 8.80         | 12.62        |             |            |             |                   |              |              |
|             | 2          | 907         | 13.52             | 11.27        | 15.76        |             |            |             |                   |              |              |
|             | 3          | 880         | 15.30             | 12.93        | 17.67        |             |            |             |                   |              |              |
|             | 4          | 879         | 16.04             | 13.61        | 18.48        |             |            |             |                   |              |              |
|             | Most Dep.  | 871         | 21.91             | 19.10        | 24.73        |             |            |             |                   |              |              |

## Appendix 6: Age-sex standardised GHQ caseness by education level in 25–64-year-olds, 1991-2014

(displayed in Figure 3 in main text)

| Year        | Educ. Level | Sample Size | Adjusted Est. (%) | Lower 95% CI | Upper 95% CI | Year        | Educ. Level | Sample Size | Adjusted Est. (%) | Lower 95% CI | Upper 95% CI |
|-------------|-------------|-------------|-------------------|--------------|--------------|-------------|-------------|-------------|-------------------|--------------|--------------|
| <b>1991</b> | Degree      | 238         | 16.92             | 11.61        | 22.24        | <b>1992</b> | Degree      | 295         | 16.88             | 12.67        | 21.09        |
|             | A-Level     | 375         | 19.29             | 14.49        | 24.08        |             | A-Level     | 551         | 16.69             | 13.28        | 20.10        |
|             | GCSE        | 669         | 13.85             | 11.15        | 16.54        |             | GCSE        | 884         | 17.08             | 14.36        | 19.79        |
|             | None        | 738         | 15.65             | 12.81        | 18.48        |             | None        | 770         | 16.57             | 13.83        | 19.30        |
| <b>1993</b> | Degree      | 1356        | 18.18             | 15.56        | 20.79        | <b>1994</b> | Degree      | 1308        | 17.61             | 15.39        | 19.82        |
|             | A-Level     | 2286        | 15.55             | 13.96        | 17.14        |             | A-Level     | 2213        | 15.20             | 13.57        | 16.83        |
|             | GCSE        | 3508        | 15.90             | 14.61        | 17.18        |             | GCSE        | 3445        | 14.83             | 13.55        | 16.11        |
|             | None        | 3424        | 17.34             | 15.98        | 18.70        |             | None        | 3099        | 17.03             | 15.65        | 18.41        |
| <b>1997</b> | Degree      | 892         | 12.23             | 9.97         | 14.49        | <b>1998</b> | Degree      | 1642        | 14.66             | 12.75        | 16.56        |
|             | A-Level     | 1344        | 16.23             | 14.13        | 18.32        |             | A-Level     | 2362        | 15.38             | 13.88        | 16.88        |
|             | GCSE        | 1687        | 15.01             | 13.21        | 16.80        |             | GCSE        | 3243        | 15.23             | 13.90        | 16.56        |
|             | None        | 1496        | 16.69             | 14.69        | 18.70        |             | None        | 2589        | 16.92             | 15.30        | 18.53        |
| <b>1999</b> | Degree      | 868         | 15.62             | 13.07        | 18.17        | <b>2000</b> | Degree      | 952         | 12.50             | 10.31        | 14.68        |
|             | A-Level     | 1193        | 15.32             | 13.20        | 17.45        |             | A-Level     | 1382        | 10.75             | 9.08         | 12.42        |
|             | GCSE        | 1494        | 16.36             | 14.37        | 18.36        |             | GCSE        | 1558        | 14.38             | 12.53        | 16.23        |
|             | None        | 1245        | 21.39             | 18.80        | 23.98        |             | None        | 1152        | 19.12             | 16.45        | 21.80        |
| <b>2001</b> | Degree      | 1881        | 12.40             | 10.82        | 13.99        | <b>2002</b> | Degree      | 975         | 14.01             | 11.80        | 16.23        |
|             | A-Level     | 2501        | 12.87             | 11.54        | 14.20        |             | A-Level     | 1299        | 15.52             | 13.45        | 17.59        |
|             | GCSE        | 3115        | 12.47             | 11.27        | 13.67        |             | GCSE        | 1520        | 16.46             | 14.46        | 18.46        |
|             | None        | 2056        | 15.93             | 14.08        | 17.78        |             | None        | 855         | 22.12             | 18.83        | 25.42        |
| <b>2003</b> | Degree      | 1982        | 11.25             | 9.81         | 12.68        | <b>2004</b> | Degree      | 943         | 13.10             | 10.86        | 15.35        |
|             | A-Level     | 2339        | 12.22             | 10.87        | 13.57        |             | A-Level     | 1058        | 12.41             | 10.44        | 14.39        |
|             | GCSE        | 2940        | 12.98             | 11.74        | 14.22        |             | GCSE        | 1224        | 10.94             | 9.15         | 12.73        |
|             | None        | 1797        | 17.16             | 15.05        | 19.27        |             | None        | 884         | 18.26             | 15.36        | 21.17        |
| <b>2005</b> | Degree      | 1094        | 10.98             | 9.08         | 12.87        | <b>2006</b> | Degree      | 2217        | 10.51             | 9.19         | 11.83        |
|             | A-Level     | 1199        | 12.65             | 10.76        | 14.53        |             | A-Level     | 2332        | 13.37             | 11.98        | 14.76        |
|             | GCSE        | 1389        | 13.56             | 11.75        | 15.37        |             | GCSE        | 2536        | 13.73             | 12.36        | 15.11        |
|             | None        | 949         | 19.51             | 16.52        | 22.50        |             | None        | 1606        | 19.69             | 17.47        | 21.91        |
| <b>2008</b> | Degree      | 2388        | 11.04             | 9.76         | 12.32        | <b>2009</b> | Degree      | 745         | 13.01             | 10.43        | 15.59        |
|             | A-Level     | 2604        | 12.55             | 11.28        | 13.83        |             | A-Level     | 715         | 16.15             | 13.42        | 18.87        |
|             | GCSE        | 2669        | 14.82             | 13.44        | 16.20        |             | GCSE        | 873         | 18.41             | 15.76        | 21.06        |
|             | None        | 1639        | 19.43             | 17.18        | 21.68        |             | None        | 473         | 21.60             | 17.46        | 25.74        |
| <b>2010</b> | Degree      | 1387        | 13.21             | 11.40        | 15.02        | <b>2012</b> | Degree      | 1500        | 14.63             | 12.85        | 16.41        |
|             | A-Level     | 1375        | 15.43             | 13.51        | 17.35        |             | A-Level     | 1314        | 14.17             | 12.30        | 16.05        |
|             | GCSE        | 1447        | 15.56             | 13.64        | 17.49        |             | GCSE        | 1188        | 16.87             | 14.69        | 19.06        |
|             | None        | 673         | 21.54             | 17.86        | 25.22        |             | None        | 648         | 19.35             | 16.07        | 22.63        |
| <b>2014</b> | Degree      | 1533        | 12.96             | 11.25        | 14.67        |             |             |             |                   |              |              |
|             | A-Level     | 1273        | 13.61             | 11.68        | 15.53        |             |             |             |                   |              |              |



|  |      |      |       |       |       |  |  |  |  |  |  |
|--|------|------|-------|-------|-------|--|--|--|--|--|--|
|  | GCSE | 1145 | 15.13 | 13.00 | 17.26 |  |  |  |  |  |  |
|  | None | 581  | 23.71 | 20.04 | 27.38 |  |  |  |  |  |  |

## Appendix 7: Relative index of inequality in GHQ caseness, 1991-2014

(displayed in Figure 4 in main text)

| Highest Education Level as Measure of SEP |                      |         |              |              | Area-Level Deprivation as Measure of SEP |                      |         |              |              |
|-------------------------------------------|----------------------|---------|--------------|--------------|------------------------------------------|----------------------|---------|--------------|--------------|
| Year                                      | Incidence Rate Ratio | p-value | Lower 95% CI | Upper 95% CI | Year                                     | Incidence Rate Ratio | p-value | Lower 95% CI | Upper 95% CI |
| 1991                                      | 0.86                 | 0.445   | 0.58         | 1.27         |                                          |                      |         |              |              |
| 1992                                      | 0.88                 | 0.458   | 0.63         | 1.23         |                                          |                      |         |              |              |
| 1993                                      | 1.02                 | 0.797   | 0.87         | 1.21         |                                          |                      |         |              |              |
| 1994                                      | 0.96                 | 0.634   | 0.81         | 1.14         |                                          |                      |         |              |              |
| 1997                                      | 1.25                 | 0.054   | 1.00         | 1.57         |                                          |                      |         |              |              |
| 1998                                      | 1.11                 | 0.232   | 0.93         | 1.32         |                                          |                      |         |              |              |
| 1999                                      | 1.46                 | 0.002   | 1.15         | 1.86         |                                          |                      |         |              |              |
| 2000                                      | 1.79                 | <0.001  | 1.37         | 2.33         |                                          |                      |         |              |              |
| 2001                                      | 1.26                 | 0.018   | 1.04         | 1.53         | 2001                                     | 1.68                 | <0.001  | 1.40         | 2.02         |
| 2002                                      | 1.51                 | 0.001   | 1.18         | 1.93         | 2002                                     | 1.93                 | <0.001  | 1.54         | 2.41         |
| 2003                                      | 1.57                 | <0.001  | 1.27         | 1.92         | 2003                                     | 1.95                 | <0.001  | 1.61         | 2.37         |
| 2004                                      | 1.35                 | 0.066   | 0.98         | 1.86         | 2004                                     | 2.05                 | <0.001  | 1.52         | 2.77         |
| 2005                                      | 1.70                 | <0.001  | 1.29         | 2.24         | 2005                                     | 2.65                 | <0.001  | 2.03         | 3.47         |
| 2006                                      | 1.98                 | <0.001  | 1.61         | 2.43         | 2006                                     | 2.13                 | <0.001  | 1.74         | 2.60         |
| 2008                                      | 1.79                 | <0.001  | 1.47         | 2.18         | 2008                                     | 2.28                 | <0.001  | 1.89         | 2.76         |
| 2009                                      | 2.13                 | <0.001  | 1.52         | 2.99         | 2009                                     | 2.11                 | <0.001  | 1.54         | 2.91         |
| 2010                                      | 1.59                 | 0.001   | 1.22         | 2.08         | 2010                                     | 1.85                 | <0.001  | 1.43         | 2.38         |
| 2012                                      | 1.46                 | 0.005   | 1.12         | 1.90         | 2012                                     | 2.32                 | <0.001  | 1.80         | 2.99         |
| 2014                                      | 1.72                 | <0.001  | 1.31         | 2.26         | 2014                                     | 2.22                 | <0.001  | 1.72         | 2.87         |
